# Supplementary material
Source: PubMed Central journal article supplement (PMC3227766)
Supplement: NIHMS335917-supplement-1_si_001.pdf [file NIHMS335917-supplement-1_si_001.pdf]

## SUPPORTING INFORMATION

### Insight Into the Cation- $\pi$ Interaction at the Metal Binding Site of the Copper Metallochaperone CusF

Dhruva K. Chakravorty, Bing Wang, Melek N. Ucisik and Kenneth M. Merz Jr.\*

Department of Chemistry and the Quantum Theory Project, 2328 New Physics Building, P.O. Box  
118435, University of Florida, Gainesville, FL 32611-8435; e-mail: [merz@qtp.ufl.edu](mailto:merz@qtp.ufl.edu)

\*Corresponding author:

Kenneth M. Merz Jr.

Phone: 352-392-6973

Fax: 352-392-8722

e-mail: [merz@qtp.ufl.edu](mailto:merz@qtp.ufl.edu)

Running Title: Cation- $\pi$  interaction in CusF

Funding acknowledgment:

This work was supported by grants from the NIH to K.M.M. (GM044974) and (GM066859)

## Table of Contents

|        |                                              |       |
|--------|----------------------------------------------|-------|
| (i)    | Abbreviations                                | SI.3  |
| (ii)   | Methods and Results                          | SI.4  |
| (iii)  | Complete References for Main Text            | SI.6  |
| (iv)   | References for SI                            | SI.7  |
| (v)    | Tables                                       | SI.8  |
| (vi)   | Figures                                      | SI.13 |
| (vii)  | W44M structure file from QM/MM calculation   | SI.22 |
| (viii) | Counter-poise input files                    | SI.41 |
| (ix)   | Amber metal recognition site parameter files | SI.47 |

## **Abbreviations**

QM: quantum mechanics

BSSE: basis set superposition error

DFT: density functional theory

PBE: Perdew-Burke-Erzhof

MD: molecular dynamics

QM/MM: quantum-mechanical/molecular-mechanical

SI: Supporting Information

PMF: potential of mean force

RMSF: root mean square fluctuations

MP2: second order Møller-Plesset perturbation

RMSD: root mean square deviation

LJ: Lennard-Jones

## Methods and Results:

### 1. Interaction Energy Calculations: Counterpoise Method

We performed quantum mechanics (QM) calculations on the metal binding region of the protein to determine the strength of the cation- $\pi$  interaction between Trp44 and the metal ion. The geometries for these calculations were obtained from crystal structures of the  $\text{Cu}^+$  (pdb code: 2VB2)<sup>1</sup> and  $\text{Ag}^+$  (pdb codes: 2VB3<sup>1</sup> and 2QCP<sup>2</sup>) bound forms of the protein. The structures in these calculations are shown in Fig. 2 of the communication (reproduced below for convenience), and, portray a model system including the metal ion and the imidazole ring of His36, the dimethyl sulphide groups of Met47 and Met49, and the indole ring of Trp44. The valences of all heavy atoms were completed by adding hydrogen atoms to them using GaussView<sup>3</sup>. The hydrogen atom positions were subsequently optimized at the density functional level of theory (DFT) using the B3LYP functional<sup>4</sup> with the 6-31G\* basis set<sup>5</sup>, while keeping all heavy atoms fixed. The basis set superposition error (BSSE) corrected fragment interaction energies were calculated in vacuum using the implementation of the counterpoise method<sup>6</sup> in Gaussian09.<sup>7</sup> We first calculated the interaction energy between a fragment containing Trp44 and a fragment containing the metal ion and its other coordinating residues, namely His36, Met47 and Met49. The strength of this Trp-Cu(I)-HMM interaction was calculated at the second order Møller-Plesset perturbation (MP2) level of theory<sup>8-12</sup> with the augmented Dunning correlation-consistent polarized, aug-cc-pVDZ basis set.<sup>13</sup> The Trp-Ag(I)-HMM interaction energy for  $\text{Ag}^+$  ions were similarly calculated at the MP2 level of theory paired with a double zeta-quality Lanl2dz basis set for  $\text{Ag}^+$ .<sup>14</sup> This combination of the level of theory and basis sets has been shown to accurately calculate the ionization potentials of  $\text{Ag}^+$  ions.<sup>15</sup> The aug-cc-pVDZ basis set was applied to all remaining atoms in this calculation.

The interaction energy between the metal ion binding residues in the apo state of the protein, *i.e.* in the absence of the metal ion, was calculated to estimate the stabilization offered by the  $\text{Cu}^+/\text{Ag}^+$ -W44 interaction. In this calculation, the apo interaction energy (Trp-HMM) between Trp44 and the metal ion binding His36, Met47 and Met49 residues was calculated (Fig. 2) at the same geometry. This approach provides an estimate for the apo interaction energy while assuming that the metal binding ligands maintain the same orientation and distances in the apo state of the protein, and polarization effects caused by metal binding do not play a major role. These interaction energies are similar to that between these residues for the apo 1ZEQ crystal structure<sup>16</sup> of CusF (-5.43 kcal/mol). Finally, the calculated difference between the Trp-Cu(I)-HMM interaction and the Trp-HMM interaction provided an estimate for the stabilization obtained from the  $\text{Cu}^+/\text{Ag}^+$ -W44 interaction.

We next compared the performance of various functionals within the framework of density functional theory (DFT) in capturing this unique cation- $\pi$  interaction. The Trp-Cu(I)-HMM interaction energy was calculated with the aug-cc-pVDZ basis set using the B3LYP, M06-L, M06-2X, TPSS/KCIS, TPSS/TPSS, TPSSh, mPW3PBE, PBE1PBE and wB97XD functionals (Table SI.2).<sup>17</sup> A detailed evaluation of these functionals along with a complete list of references may be found in Reference #17. A repulsive interaction energy of 0.97 kcal/mol was determined at the Hartree-Fock level of theory for this geometry.

The Perdew-Burke-Erzerhof (PBE) functional was chosen because it is a pure functional with a strong theoretical foundation.<sup>18</sup> This functional, however, suffers from significant errors in thermochemical predictions, and is unable to capture the cation- $\pi$  interaction accurately. The popular hybrid B3LYP functional that includes exact Hartree-Fock exchange is unable to reproduce this interactions as well. In accordance with recently published work, we find the specially designed Truhlar hybrid meta M06-L<sup>19</sup> and M06-2X<sup>20</sup> functionals, along with the Head-Gordon empirical dispersion wB97XD functional<sup>21</sup> provide an accurate description of the cation- $\pi$  interaction. While the M06-2X functional was not designed for transition metals in general, it was parameterized to predict non-covalent interactions accurately, and does well in this situation.

### 2. Natural Bonding Order Calculations:

We also performed a natural bonding orbital (NBO)<sup>22</sup> calculation to determine the covalency of the  $\text{Cu}^+/\text{Ag}^+$  metal ion interaction with the C $\epsilon$ 3 and C $\zeta$ 3 carbon atoms of Trp44 at these crystal structure geometries. These calculations were performed at the MP2 level of theory using the same basis sets used to calculate the interaction energies. The calculated bond orders (Wiberg bond indices) between the metal ion and its ligating atoms are shown in Table SI.3. For comparison, we also present the results of these calculations for the other bonds formed by the metal ion. It should be noted that these bond orders and interaction energies are not a direct measure of the binding affinity of these metal ions to the protein.

### 3. Trp44 Dihedral Quantum-Mechanical / Molecular-Mechanical (QM/MM) Calculation

We performed QM/MM calculations to study the mobility of Trp44 at the metal recognition site. We calculated the potential of mean force (PMF) to obtain the barrier to rotation of Trp44 along the  $\text{Cu}^+$ -C $\beta$ -C $\gamma$ -C $\delta$ 1 “swing out” dihedral (Fig. SI.7). Moving along this dihedral will allow Trp44 to swing back, away from  $\text{Cu}^+$  and its other binding residues. These calculations were performed using the Qsite program in the Schrödinger suite of programs.<sup>23</sup> The metal binding region consisting of the His36, Trp44, Met47 and Met49 residues was treated at the DFT level of theory using the M06-2X functional with the 6-31G\* basis set. The LACVP\* implementation of double-zeta effective core potentials in Qsite was employed to treat  $\text{Cu}^+$  in these calculations. The metal binding residues were introduced by means of side-chain cuts between the C $\alpha$  and C $\beta$  side-chain carbon atoms. The remainder of the protein was treated as part of the MM region and was modeled using the OPLS 2005 force field.<sup>24</sup> This calculation was performed in the gas phase and the entire protein was free to move. The  $\text{Cu}^+$  ion was constrained to its starting position to prevent it from moving with the “swinging” Trp44 residue. QM/MM minimized energies calculated along this dihedral coordinate, revealed an energetic penalty associated with rotating the  $\text{Cu}^+$ -C $\beta$ -C $\gamma$ -C $\delta$ 1 dihedral away from its minima. These results suggest that the ~14 kcal/mol  $\text{Cu}^+$ -W44 interaction in addition to the protein’s structural features lock the Trp44 molecule in place.

### 4. Determining the Metal Recognition Site Geometry of W44M using QM/MM Calculations

We investigated the Cu<sup>+</sup> binding geometry of the W44M mutant using QM/MM (DFT/M06L) calculations. In these calculations, the W44M mutation was performed on the WT CusF 2VB2 crystal structure using the tleap utility in AmberTools 1.5<sup>25</sup>, while maintaining the position of the Cu<sup>+</sup> ion. The protein structure was then prepared for a QM/MM Qsite calculation using the prepwizd utility in the Schrödinger suite of tools.

We implemented a strategy of gradually increasing the complexity of the calculation in terms of the number of atoms included in the QM region, and the size of basis sets. In the first phase, the metal recognition site consisting of His36, Met44, Met47, Met49 and the Cu<sup>+</sup> ion was treated quantum mechanically at the DFT level of theory using the M06-L meta hybrid functional. The metal binding residues were introduced using side-chain cuts and all atoms were treated with the 6-31G\* basis set and the double-zeta quality LACVP\* effective core potentials were employed to treat the Cu<sup>+</sup> ion. The Cu<sup>+</sup> ion was allowed to decide its coordination in this calculation. The MM part of the calculation was treated with the OPLS 2005 force field. All residues beyond a 10 Å cut-off distance from any atom on the metal binding residues and the metal ion were kept frozen. The prepared protein structure was then energy minimized using the truncated Newton method. These calculations found Cu<sup>+</sup> bound to H36, M47, M44 and M49 in a distorted tetrahedral arrangement.

We improved on the resultant geometry of the metal recognition site by solvating the QM/MM minimized protein structure in a truncated octahedral box of SPC/E water molecules<sup>26</sup> using the Desmond system builder.<sup>27,28</sup> A 10 Å solvent buffer was maintained around the protein, and the system was neutralized by adding Cl<sup>-</sup> ions. The QM region from the previous calculation was maintained, and all atoms within a 12 Å distance from any QM atom were allowed to move in this calculation. This cut-off distance included water molecules, and most of the protein structure. The Cu<sup>+</sup> coordination remained unchanged at the end of this minimization run. The protein structure was further improved by performing the next round of optimization with the LACV3P++\* triple-zeta effective core potentials on Cu<sup>+</sup> and treating the remaining atoms with the 6-311++G\* basis set.<sup>29,30</sup> The mobile region around the protein was increased to a cut-off distance of 15 Å, and included the entire protein structure. In the final round of minimization, all residues from Asn43 to Arg50 were included in the QM region using backbone cuts, in addition to His36 that was introduced using a side-chain cut, as shown in Fig. SI.4. The mobile region cut-off distance was increased to 17 Å from the QM atoms in this calculation. The resulting bond lengths and bond angles are listed in Tables SI.4 and SI.5, and the final geometry is shown in Fig. SI.4 and Fig. SI.5. While, these calculations provide us with an idea of the binding environment of Cu<sup>+</sup> in W44M CusF, they are hindered by an inherent lack of conformational sampling that introduces errors in this approach. The coordinates for the minimized protein are presented in a latter section of SI.

## 5. Molecular Dynamics (MD) Simulations

In addition to QM and QM/MM calculations, we simulated the apo and Cu<sup>+</sup> bound holo states of the protein using all atom MD simulations with explicit water molecules. These simulations were performed with the Amber11 suite of

programs.<sup>31</sup> The AMBER ff99SB<sup>32</sup> force field was employed to describe the MD potential. Simulations of the apo state of the protein were started from the 1ZEQ crystal structure of the apo allosteric form of the protein. The 2VB2 Cu<sup>+</sup> bound crystal structure of CusF was chosen as the starting structure for simulations of the holo state of the protein. The protonation states for all charged amino acids were calculated using the H++ protonation state calculation server.<sup>33-35</sup> The metal binding residues were maintained in their metal binding protonation states in our simulations of the apo state of the protein. Cu<sup>+</sup> ions were modeled using the “bonded model” approach in simulations of the metal bound allosteric form.<sup>36</sup> In this approach, the metal ion was bonded to His36, Met47 and Met49 in the simulated system.

The MTK++ program<sup>36</sup> available with AmberTools 1.5 was used to generate the parameters associated with Cu<sup>+</sup> binding in the metal binding site based on the 2VB2 crystal structure. A detailed description of this method has been provided in Reference #36. In this methodology, the Cu<sup>+</sup> ion and the metal recognition site from the 2VB2 crystal structure consisting of His36, Met47 and Met49 were optimized at the DFT level of theory (B3LYP/6-31G\*), and bonded parameters were then obtained from the frequencies derived from the optimized structures. A concomitant RESP charge calculation was performed to obtain the charges for Cu<sup>+</sup> and the metal ion ligating residues. The ff99SB Lennard-Jones (LJ) parameters governing the Trp44 residue Cε3 and Cζ3 interaction with Cu<sup>+</sup> underestimated the strength of the interaction, and were modified to accurately portray the interaction energy between the cation and Trp44. The refined force-field file is included in a latter section of SI.

The allosteric forms of the protein were prepared for MD simulations using a standard procedure. To evaluate the gains from the cation-π interaction, we simulated the Cu<sup>+</sup> ion bound form of the protein with the refined LJ parameters and standard ff99SB LJ parameters. Each system was soaked in a periodically replicated octahedral box of SPC/E water molecules<sup>26</sup> with an 8 Å solvation layer around every solute atom. Explicit counter ions were added to neutralize the system. The solvated protein was then energy minimized over two stages. In the first stage of minimization, water molecules and counter-ions were allowed to optimize their positions, while the protein was kept restrained. In the second stage of minimization, the protein was allowed to minimize in its solvated environment. The system was then systematically heated to 300K over 100 ps of MD for the constant pressure and constant temperature (NVT) ensemble while maintaining weak restraints on protein heavy atoms. These restraints were then removed and an additional 1 ns of MD simulations were performed for the isothermal-isobaric (NPT) ensemble. The protein backbone root mean square deviation (RMSD) was monitored to ensure that we had a well solvated and equilibrated structure for our simulations. Trajectories were then propagated from these structures for an isothermal and isobaric ensemble (NPT) for 120 ns. A time step of 2 fs was utilized and the particle mesh Ewald method<sup>37,38</sup> was employed to calculate long-range electrostatic interactions in these simulations. Frames were collected at a frequency of 1000 steps and the SHAKE algorithm<sup>39</sup> was used to constrain heavy atom to hydrogen atom bond lengths. A Langevin thermostat was utilized to maintain the temperature of the system in these simulations.

## Complete References From Article:

(10) Frisch, M. J.; Trucks, G. W.; Schlegel, H. B.; Scuseria, G. E.; Robb, M. A.; Cheeseman, J. R.; Montgomery, J. A. J.; Vreven, T.; Kudin, K. N.; Burant, J. C.; Millam, J. M.; Iyengar, S. S.; Tomasi, J.; Barone, V.; Mennucci, B.; Cossi, M.; Scalmani, G.; Rega, N.; Petersson, G. A.; Nakatsuji, H.; Hada, M.; Ehara, M.; Toyota, K.; Fukuda, R.; Hasegawa, J.; Ishida, M.; Nakajima, T.; Honda, Y.; Kitao, O.; Nakai, H.; Klene, M.; Li, X.; Knox, J. E.; Hratchian, H. P.; Cross, J. B.; Bakken, V.; Adamo, C.; Jaramillo, J.; Gomperts, R.; Stratmann, R. E.; Yazyev, O.; Austin, A. J.; Cammi, R.; Pomelli, C.; Ochterski, J. W.; Ayala, P. Y.; Morokuma, K.; Voth, G. A.; Salvador, P.; Dannenberg, J. J.; Zakrzewski, V. G.; Dapprich, S.; Daniels, A. D.; Strain, M. C.; Farkas, O.; Malick, D. K.; Rabuck, A. D.; Raghavachari, K.; Foresman, J. B.; Ortiz, J. V.; Cui, Q.; Baboul, A. G.; Clifford, S.; Cioslowski, J.; Stefanov, B. B.; Liu, G.; Liashenko, A.; Piskorz, P.; Komaromi, I.; Martin, R. L.; Fox, D. J.; Keith, T.; Al-Laham, M. A.; Peng, C. Y.; Nanayakkara, A.; Challacombe, M.; Gill, P. M. W.; Johnson, B.; Chen, W.; Wong, M. W.; Gonzalez, C.; Pople, J.; A.01 ed.; Gaussian, Inc.: Wallingford, CT, 2009.

(12) Case, D. A.; Darden, T. A.; T.E. Cheatham, I.; Simmerling, C. L.; Wang, J.; Duke, R. E.; Luo, R.; Walker, R. C.; Zhang, W.; Merz, K. M.; Roberts, B.; Wang, B.; Hayik, S.; Roitberg, A.; Seabra, G.; Kolossvai, I.; Wong, K. F.; Paesani, F.; Vanicek, J.; Liu, J.; Wu, X.; Brozell, S. R.; Steinbrecher, T.; Gohlke, H.; Cai, Q.; Ye, X.; Wang, J.; Hsieh, M.-J.; Cui, G.; Roe, D. R.; Mathews, D. H.; Seetin, M. G.; Sagui, C.; Babin, V.; Luchko, T.; Gusarov, S.; Kovalenko, A.; Kollman, P. A. AMBER11; University of California, San Francisco: 2010.

## References for SI:

- (1) Xue, Y.; Davis, A. V.; Balakrishnan, G.; Stasser, J. P.; Staehlin, B. M.; Focia, P.; Spiro, T. G.; Penner-Hahn, J. E.; O'Halloran, T. V. *Nature Chemical Biology* **2008**, *4*, 107-109.
- (2) Loftin, I. R.; Franke, S.; Blackburn, N. J.; McEvoy, M. M. *Protein Sci* **2007**, *16*, 2287-2293.
- (3) Dennington, R.; Keith, T.; Millam, J.; GaussView Version 5; Semichem Inc.: Shawnee Mission KS, 2009.
- (4) Becke, A. D. *J Chem Phys* **1993**, *98*, 5648-5652.
- (5) Ditchfie, R.; Hehre, W. J.; Pople, J. A. *J Chem Phys* **1971**, *54*, 724-728.
- (6) Boys, S. F.; Bernardi, F. *Mol Phys* **1970**, *19*, 553-566.
- (7) Frisch, M. J.; Trucks, G. W.; Schlegel, H. B.; Scuseria, G. E.; Robb, M. A.; Cheeseman, J. R.; Montgomery, J. A. J.; Vreven, T.; Kudin, K. N.; Burant, J. C.; Millam, J. M.; Iyengar, S. S.; Tomasi, J.; Barone, V.; Mennucci, B.; Cossi, M.; Scalmani, G.; Rega, N.; Petersson, G. A.; Nakatsuji, H.; Hada, M.; Ehara, M.; Toyota, K.; Fukuda, R.; Hasegawa, J.; Ishida, M.; Nakajima, T.; Honda, Y.; Kitao, O.; Nakai, H.; Klene, M.; Li, X.; Knox, J. E.; Hratchian, H. P.; Cross, J. B.; Bakken, V.; Adamo, C.; Jaramillo, J.; Gomperts, R.; Stratmann, R. E.; Yazyev, O.; Austin, A. J.; Cammi, R.; Pomelli, C.; Ochterski, J. W.; Ayala, P. Y.; Morokuma, K.; Voth, G. A.; Salvador, P.; Dannenberg, J. J.; Zakrzewski, V. G.; Dapprich, S.; Daniels, A. D.; Strain, M. C.; Farkas, O.; Malick, D. K.; Rabuck, A. D.; Raghavachari, K.; Foresman, J. B.; Ortiz, J. V.; Cui, Q.; Baboul, A. G.; Clifford, S.; Cioslowski, J.; Stefanov, B. B.; Liu, G.; Liashenko, A.; Piskorz, P.; Komaromi, I.; Martin, R. L.; Fox, D. J.; Keith, T.; Al-Laham, M. A.; Peng, C. Y.; Nanayakkara, A.; Challacombe, M.; Gill, P. M. W.; Johnson, B.; Chen, W.; Wong, M. W.; Gonzalez, C.; Pople, J.; A.01 ed.; Gaussian, Inc.: Wallingford, CT, 2009.
- (8) Headgordon, M.; Headgordon, T. *Chem Phys Lett* **1994**, *220*, 122-128.
- (9) Frisch, M. J.; Headgordon, M.; Pople, J. A. *Chem Phys Lett* **1990**, *166*, 275-280.
- (10) Frisch, M. J.; Headgordon, M.; Pople, J. A. *Chem Phys Lett* **1990**, *166*, 281-289.
- (11) Headgordon, M.; Pople, J. A.; Frisch, M. J. *Chem Phys Lett* **1988**, *153*, 503-506.
- (12) Saebo, S.; Almlöf, J. *Chem Phys Lett* **1989**, *154*, 83-89.
- (13) Balabanov, N. B.; Peterson, K. A. *J Chem Phys* **2005**, *123*, 64107.
- (14) Wadt, W. R.; Hay, P. J. *J Chem Phys* **1985**, *82*, 284-298.
- (15) Olson, R.; Varganov, S.; Gordon, M. S.; Metiu, H. *Chem Phys Lett* **2005**, *412*, 416-419.
- (16) Loftin, I. R.; Franke, S.; Roberts, S. A.; Weichsel, A.; Heroux, A.; Montfort, W. R.; Rensing, C.; McEvoy, M. M. *Biochemistry* **2005**, *44*, 10533-10540.
- (17) Cramer, C. J.; Truhlar, D. G. *Phys Chem Chem Phys* **2009**, *11*, 10757-10816.
- (18) Perdew, J. P.; Burke, K.; Ernzerhof, M. *Phys Rev Lett* **1996**, *77*, 3865-3868.
- (19) Zhao, Y.; Truhlar, D. G. *J Chem Phys* **2006**, *125*, 194101.
- (20) Zhao, Y.; Truhlar, D. G. *Theor Chem Acc* **2008**, *120*, 215-241.
- (21) Chai, J. D.; Head-Gordon, M. *Phys Chem Chem Phys* **2008**, *10*, 6615-6620.
- (22) Foster, J. P.; Weinhold, F. *J Am Chem Soc* **1980**, *102*, 7211-7218.
- (23) Qsite; 5.7 ed.; Schrödinger, Inc.: New York, NY, 2011.
- (24) Jorgensen, W. L.; Tirado-Rives, J. *P Natl Acad Sci USA* **2005**, *102*, 6665-6670.
- (25) Case, D. A.; Darden, T. A.; T.E. Cheatham, I.; Simmerling, C. L.; Wang, J.; Duke, R. E.; Luo, R.; Walker, R. C.; Zhang, W.; Merz, K. M.; Roberts, B.; Wang, B.; Hayik, S.; Roitberg, A.; Seabra, G.; Kolossvai, I.; Wong, K. F.; Paesani, F.; Vanicek, J.; Liu, J.; Wu, X.; Brozell, S. R.; Steinbrecher, T.; Gohlke, H.; Cai, Q.; Ye, X.; Wang, J.; Hsieh, M.-J.; Cui, G.; Roe, D. R.; Mathews, D. H.; Seetin, M. G.; Sagui, C.; Babin, V.; Luchko, T.; Gusarov, S.; Kovalenko, A.; Kollman, P. A. AMBER11; University of California, San Francisco: 2010.
- (26) Berendsen, H. J. C.; Grigera, J. R.; Straatsma, T. P. *J Phys Chem-Us* **1987**, *91*, 6269-6271.
- (27) Desmond Molecular Dynamics System; Version 3.0 ed.; D. E. Shaw Research: New York, NY, 2011.
- (28) Tools, M.-D. I.; Version 3.0 ed.; Schrödinger: New York, NY, 2011.
- (29) Mclean, A. D.; Chandler, G. S. *J Chem Phys* **1980**, *72*, 5639-5648.
- (30) Krishnan, R.; Binkley, J. S.; Seeger, R.; Pople, J. A. *J Chem Phys* **1980**, *72*, 650-654.
- (31) Case, D. A.; Cheatham, T. E., 3rd; Darden, T.; Gohlke, H.; Luo, R.; Merz, K. M., Jr.; Onufriev, A.; Simmerling, C.; Wang, B.; Woods, R. J. *J Comput Chem* **2005**, *26*, 1668-1688.
- (32) Hornak, V.; Abel, R.; Okur, A.; Strockbine, B.; Roitberg, A.; Simmerling, C. *Proteins* **2006**, *65*, 712-725.
- (33) <http://biophysics.cs.vt.edu/H++>
- (34) Gordon, J. C.; Myers, J. B.; Foltz, T.; V, S.; Heath, L. S.; Onufriev, A. *Nucleic Acids Res* **2005**, *33*, W368-W371.
- (35) Myers, J.; Grothaus, G.; Narayanan, S.; Onufriev, A. *Proteins* **2006**, *63*, 928-938.
- (36) Peters, M. B.; Yang, Y.; Wang, B.; Fusti-Molnar, L.; Weaver, M. N.; Merz, K. M. *J Chem Theory Comput* **2010**, *6*, 2935-2947.
- (37) Deleuw, S. W.; Perram, J. W.; Smith, E. R. *P Roy Soc Lond a Mat* **1980**, *373*, 27-56.
- (38) Hockney, R. W.; Eastwood, J. W. *Computer Simulation Using Particles*; McGraw-Hill: New York 1981.
- (39) Ryckaert, J. P.; Ciccotti, G.; Berendsen, H. J. C. *J Comput Phys* **1977**, *23*, 327-341.

## Tables:

**Table SI.1. Cu<sup>+</sup>/Ag<sup>+</sup>-Trp44 interaction energies calculated at the MP2 level of theory (kcal/mol).**

| Metal(I)•PDBcode          | Trp44-M(I)•HMM | Trp44-HMM |
|---------------------------|----------------|-----------|
|                           |                |           |
| Cu(I)•2VB2 <sup>a</sup>   | -15.045        | -4.248    |
| Cu(I)•2VB2 <sup>b</sup>   | -14.745        | -4.248    |
| Ag(I)•2QCP <sup>b,c</sup> | -14.568        | -4.533    |
| Ag(I)•2VB3 <sup>b</sup>   | -13.743        | -2.982    |
| Cu(I)•W44M <sup>a</sup>   | -20.597        | 0.202     |
| apo 1ZEQ <sup>a</sup>     | —              | -5.432    |

<sup>a</sup> Interaction energies were calculated using the aug-cc-pVDZ basis set on all atoms.

<sup>b</sup> Interaction energies were calculated using the LANL2DZ effective core potentials for metal ions. The aug-cc-pVDZ basis set was used to treat the remaining atoms in the system.

<sup>c</sup> Interaction energies were calculated for the major conformer.

**Table SI.2. Trp44-Cu(I)•HMM interaction energies calculated using DFT functionals.**

| DFT Functional | Interaction Energy (kcal/mol) |
|----------------|-------------------------------|
|                |                               |
| B3LYP          | -3.450                        |
| M06-L          | -14.555                       |
| M06-2X         | -14.633                       |
| TPSS/KCIS      | -5.576                        |
| TPSS/TPSS      | -6.606                        |
| mPW3PBE        | -6.323                        |
| PBE1PBE        | -8.029                        |
| TPSSh          | -6.633                        |
| wB97XD         | -15.476                       |

These interaction energies were calculated for model systems based on the Cu(I)•2VB2 structure metal recognition site geometry. The interaction energy calculated at the MP2 level of theory for this geometry was -15.045 kcal/mol.

**Table SI.3. Wiberg bond order indices between the metal ion and its coordinating atoms calculated at the MP2 level of theory.**

| <i>M(I)•PDB</i>         | <i>N(H36)</i> | <i>S(M47)</i> | <i>S(M49)</i> | <i>Cε3(W44)</i> | <i>Cζ3(W44)</i> |
|-------------------------|---------------|---------------|---------------|-----------------|-----------------|
|                         |               |               |               |                 |                 |
| Cu(I)•2VB2 <sup>a</sup> | 0.192         | 0.362         | 0.317         | 0.049           | 0.363           |
| Ag(I)•2QCP <sup>b</sup> | 0.164         | 0.270         | 0.256         | 0.037           | 0.028           |
| Ag(I)•2VB3 <sup>b</sup> | 0.126         | 0.215         | 0.242         | 0.027           | 0.019           |

<sup>a</sup> These bond indices were calculated using the aug-cc-pVDZ basis set on all atoms.

<sup>b</sup> These bond indices were calculated using the LANL2DZ effective core potentials for metal ions. The aug-cc-pVDZ basis set was used to treat the remaining atoms in the system.

**Table SI.4. Bond lengths to Cu<sup>+</sup> obtained from W44M mutant calculations.**

| <b>Res(Atom) Bonded to Cu<sup>+</sup></b> | <b>Bond Length (Å)</b> |
|-------------------------------------------|------------------------|
|                                           |                        |
| <i>H36(N)</i>                             | 2.10                   |
| <i>M44(S)</i>                             | 2.39                   |
| <i>M47(S)</i>                             | 2.42                   |
| <i>M49(S)</i>                             | 2.42                   |

**Table SI.5. Bond angles involving Cu<sup>+</sup> obtained from W44M mutant calculations.**

| <b>X-Cu<sup>+</sup>-X angles</b>    | <b>Bond Angles (Degrees)</b> |
|-------------------------------------|------------------------------|
|                                     |                              |
| <i>H36(N)-Cu<sup>+</sup>-M44(S)</i> | 109.38                       |
| <i>H36(N)-Cu<sup>+</sup>-M47(S)</i> | 115.5                        |
| <i>H36(N)-Cu<sup>+</sup>-M49(S)</i> | 104.52                       |
| <i>M44(S)-Cu<sup>+</sup>-M47(S)</i> | 112.97                       |
| <i>M44(S)-Cu<sup>+</sup>-M49(S)</i> | 111.82                       |
| <i>M47(S)-Cu<sup>+</sup>-M49(S)</i> | 102.14                       |

**Figures:**

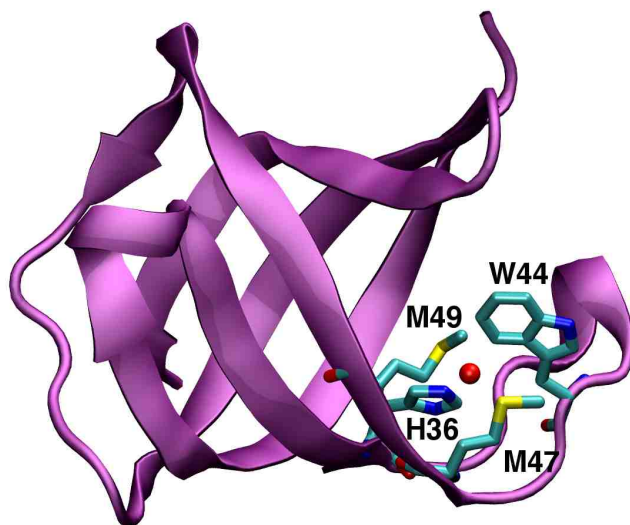

**Figure SI.1.** Cartoon depiction of CusF from the 2VB2 crystal structure of Cu(I)•CusF. The metal binding residues are depicted in stick notation. The Cu<sup>+</sup> ion is shown as a red sphere.

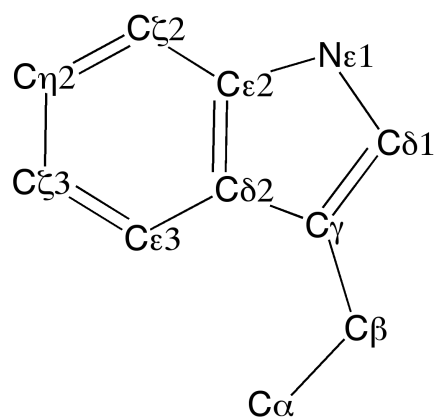

**Figure SI.2.** Tryptophan atom numbering scheme.

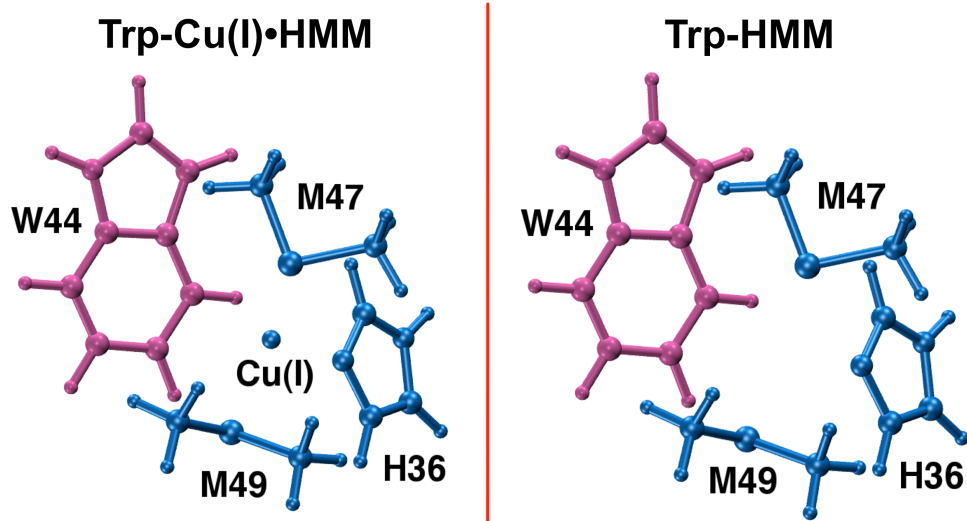

**Figure 2.**  $\text{Cu}^+$ -CusF metal binding site geometry. Interaction energies were calculated between the pink and blue fragments. The Trp-Cu(I)-HMM interaction energy provided the W44 interaction to bound  $\text{Cu}^+$  (W44 and  $\text{Cu}^+$ -H36-M47-M49) and the Trp-HMM interaction gave the interaction energy between W44 and other metal binding residues in the absence of  $\text{Cu}^+$  (W44 and H36-M47-M49) at the same geometry. The stabilization from the cation- $\pi$  interaction was estimated as Trp-Cu(I)-HMM – Trp-HMM.

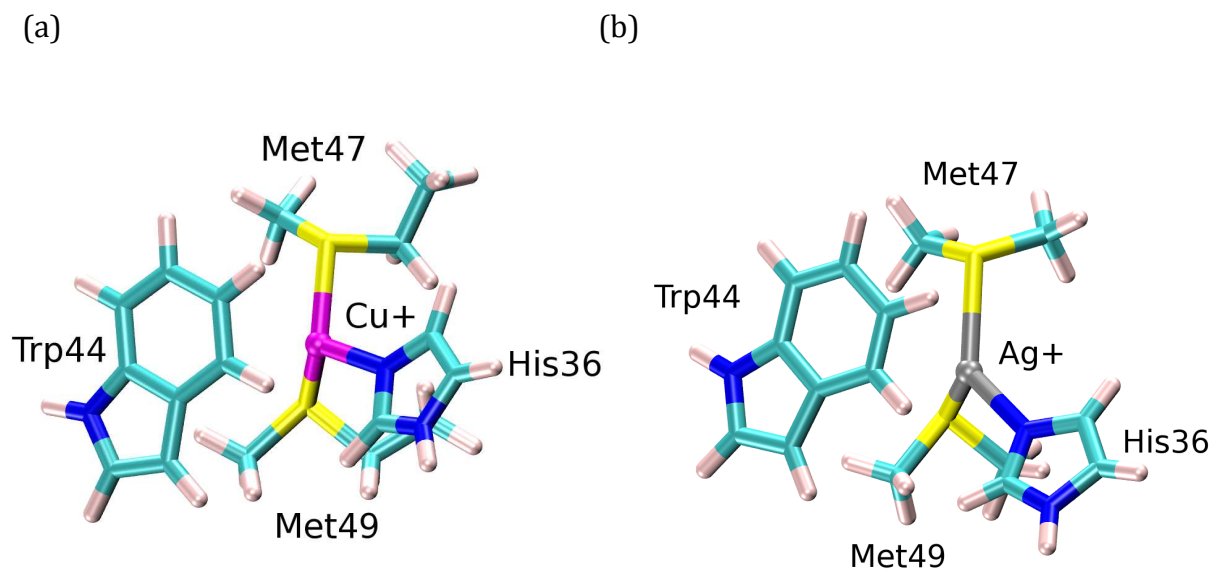

**Figure SI.3.** (a)  $\text{Cu}^+\cdot\text{CusF}$  and (b)  $\text{Ag}^+\cdot\text{CusF}$  metal binding site geometries from 2VB2 and 2QCP pdb structures respectively.

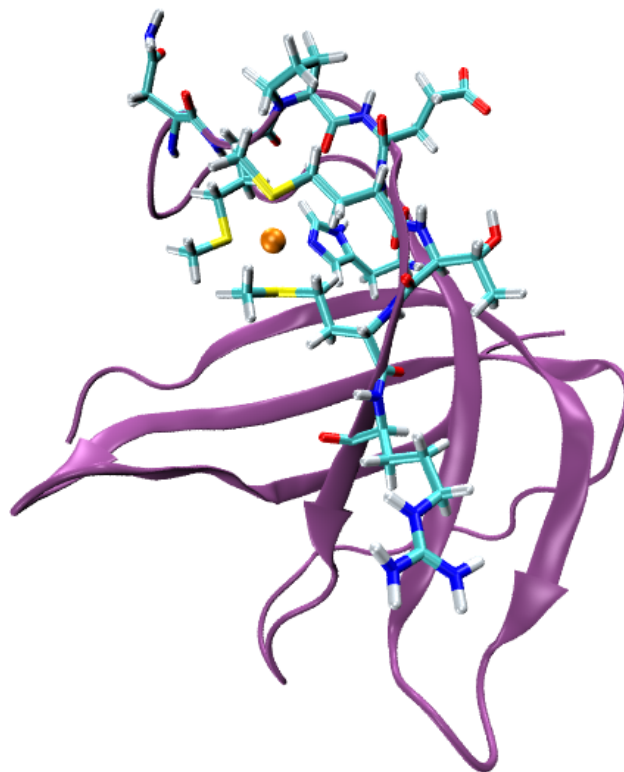

**Figure SI.4.** Ribbon depiction of Cu(I)•W44M•CusF. Residues included in the QM region are depicted in stick notation and Cu<sup>+</sup> is shown as a golden sphere.

(a)

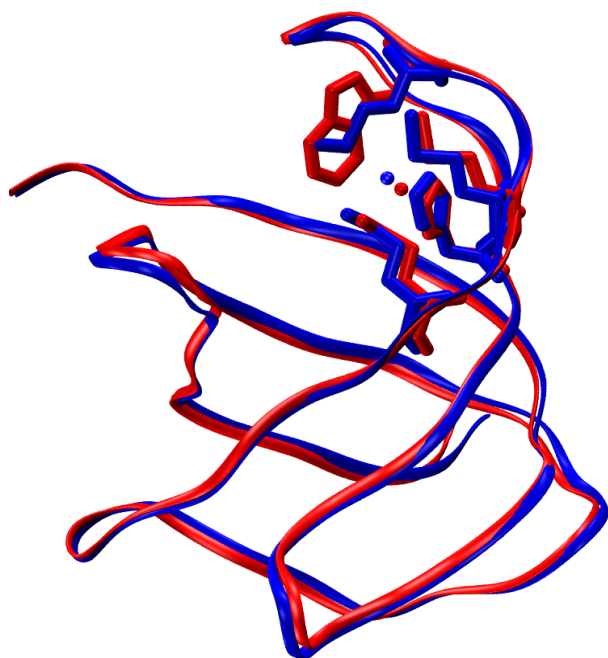

(b)

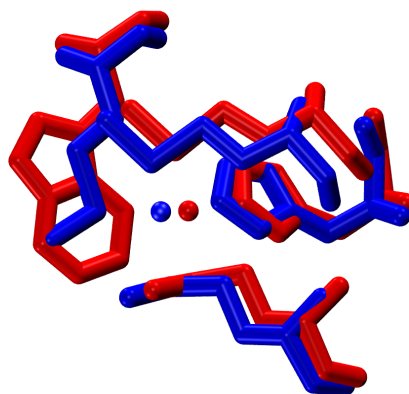

**Figure SI.5.** (a) Cartoon depiction of CusF from the 2VB2 crystal structure of Cu(I)•CusF (red) and Cu(I)•W44M•CusF (blue). The metal binding residues are depicted in stick notation. (b) Close up of the metal recognition sites of Cu(I)•CusF (red) and Cu(I)•W44M•CusF (blue).

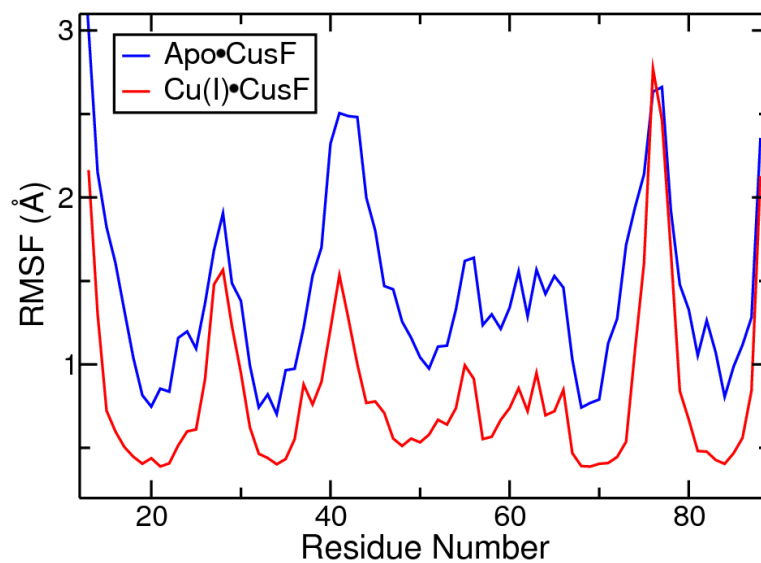

**Figure SI.6.** Root mean square fluctuations (RMSF) calculated for apo and  $\text{Cu}^+$  bound forms of CusF from MD simulations. The plot for  $\text{Cu(I)}\cdot\text{CusF}$  qualitatively matches the observed B-factors for the 2QCP crystal structure. Regions of reduced mobility are observed around residues 20, 32-34, 44-50, 57, 68-72, and 82-83.

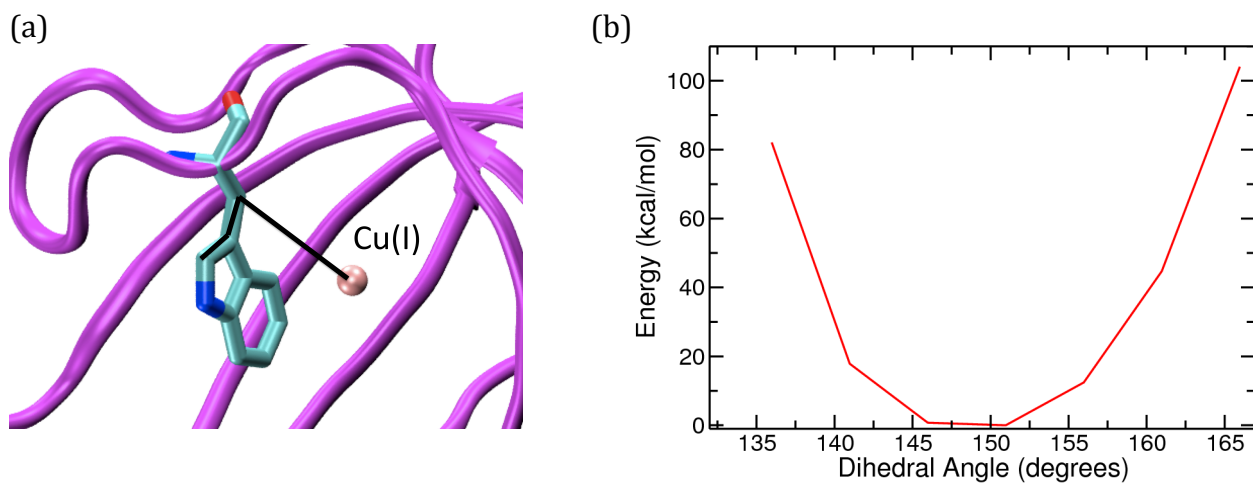

**Figure SI.7.** (a) Cartoon depiction of protein indicating the dihedral angle in black. (b) Calculated PMF to rotate W44 along the  $\text{Cu}^+ - \text{C}\beta - \text{C}\gamma - \text{C}\delta 1$  dihedral. The calculation was performed using QM/MM methodologies.

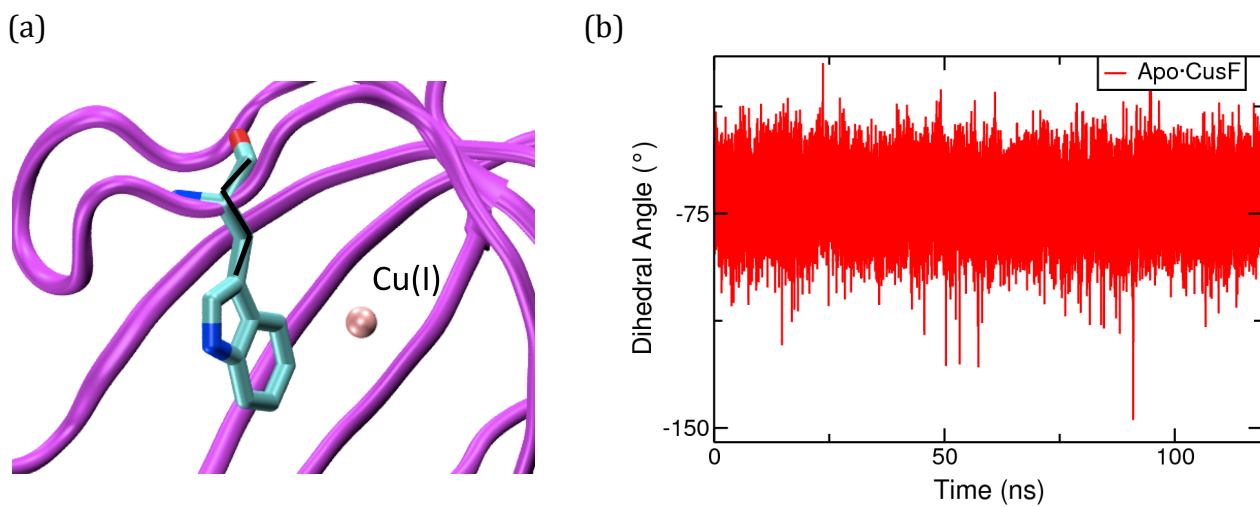

**Figure SI.8.** (a) Cartoon depiction of Trp44 C-C $\alpha$ -C $\beta$ -C $\gamma$  dihedral (black) and (b) its value over the course of our simulation of apo CusF.

## W44M mutant structure from QM/MM calculations

REMARK 888

REMARK 888 WRITTEN BY MAESTRO (A PRODUCT OF SCHRODINGER, LLC)

TITLE qsite\_entire\_protein\_free.02

MODEL 1

|      |    |      |     |   |         |        |        |      |      |   |
|------|----|------|-----|---|---------|--------|--------|------|------|---|
| ATOM | 1  | CH3  | ACE | 0 | -14.177 | -0.732 | 2.454  | 1.00 | 0.00 | C |
| ATOM | 2  | C    | ACE | 0 | -14.447 | 0.050  | 1.173  | 1.00 | 0.00 | C |
| ATOM | 3  | O    | ACE | 0 | -13.801 | -0.256 | 0.175  | 1.00 | 0.00 | O |
| ATOM | 4  | 1H   | ACE | 0 | -13.267 | -1.361 | 2.303  | 1.00 | 0.00 | H |
| ATOM | 5  | 2H   | ACE | 0 | -14.024 | -0.044 | 3.305  | 1.00 | 0.00 | H |
| ATOM | 6  | 3H   | ACE | 0 | -15.055 | -1.376 | 2.636  | 1.00 | 0.00 | H |
| ATOM | 7  | N    | PRO | 1 | -15.440 | 0.968  | 1.116  | 1.00 | 0.00 | N |
| ATOM | 8  | CA   | PRO | 1 | -15.730 | 1.717  | -0.111 | 1.00 | 0.00 | C |
| ATOM | 9  | C    | PRO | 1 | -14.987 | 3.059  | -0.125 | 1.00 | 0.00 | C |
| ATOM | 10 | O    | PRO | 1 | -14.739 | 3.620  | -1.192 | 1.00 | 0.00 | O |
| ATOM | 11 | CD   | PRO | 1 | -16.472 | 1.199  | 2.122  | 1.00 | 0.00 | C |
| ATOM | 12 | CG   | PRO | 1 | -17.679 | 1.748  | 1.352  | 1.00 | 0.00 | C |
| ATOM | 13 | CB   | PRO | 1 | -17.225 | 2.033  | -0.072 | 1.00 | 0.00 | C |
| ATOM | 14 | HD3  | PRO | 1 | -16.730 | 0.308  | 2.669  | 1.00 | 0.00 | H |
| ATOM | 15 | HD2  | PRO | 1 | -16.122 | 1.972  | 2.835  | 1.00 | 0.00 | H |
| ATOM | 16 | HG3  | PRO | 1 | -18.469 | 0.982  | 1.323  | 1.00 | 0.00 | H |
| ATOM | 17 | HG2  | PRO | 1 | -18.071 | 2.649  | 1.802  | 1.00 | 0.00 | H |
| ATOM | 18 | HB3  | PRO | 1 | -17.759 | 1.398  | -0.781 | 1.00 | 0.00 | H |
| ATOM | 19 | HB2  | PRO | 1 | -17.421 | 3.083  | -0.319 | 1.00 | 0.00 | H |
| ATOM | 20 | HA   | PRO | 1 | -15.428 | 1.153  | -0.985 | 1.00 | 0.00 | H |
| ATOM | 21 | N    | GLN | 2 | -14.663 | 3.582  | 1.067  | 1.00 | 0.00 | N |
| ATOM | 22 | CA   | GLN | 2 | -13.791 | 4.716  | 1.296  | 1.00 | 0.00 | C |
| ATOM | 23 | C    | GLN | 2 | -12.418 | 4.320  | 0.749  | 1.00 | 0.00 | C |
| ATOM | 24 | O    | GLN | 2 | -11.757 | 3.458  | 1.332  | 1.00 | 0.00 | O |
| ATOM | 25 | CB   | GLN | 2 | -13.765 | 5.028  | 2.823  | 1.00 | 0.00 | C |
| ATOM | 26 | CG   | GLN | 2 | -12.586 | 5.852  | 3.357  | 1.00 | 0.00 | C |
| ATOM | 27 | CD   | GLN | 2 | -12.339 | 5.683  | 4.868  | 1.00 | 0.00 | C |
| ATOM | 28 | OE1  | GLN | 2 | -12.614 | 4.645  | 5.468  | 1.00 | 0.00 | O |
| ATOM | 29 | NE2  | GLN | 2 | -11.854 | 6.731  | 5.523  | 1.00 | 0.00 | N |
| ATOM | 30 | H    | GLN | 2 | -14.903 | 3.035  | 1.876  | 1.00 | 0.00 | H |
| ATOM | 31 | HA   | GLN | 2 | -14.186 | 5.569  | 0.743  | 1.00 | 0.00 | H |
| ATOM | 32 | HB2  | GLN | 2 | -14.664 | 5.586  | 3.090  | 1.00 | 0.00 | H |
| ATOM | 33 | HB3  | GLN | 2 | -13.744 | 4.089  | 3.374  | 1.00 | 0.00 | H |
| ATOM | 34 | HG2  | GLN | 2 | -11.699 | 5.569  | 2.784  | 1.00 | 0.00 | H |
| ATOM | 35 | HG3  | GLN | 2 | -12.807 | 6.901  | 3.187  | 1.00 | 0.00 | H |
| ATOM | 36 | HE22 | GLN | 2 | -11.714 | 6.661  | 6.520  | 1.00 | 0.00 | H |
| ATOM | 37 | HE21 | GLN | 2 | -11.692 | 7.610  | 5.058  | 1.00 | 0.00 | H |
| ATOM | 38 | N    | VAL | 3 | -12.004 | 4.952  | -0.351 | 1.00 | 0.00 | N |
| ATOM | 39 | CA   | VAL | 3 | -10.646 | 4.827  | -0.840 | 1.00 | 0.00 | C |
| ATOM | 40 | C    | VAL | 3 | -9.783  | 5.809  | -0.051 | 1.00 | 0.00 | C |
| ATOM | 41 | O    | VAL | 3 | -10.150 | 6.977  | 0.127  | 1.00 | 0.00 | O |
| ATOM | 42 | CB   | VAL | 3 | -10.553 | 5.077  | -2.366 | 1.00 | 0.00 | C |
| ATOM | 43 | CG1  | VAL | 3 | -9.101  | 5.000  | -2.855 | 1.00 | 0.00 | C |
| ATOM | 44 | CG2  | VAL | 3 | -11.378 | 4.055  | -3.136 | 1.00 | 0.00 | C |
| ATOM | 45 | H    | VAL | 3 | -12.612 | 5.627  | -0.782 | 1.00 | 0.00 | H |
| ATOM | 46 | HA   | VAL | 3 | -10.300 | 3.828  | -0.625 | 1.00 | 0.00 | H |
| ATOM | 47 | HB   | VAL | 3 | -10.963 | 6.050  | -2.631 | 1.00 | 0.00 | H |
| ATOM | 48 | HG11 | VAL | 3 | -9.042  | 5.167  | -3.934 | 1.00 | 0.00 | H |
| ATOM | 49 | HG12 | VAL | 3 | -8.495  | 5.760  | -2.348 | 1.00 | 0.00 | H |
| ATOM | 50 | HG13 | VAL | 3 | -8.680  | 4.013  | -2.628 | 1.00 | 0.00 | H |
| ATOM | 51 | HG21 | VAL | 3 | -11.299 | 4.233  | -4.211 | 1.00 | 0.00 | H |
| ATOM | 52 | HG22 | VAL | 3 | -11.018 | 3.048  | -2.914 | 1.00 | 0.00 | H |
| ATOM | 53 | HG23 | VAL | 3 | -12.421 | 4.140  | -2.833 | 1.00 | 0.00 | H |
| ATOM | 54 | N    | ILE | 4 | -8.649  | 5.286  | 0.415  | 1.00 | 0.00 | N |
| ATOM | 55 | CA   | ILE | 4 | -7.673  | 5.971  | 1.224  | 1.00 | 0.00 | C |
| ATOM | 56 | C    | ILE | 4 | -6.411  | 6.107  | 0.409  | 1.00 | 0.00 | C |
| ATOM | 57 | O    | ILE | 4 | -5.802  | 5.095  | 0.072  | 1.00 | 0.00 | O |
| ATOM | 58 | CB   | ILE | 4 | -7.415  | 5.228  | 2.563  | 1.00 | 0.00 | C |
| ATOM | 59 | CG2  | ILE | 4 | -6.395  | 6.018  | 3.419  | 1.00 | 0.00 | C |

|      |     |          |   |        |        |        |      |      |   |
|------|-----|----------|---|--------|--------|--------|------|------|---|
| ATOM | 60  | CG1 ILE  | 4 | -8.722 | 5.005  | 3.319  | 1.00 | 0.00 | C |
| ATOM | 61  | CD1 ILE  | 4 | -8.644 | 3.947  | 4.393  | 1.00 | 0.00 | C |
| ATOM | 62  | H ILE    | 4 | -8.473 | 4.292  | 0.264  | 1.00 | 0.00 | H |
| ATOM | 63  | HA ILE   | 4 | -8.020 | 6.967  | 1.400  | 1.00 | 0.00 | H |
| ATOM | 64  | HB ILE   | 4 | -7.048 | 4.214  | 2.380  | 1.00 | 0.00 | H |
| ATOM | 65  | HG21 ILE | 4 | -6.194 | 5.512  | 4.370  | 1.00 | 0.00 | H |
| ATOM | 66  | HG22 ILE | 4 | -5.437 | 6.135  | 2.884  | 1.00 | 0.00 | H |
| ATOM | 67  | HG23 ILE | 4 | -6.780 | 7.026  | 3.639  | 1.00 | 0.00 | H |
| ATOM | 68  | HG12 ILE | 4 | -9.032 | 5.922  | 3.796  | 1.00 | 0.00 | H |
| ATOM | 69  | HG13 ILE | 4 | -9.476 | 4.674  | 2.608  | 1.00 | 0.00 | H |
| ATOM | 70  | HD11 ILE | 4 | -9.625 | 3.847  | 4.863  | 1.00 | 0.00 | H |
| ATOM | 71  | HD12 ILE | 4 | -8.355 | 2.995  | 3.952  | 1.00 | 0.00 | H |
| ATOM | 72  | HD13 ILE | 4 | -7.912 | 4.242  | 5.141  | 1.00 | 0.00 | H |
| ATOM | 73  | N SER    | 5 | -6.020 | 7.355  | 0.143  | 1.00 | 0.00 | N |
| ATOM | 74  | CA SER   | 5 | -4.762 | 7.664  | -0.490 | 1.00 | 0.00 | C |
| ATOM | 75  | C SER    | 5 | -3.682 | 7.900  | 0.559  | 1.00 | 0.00 | C |
| ATOM | 76  | O SER    | 5 | -3.932 | 8.487  | 1.616  | 1.00 | 0.00 | O |
| ATOM | 77  | CB SER   | 5 | -4.890 | 8.917  | -1.364 | 1.00 | 0.00 | C |
| ATOM | 78  | OG SER   | 5 | -6.027 | 8.907  | -2.217 | 1.00 | 0.00 | O |
| ATOM | 79  | H SER    | 5 | -6.578 | 8.133  | 0.452  | 1.00 | 0.00 | H |
| ATOM | 80  | HA SER   | 5 | -4.443 | 6.812  | -1.037 | 1.00 | 0.00 | H |
| ATOM | 81  | HB2 SER  | 5 | -4.995 | 9.796  | -0.738 | 1.00 | 0.00 | H |
| ATOM | 82  | HB3 SER  | 5 | -3.972 | 9.004  | -1.959 | 1.00 | 0.00 | H |
| ATOM | 83  | HG SER   | 5 | -6.024 | 8.080  | -2.717 | 1.00 | 0.00 | H |
| ATOM | 84  | N ALA    | 6 | -2.481 | 7.418  | 0.236  | 1.00 | 0.00 | N |
| ATOM | 85  | CA ALA   | 6 | -1.305 | 7.474  | 1.067  | 1.00 | 0.00 | C |
| ATOM | 86  | C ALA    | 6 | -0.034 | 7.551  | 0.233  | 1.00 | 0.00 | C |
| ATOM | 87  | O ALA    | 6 | -0.016 | 7.247  | -0.964 | 1.00 | 0.00 | O |
| ATOM | 88  | CB ALA   | 6 | -1.292 | 6.277  | 2.017  | 1.00 | 0.00 | C |
| ATOM | 89  | H ALA    | 6 | -2.370 | 6.912  | -0.643 | 1.00 | 0.00 | H |
| ATOM | 90  | HA ALA   | 6 | -1.354 | 8.395  | 1.641  | 1.00 | 0.00 | H |
| ATOM | 91  | HB1 ALA  | 6 | -0.428 | 6.338  | 2.683  | 1.00 | 0.00 | H |
| ATOM | 92  | HB2 ALA  | 6 | -2.205 | 6.256  | 2.615  | 1.00 | 0.00 | H |
| ATOM | 93  | HB3 ALA  | 6 | -1.226 | 5.349  | 1.437  | 1.00 | 0.00 | H |
| ATOM | 94  | N THR    | 7 | 1.051  | 7.907  | 0.914  | 1.00 | 0.00 | N |
| ATOM | 95  | CA THR   | 7 | 2.414  | 7.811  | 0.446  | 1.00 | 0.00 | C |
| ATOM | 96  | C THR    | 7 | 3.216  | 7.004  | 1.451  | 1.00 | 0.00 | C |
| ATOM | 97  | O THR    | 7 | 2.815  | 6.842  | 2.606  | 1.00 | 0.00 | O |
| ATOM | 98  | CB THR   | 7 | 2.995  | 9.218  | 0.190  | 1.00 | 0.00 | C |
| ATOM | 99  | CG2 THR  | 7 | 2.295  | 9.901  | -0.974 | 1.00 | 0.00 | C |
| ATOM | 100 | OG1 THR  | 7 | 2.865  | 10.086 | 1.300  | 1.00 | 0.00 | O |
| ATOM | 101 | H THR    | 7 | 0.967  | 8.151  | 1.891  | 1.00 | 0.00 | H |
| ATOM | 102 | HA THR   | 7 | 2.424  | 7.228  | -0.475 | 1.00 | 0.00 | H |
| ATOM | 103 | HB THR   | 7 | 4.070  | 9.129  | -0.030 | 1.00 | 0.00 | H |
| ATOM | 104 | HG21 THR | 7 | 2.720  | 10.892 | -1.132 | 1.00 | 0.00 | H |
| ATOM | 105 | HG22 THR | 7 | 2.405  | 9.309  | -1.883 | 1.00 | 0.00 | H |
| ATOM | 106 | HG23 THR | 7 | 1.227  | 10.004 | -0.744 | 1.00 | 0.00 | H |
| ATOM | 107 | HG1 THR  | 7 | 3.568  | 9.857  | 1.944  | 1.00 | 0.00 | H |
| ATOM | 108 | N GLY    | 8 | 4.336  | 6.464  | 0.981  | 1.00 | 0.00 | N |
| ATOM | 109 | CA GLY   | 8 | 5.273  | 5.775  | 1.827  | 1.00 | 0.00 | C |
| ATOM | 110 | C GLY    | 8 | 6.449  | 5.272  | 1.043  | 1.00 | 0.00 | C |
| ATOM | 111 | O GLY    | 8 | 6.520  | 5.483  | -0.170 | 1.00 | 0.00 | O |
| ATOM | 112 | H GLY    | 8 | 4.554  | 6.483  | -0.006 | 1.00 | 0.00 | H |
| ATOM | 113 | HA2 GLY  | 8 | 5.638  | 6.414  | 2.626  | 1.00 | 0.00 | H |
| ATOM | 114 | HA3 GLY  | 8 | 4.793  | 4.899  | 2.227  | 1.00 | 0.00 | H |
| ATOM | 115 | N VAL    | 9 | 7.348  | 4.595  | 1.750  | 1.00 | 0.00 | N |
| ATOM | 116 | CA VAL   | 9 | 8.480  | 3.895  | 1.183  | 1.00 | 0.00 | C |
| ATOM | 117 | C VAL    | 9 | 8.208  | 2.400  | 1.297  | 1.00 | 0.00 | C |
| ATOM | 118 | O VAL    | 9 | 7.796  | 1.909  | 2.353  | 1.00 | 0.00 | O |
| ATOM | 119 | CB VAL   | 9 | 9.793  | 4.327  | 1.880  | 1.00 | 0.00 | C |
| ATOM | 120 | CG1 VAL  | 9 | 10.996 | 3.512  | 1.398  | 1.00 | 0.00 | C |
| ATOM | 121 | CG2 VAL  | 9 | 10.070 | 5.800  | 1.630  | 1.00 | 0.00 | C |
| ATOM | 122 | H VAL    | 9 | 7.157  | 4.449  | 2.739  | 1.00 | 0.00 | H |
| ATOM | 123 | HA VAL   | 9 | 8.554  | 4.121  | 0.129  | 1.00 | 0.00 | H |
| ATOM | 124 | HB VAL   | 9 | 9.712  | 4.233  | 2.961  | 1.00 | 0.00 | H |
| ATOM | 125 | HG11 VAL | 9 | 11.912 | 3.842  | 1.896  | 1.00 | 0.00 | H |

|      |     |          |    |        |        |        |      |      |     |
|------|-----|----------|----|--------|--------|--------|------|------|-----|
| ATOM | 126 | HG12 VAL | 9  | 10.835 | 2.453  | 1.615  | 1.00 | 0.00 | H   |
| ATOM | 127 | HG13 VAL | 9  | 11.119 | 3.636  | 0.316  | 1.00 | 0.00 | H   |
| ATOM | 128 | HG21 VAL | 9  | 10.998 | 6.100  | 2.122  | 1.00 | 0.00 | H   |
| ATOM | 129 | HG22 VAL | 9  | 10.157 | 5.978  | 0.559  | 1.00 | 0.00 | H   |
| ATOM | 130 | HG23 VAL | 9  | 9.243  | 6.384  | 2.031  | 1.00 | 0.00 | H   |
| ATOM | 131 | N VAL    | 10 | 8.465  | 1.687  | 0.196  | 1.00 | 0.00 | N   |
| ATOM | 132 | CA VAL   | 10 | 8.402  | 0.242  | 0.136  | 1.00 | 0.00 | C   |
| ATOM | 133 | C VAL    | 10 | 9.574  | -0.358 | 0.916  | 1.00 | 0.00 | C   |
| ATOM | 134 | O VAL    | 10 | 10.733 | -0.023 | 0.668  | 1.00 | 0.00 | O   |
| ATOM | 135 | CB VAL   | 10 | 8.373  | -0.247 | -1.336 | 1.00 | 0.00 | C   |
| ATOM | 136 | CG1 VAL  | 10 | 8.367  | -1.776 | -1.409 | 1.00 | 0.00 | C   |
| ATOM | 137 | CG2 VAL  | 10 | 7.158  | 0.279  | -2.088 | 1.00 | 0.00 | C   |
| ATOM | 138 | H VAL    | 10 | 8.806  | 2.178  | -0.629 | 1.00 | 0.00 | H   |
| ATOM | 139 | HA VAL   | 10 | 7.504  | -0.061 | 0.652  | 1.00 | 0.00 | H   |
| ATOM | 140 | HB VAL   | 10 | 9.229  | 0.132  | -1.894 | 1.00 | 0.00 | H   |
| ATOM | 141 | HG11 VAL | 10 | 8.345  | -2.111 | -2.448 | 1.00 | 0.00 | H   |
| ATOM | 142 | HG12 VAL | 10 | 9.265  | -2.170 | -0.926 | 1.00 | 0.00 | H   |
| ATOM | 143 | HG13 VAL | 10 | 7.485  | -2.166 | -0.891 | 1.00 | 0.00 | H   |
| ATOM | 144 | HG21 VAL | 10 | 7.157  | -0.094 | -3.119 | 1.00 | 0.00 | H   |
| ATOM | 145 | HG22 VAL | 10 | 6.245  | -0.048 | -1.591 | 1.00 | 0.00 | H   |
| ATOM | 146 | HG23 VAL | 10 | 7.193  | 1.368  | -2.105 | 1.00 | 0.00 | H   |
| ATOM | 147 | N LYS    | 11 | 9.246  | -1.263 | 1.841  | 1.00 | 0.00 | N   |
| ATOM | 148 | CA LYS   | 11 | 10.203 | -1.937 | 2.699  | 1.00 | 0.00 | C   |
| ATOM | 149 | C LYS    | 11 | 10.363 | -3.422 | 2.382  | 1.00 | 0.00 | C   |
| ATOM | 150 | O LYS    | 11 | 11.344 | -4.037 | 2.799  | 1.00 | 0.00 | O   |
| ATOM | 151 | CB LYS   | 11 | 9.751  | -1.817 | 4.160  | 1.00 | 0.00 | C   |
| ATOM | 152 | CG LYS   | 11 | 9.611  | -0.390 | 4.662  | 1.00 | 0.00 | C   |
| ATOM | 153 | CD LYS   | 11 | 9.662  | -0.325 | 6.182  | 1.00 | 0.00 | C   |
| ATOM | 154 | CE LYS   | 11 | 11.037 | -0.689 | 6.744  | 1.00 | 0.00 | C   |
| ATOM | 155 | NZ LYS   | 11 | 12.102 | 0.232  | 6.301  | 1.00 | 0.00 | N1+ |
| ATOM | 156 | H LYS    | 11 | 8.259  | -1.487 | 1.960  | 1.00 | 0.00 | H   |
| ATOM | 157 | HA LYS   | 11 | 11.171 | -1.490 | 2.546  | 1.00 | 0.00 | H   |
| ATOM | 158 | HB2 LYS  | 11 | 8.784  | -2.302 | 4.290  | 1.00 | 0.00 | H   |
| ATOM | 159 | HB3 LYS  | 11 | 10.490 | -2.306 | 4.799  | 1.00 | 0.00 | H   |
| ATOM | 160 | HG2 LYS  | 11 | 10.426 | 0.208  | 4.265  | 1.00 | 0.00 | H   |
| ATOM | 161 | HG3 LYS  | 11 | 8.658  | 0.011  | 4.315  | 1.00 | 0.00 | H   |
| ATOM | 162 | HD2 LYS  | 11 | 9.414  | 0.690  | 6.491  | 1.00 | 0.00 | H   |
| ATOM | 163 | HD3 LYS  | 11 | 8.907  | -1.013 | 6.585  | 1.00 | 0.00 | H   |
| ATOM | 164 | HE2 LYS  | 11 | 10.981 | -0.630 | 7.829  | 1.00 | 0.00 | H   |
| ATOM | 165 | HE3 LYS  | 11 | 11.257 | -1.721 | 6.451  | 1.00 | 0.00 | H   |
| ATOM | 166 | HZ1 LYS  | 11 | 13.010 | -0.101 | 6.603  | 1.00 | 0.00 | H   |
| ATOM | 167 | HZ2 LYS  | 11 | 12.170 | 0.365  | 5.293  | 1.00 | 0.00 | H   |
| ATOM | 168 | HZ3 LYS  | 11 | 11.968 | 1.166  | 6.706  | 1.00 | 0.00 | H   |
| ATOM | 169 | N GLY    | 12 | 9.397  | -4.019 | 1.693  | 1.00 | 0.00 | N   |
| ATOM | 170 | CA GLY   | 12 | 9.479  | -5.403 | 1.288  | 1.00 | 0.00 | C   |
| ATOM | 171 | C GLY    | 12 | 8.382  | -5.689 | 0.290  | 1.00 | 0.00 | C   |
| ATOM | 172 | O GLY    | 12 | 7.282  | -5.141 | 0.420  | 1.00 | 0.00 | O   |
| ATOM | 173 | H GLY    | 12 | 8.605  | -3.489 | 1.355  | 1.00 | 0.00 | H   |
| ATOM | 174 | HA2 GLY  | 12 | 10.454 | -5.608 | 0.840  | 1.00 | 0.00 | H   |
| ATOM | 175 | HA3 GLY  | 12 | 9.338  | -6.042 | 2.156  | 1.00 | 0.00 | H   |
| ATOM | 176 | N ILE    | 13 | 8.672  | -6.568 | -0.667 | 1.00 | 0.00 | N   |
| ATOM | 177 | CA ILE   | 13 | 7.725  | -7.069 | -1.641 | 1.00 | 0.00 | C   |
| ATOM | 178 | C ILE    | 13 | 7.745  | -8.588 | -1.533 | 1.00 | 0.00 | C   |
| ATOM | 179 | O ILE    | 13 | 8.812  | -9.195 | -1.619 | 1.00 | 0.00 | O   |
| ATOM | 180 | CB ILE   | 13 | 8.034  | -6.548 | -3.075 | 1.00 | 0.00 | C   |
| ATOM | 181 | CG2 ILE  | 13 | 7.021  | -7.118 | -4.090 | 1.00 | 0.00 | C   |
| ATOM | 182 | CG1 ILE  | 13 | 8.072  | -5.027 | -3.152 | 1.00 | 0.00 | C   |
| ATOM | 183 | CD1 ILE  | 13 | 8.681  | -4.507 | -4.437 | 1.00 | 0.00 | C   |
| ATOM | 184 | H ILE    | 13 | 9.574  | -7.024 | -0.677 | 1.00 | 0.00 | H   |
| ATOM | 185 | HA ILE   | 13 | 6.732  | -6.750 | -1.347 | 1.00 | 0.00 | H   |
| ATOM | 186 | HB ILE   | 13 | 9.049  | -6.813 | -3.371 | 1.00 | 0.00 | H   |
| ATOM | 187 | HG21 ILE | 13 | 7.238  | -6.758 | -5.102 | 1.00 | 0.00 | H   |
| ATOM | 188 | HG22 ILE | 13 | 7.051  | -8.215 | -4.097 | 1.00 | 0.00 | H   |
| ATOM | 189 | HG23 ILE | 13 | 6.003  | -6.804 | -3.821 | 1.00 | 0.00 | H   |
| ATOM | 190 | HG12 ILE | 13 | 7.071  | -4.628 | -3.084 | 1.00 | 0.00 | H   |
| ATOM | 191 | HG13 ILE | 13 | 8.686  | -4.660 | -2.336 | 1.00 | 0.00 | H   |

|      |     |      |     |    |        |         |        |      |      |     |
|------|-----|------|-----|----|--------|---------|--------|------|------|-----|
| ATOM | 192 | HD11 | ILE | 13 | 8.694  | -3.414  | -4.417 | 1.00 | 0.00 | H   |
| ATOM | 193 | HD12 | ILE | 13 | 9.705  | -4.873  | -4.544 | 1.00 | 0.00 | H   |
| ATOM | 194 | HD13 | ILE | 13 | 8.090  | -4.841  | -5.292 | 1.00 | 0.00 | H   |
| ATOM | 195 | N    | ASP | 14 | 6.559  | -9.178  | -1.372 | 1.00 | 0.00 | N   |
| ATOM | 196 | CA   | ASP | 14 | 6.332  | -10.608 | -1.365 | 1.00 | 0.00 | C   |
| ATOM | 197 | C    | ASP | 14 | 5.071  | -10.887 | -2.170 | 1.00 | 0.00 | C   |
| ATOM | 198 | O    | ASP | 14 | 3.964  | -10.784 | -1.642 | 1.00 | 0.00 | O   |
| ATOM | 199 | CB   | ASP | 14 | 6.252  | -11.121 | 0.082  | 1.00 | 0.00 | C   |
| ATOM | 200 | CG   | ASP | 14 | 6.337  | -12.625 | 0.180  | 1.00 | 0.00 | C   |
| ATOM | 201 | OD1  | ASP | 14 | 5.454  | -13.288 | -0.412 | 1.00 | 0.00 | O   |
| ATOM | 202 | OD2  | ASP | 14 | 7.115  | -13.051 | 1.053  | 1.00 | 0.00 | O1- |
| ATOM | 203 | H    | ASP | 14 | 5.729  | -8.606  | -1.231 | 1.00 | 0.00 | H   |
| ATOM | 204 | HA   | ASP | 14 | 7.164  | -11.080 | -1.882 | 1.00 | 0.00 | H   |
| ATOM | 205 | HB2  | ASP | 14 | 7.041  | -10.693 | 0.705  | 1.00 | 0.00 | H   |
| ATOM | 206 | HB3  | ASP | 14 | 5.280  | -10.875 | 0.520  | 1.00 | 0.00 | H   |
| ATOM | 207 | N    | LEU | 15 | 5.202  | -11.208 | -3.459 | 1.00 | 0.00 | N   |
| ATOM | 208 | CA   | LEU | 15 | 4.035  | -11.441 | -4.303 | 1.00 | 0.00 | C   |
| ATOM | 209 | C    | LEU | 15 | 3.493  | -12.869 | -4.167 | 1.00 | 0.00 | C   |
| ATOM | 210 | O    | LEU | 15 | 2.368  | -13.131 | -4.603 | 1.00 | 0.00 | O   |
| ATOM | 211 | CB   | LEU | 15 | 4.376  | -11.221 | -5.790 | 1.00 | 0.00 | C   |
| ATOM | 212 | CG   | LEU | 15 | 5.120  | -9.959  | -6.220 | 1.00 | 0.00 | C   |
| ATOM | 213 | CD1  | LEU | 15 | 5.598  | -10.166 | -7.658 | 1.00 | 0.00 | C   |
| ATOM | 214 | CD2  | LEU | 15 | 4.296  | -8.698  | -6.123 | 1.00 | 0.00 | C   |
| ATOM | 215 | H    | LEU | 15 | 6.123  | -11.303 | -3.860 | 1.00 | 0.00 | H   |
| ATOM | 216 | HA   | LEU | 15 | 3.219  | -10.813 | -3.958 | 1.00 | 0.00 | H   |
| ATOM | 217 | HB2  | LEU | 15 | 4.990  | -12.056 | -6.135 | 1.00 | 0.00 | H   |
| ATOM | 218 | HB3  | LEU | 15 | 3.444  | -11.202 | -6.350 | 1.00 | 0.00 | H   |
| ATOM | 219 | HG   | LEU | 15 | 5.950  | -9.772  | -5.563 | 1.00 | 0.00 | H   |
| ATOM | 220 | HD11 | LEU | 15 | 6.136  | -9.284  | -8.002 | 1.00 | 0.00 | H   |
| ATOM | 221 | HD12 | LEU | 15 | 6.263  | -11.037 | -7.721 | 1.00 | 0.00 | H   |
| ATOM | 222 | HD13 | LEU | 15 | 4.739  | -10.340 | -8.320 | 1.00 | 0.00 | H   |
| ATOM | 223 | HD21 | LEU | 15 | 4.894  | -7.852  | -6.472 | 1.00 | 0.00 | H   |
| ATOM | 224 | HD22 | LEU | 15 | 3.403  | -8.788  | -6.733 | 1.00 | 0.00 | H   |
| ATOM | 225 | HD23 | LEU | 15 | 4.026  | -8.547  | -5.083 | 1.00 | 0.00 | H   |
| ATOM | 226 | N    | GLU | 16 | 4.235  | -13.768 | -3.510 | 1.00 | 0.00 | N   |
| ATOM | 227 | CA   | GLU | 16 | 3.786  | -15.115 | -3.196 | 1.00 | 0.00 | C   |
| ATOM | 228 | C    | GLU | 16 | 2.699  | -15.038 | -2.124 | 1.00 | 0.00 | C   |
| ATOM | 229 | O    | GLU | 16 | 1.594  | -15.561 | -2.318 | 1.00 | 0.00 | O   |
| ATOM | 230 | CB   | GLU | 16 | 4.994  | -15.972 | -2.758 | 1.00 | 0.00 | C   |
| ATOM | 231 | CG   | GLU | 16 | 4.784  | -17.475 | -2.958 | 1.00 | 0.00 | C   |
| ATOM | 232 | CD   | GLU | 16 | 5.980  | -18.187 | -3.589 | 1.00 | 0.00 | C   |
| ATOM | 233 | OE1  | GLU | 16 | 6.441  | -17.718 | -4.652 | 1.00 | 0.00 | O   |
| ATOM | 234 | OE2  | GLU | 16 | 6.445  | -19.195 | -3.017 | 1.00 | 0.00 | O1- |
| ATOM | 235 | H    | GLU | 16 | 5.110  | -13.473 | -3.099 | 1.00 | 0.00 | H   |
| ATOM | 236 | HA   | GLU | 16 | 3.287  | -15.530 | -4.054 | 1.00 | 0.00 | H   |
| ATOM | 237 | HB2  | GLU | 16 | 5.890  | -15.695 | -3.326 | 1.00 | 0.00 | H   |
| ATOM | 238 | HB3  | GLU | 16 | 5.184  | -15.805 | -1.696 | 1.00 | 0.00 | H   |
| ATOM | 239 | HG2  | GLU | 16 | 4.575  | -17.920 | -1.991 | 1.00 | 0.00 | H   |
| ATOM | 240 | HG3  | GLU | 16 | 3.930  | -17.610 | -3.620 | 1.00 | 0.00 | H   |
| ATOM | 241 | N    | SER | 17 | 2.967  | -14.268 | -1.065 | 1.00 | 0.00 | N   |
| ATOM | 242 | CA   | SER | 17 | 2.001  | -13.977 | -0.028 | 1.00 | 0.00 | C   |
| ATOM | 243 | C    | SER | 17 | 1.030  | -12.849 | -0.368 | 1.00 | 0.00 | C   |
| ATOM | 244 | O    | SER | 17 | 0.024  | -12.724 | 0.344  | 1.00 | 0.00 | O   |
| ATOM | 245 | CB   | SER | 17 | 2.751  | -13.663 | 1.270  | 1.00 | 0.00 | C   |
| ATOM | 246 | OG   | SER | 17 | 3.472  | -12.460 | 1.193  | 1.00 | 0.00 | O   |
| ATOM | 247 | H    | SER | 17 | 3.924  | -13.906 | -0.942 | 1.00 | 0.00 | H   |
| ATOM | 248 | HA   | SER | 17 | 1.368  | -14.839 | 0.088  | 1.00 | 0.00 | H   |
| ATOM | 249 | HB2  | SER | 17 | 2.035  | -13.539 | 2.073  | 1.00 | 0.00 | H   |
| ATOM | 250 | HB3  | SER | 17 | 3.435  | -14.481 | 1.507  | 1.00 | 0.00 | H   |
| ATOM | 251 | HG   | SER | 17 | 4.226  | -12.652 | 0.616  | 1.00 | 0.00 | H   |
| ATOM | 252 | N    | LYS | 18 | 1.309  | -12.079 | -1.436 | 1.00 | 0.00 | N   |
| ATOM | 253 | CA   | LYS | 18 | 0.514  | -10.976 | -1.983 | 1.00 | 0.00 | C   |
| ATOM | 254 | C    | LYS | 18 | 0.660  | -9.702  | -1.164 | 1.00 | 0.00 | C   |
| ATOM | 255 | O    | LYS | 18 | -0.293 | -8.934  | -1.059 | 1.00 | 0.00 | O   |
| ATOM | 256 | CB   | LYS | 18 | -0.957 | -11.393 | -2.194 | 1.00 | 0.00 | C   |
| ATOM | 257 | CG   | LYS | 18 | -1.206 | -12.332 | -3.362 | 1.00 | 0.00 | C   |

|      |     |      |     |    |        |         |        |      |      |     |
|------|-----|------|-----|----|--------|---------|--------|------|------|-----|
| ATOM | 258 | CD   | LYS | 18 | -2.497 | -13.120 | -3.161 | 1.00 | 0.00 | C   |
| ATOM | 259 | CE   | LYS | 18 | -2.559 | -14.334 | -4.081 | 1.00 | 0.00 | C   |
| ATOM | 260 | NZ   | LYS | 18 | -1.582 | -15.359 | -3.652 | 1.00 | 0.00 | N1+ |
| ATOM | 261 | H    | LYS | 18 | 2.229  | -12.224 | -1.834 | 1.00 | 0.00 | H   |
| ATOM | 262 | HA   | LYS | 18 | 0.944  | -10.626 | -2.925 | 1.00 | 0.00 | H   |
| ATOM | 263 | HB2  | LYS | 18 | -1.322 | -11.898 | -1.295 | 1.00 | 0.00 | H   |
| ATOM | 264 | HB3  | LYS | 18 | -1.548 | -10.496 | -2.368 | 1.00 | 0.00 | H   |
| ATOM | 265 | HG2  | LYS | 18 | -1.286 | -11.749 | -4.279 | 1.00 | 0.00 | H   |
| ATOM | 266 | HG3  | LYS | 18 | -0.379 | -13.034 | -3.445 | 1.00 | 0.00 | H   |
| ATOM | 267 | HD2  | LYS | 18 | -2.547 | -13.458 | -2.122 | 1.00 | 0.00 | H   |
| ATOM | 268 | HD3  | LYS | 18 | -3.348 | -12.457 | -3.356 | 1.00 | 0.00 | H   |
| ATOM | 269 | HE2  | LYS | 18 | -3.609 | -14.666 | -4.126 | 1.00 | 0.00 | H   |
| ATOM | 270 | HE3  | LYS | 18 | -2.247 | -14.029 | -5.078 | 1.00 | 0.00 | H   |
| ATOM | 271 | HZ1  | LYS | 18 | -1.611 | -16.226 | -4.172 | 1.00 | 0.00 | H   |
| ATOM | 272 | HZ2  | LYS | 18 | -0.645 | -15.010 | -3.809 | 1.00 | 0.00 | H   |
| ATOM | 273 | HZ3  | LYS | 18 | -1.633 | -15.595 | -2.654 | 1.00 | 0.00 | H   |
| ATOM | 274 | N    | LYS | 19 | 1.825  | -9.489  | -0.556 | 1.00 | 0.00 | N   |
| ATOM | 275 | CA   | LYS | 19 | 2.040  | -8.442  | 0.411  | 1.00 | 0.00 | C   |
| ATOM | 276 | C    | LYS | 19 | 3.118  | -7.477  | -0.046 | 1.00 | 0.00 | C   |
| ATOM | 277 | O    | LYS | 19 | 4.229  | -7.881  | -0.391 | 1.00 | 0.00 | O   |
| ATOM | 278 | CB   | LYS | 19 | 2.423  | -9.054  | 1.771  | 1.00 | 0.00 | C   |
| ATOM | 279 | CG   | LYS | 19 | 1.421  | -10.043 | 2.357  | 1.00 | 0.00 | C   |
| ATOM | 280 | CD   | LYS | 19 | 0.117  | -9.383  | 2.782  | 1.00 | 0.00 | C   |
| ATOM | 281 | CE   | LYS | 19 | -0.864 | -10.442 | 3.265  | 1.00 | 0.00 | C   |
| ATOM | 282 | NZ   | LYS | 19 | -2.182 | -9.910  | 3.608  | 1.00 | 0.00 | N1+ |
| ATOM | 283 | H    | LYS | 19 | 2.620  | -10.093 | -0.776 | 1.00 | 0.00 | H   |
| ATOM | 284 | HA   | LYS | 19 | 1.133  | -7.860  | 0.485  | 1.00 | 0.00 | H   |
| ATOM | 285 | HB2  | LYS | 19 | 3.379  | -9.578  | 1.673  | 1.00 | 0.00 | H   |
| ATOM | 286 | HB3  | LYS | 19 | 2.526  | -8.248  | 2.492  | 1.00 | 0.00 | H   |
| ATOM | 287 | HG2  | LYS | 19 | 1.208  | -10.811 | 1.611  | 1.00 | 0.00 | H   |
| ATOM | 288 | HG3  | LYS | 19 | 1.881  | -10.518 | 3.232  | 1.00 | 0.00 | H   |
| ATOM | 289 | HD2  | LYS | 19 | 0.332  | -8.677  | 3.582  | 1.00 | 0.00 | H   |
| ATOM | 290 | HD3  | LYS | 19 | -0.293 | -8.852  | 1.925  | 1.00 | 0.00 | H   |
| ATOM | 291 | HE2  | LYS | 19 | -0.953 | -11.211 | 2.500  | 1.00 | 0.00 | H   |
| ATOM | 292 | HE3  | LYS | 19 | -0.484 | -10.878 | 4.184  | 1.00 | 0.00 | H   |
| ATOM | 293 | HZ1  | LYS | 19 | -2.827 | -10.700 | 3.714  | 1.00 | 0.00 | H   |
| ATOM | 294 | HZ2  | LYS | 19 | -2.097 | -9.462  | 4.529  | 1.00 | 0.00 | H   |
| ATOM | 295 | HZ3  | LYS | 19 | -2.549 | -9.248  | 2.925  | 1.00 | 0.00 | H   |
| ATOM | 296 | N    | ILE | 20 | 2.794  | -6.188  | 0.042  | 1.00 | 0.00 | N   |
| ATOM | 297 | CA   | ILE | 20 | 3.751  | -5.108  | -0.034 | 1.00 | 0.00 | C   |
| ATOM | 298 | C    | ILE | 20 | 3.814  | -4.499  | 1.350  | 1.00 | 0.00 | C   |
| ATOM | 299 | O    | ILE | 20 | 2.799  | -4.027  | 1.857  | 1.00 | 0.00 | O   |
| ATOM | 300 | CB   | ILE | 20 | 3.371  | -4.054  | -1.096 | 1.00 | 0.00 | C   |
| ATOM | 301 | CG2  | ILE | 20 | 4.516  | -3.013  | -1.233 | 1.00 | 0.00 | C   |
| ATOM | 302 | CG1  | ILE | 20 | 3.014  | -4.690  | -2.432 | 1.00 | 0.00 | C   |
| ATOM | 303 | CD1  | ILE | 20 | 4.154  | -5.425  | -3.079 | 1.00 | 0.00 | C   |
| ATOM | 304 | H    | ILE | 20 | 1.839  | -5.935  | 0.293  | 1.00 | 0.00 | H   |
| ATOM | 305 | HA   | ILE | 20 | 4.720  | -5.504  | -0.265 | 1.00 | 0.00 | H   |
| ATOM | 306 | HB   | ILE | 20 | 2.423  | -3.584  | -0.837 | 1.00 | 0.00 | H   |
| ATOM | 307 | HG21 | ILE | 20 | 4.277  | -2.259  | -1.988 | 1.00 | 0.00 | H   |
| ATOM | 308 | HG22 | ILE | 20 | 4.709  | -2.497  | -0.278 | 1.00 | 0.00 | H   |
| ATOM | 309 | HG23 | ILE | 20 | 5.457  | -3.511  | -1.535 | 1.00 | 0.00 | H   |
| ATOM | 310 | HG12 | ILE | 20 | 2.209  | -5.406  | -2.265 | 1.00 | 0.00 | H   |
| ATOM | 311 | HG13 | ILE | 20 | 2.683  | -3.918  | -3.118 | 1.00 | 0.00 | H   |
| ATOM | 312 | HD11 | ILE | 20 | 3.814  | -5.858  | -4.021 | 1.00 | 0.00 | H   |
| ATOM | 313 | HD12 | ILE | 20 | 4.974  | -4.735  | -3.273 | 1.00 | 0.00 | H   |
| ATOM | 314 | HD13 | ILE | 20 | 4.501  | -6.224  | -2.421 | 1.00 | 0.00 | H   |
| ATOM | 315 | N    | THR | 21 | 5.002  | -4.503  | 1.951  | 1.00 | 0.00 | N   |
| ATOM | 316 | CA   | THR | 21 | 5.227  | -3.817  | 3.204  | 1.00 | 0.00 | C   |
| ATOM | 317 | C    | THR | 21 | 5.643  | -2.387  | 2.871  | 1.00 | 0.00 | C   |
| ATOM | 318 | O    | THR | 21 | 6.603  | -2.168  | 2.124  | 1.00 | 0.00 | O   |
| ATOM | 319 | CB   | THR | 21 | 6.340  | -4.521  | 3.996  | 1.00 | 0.00 | C   |
| ATOM | 320 | CG2  | THR | 21 | 6.570  | -3.839  | 5.342  | 1.00 | 0.00 | C   |
| ATOM | 321 | OG1  | THR | 21 | 5.989  | -5.875  | 4.209  | 1.00 | 0.00 | O   |
| ATOM | 322 | H    | THR | 21 | 5.820  | -4.778  | 1.407  | 1.00 | 0.00 | H   |
| ATOM | 323 | HA   | THR | 21 | 4.317  | -3.779  | 3.784  | 1.00 | 0.00 | H   |

|      |     |      |     |    |        |        |        |      |      |     |
|------|-----|------|-----|----|--------|--------|--------|------|------|-----|
| ATOM | 324 | HB   | THR | 21 | 7.278  | -4.508 | 3.459  | 1.00 | 0.00 | H   |
| ATOM | 325 | HG21 | THR | 21 | 7.349  | -4.353 | 5.903  | 1.00 | 0.00 | H   |
| ATOM | 326 | HG22 | THR | 21 | 6.881  | -2.798 | 5.175  | 1.00 | 0.00 | H   |
| ATOM | 327 | HG23 | THR | 21 | 5.646  | -3.837 | 5.925  | 1.00 | 0.00 | H   |
| ATOM | 328 | HG1  | THR | 21 | 5.937  | -6.295 | 3.360  | 1.00 | 0.00 | H   |
| ATOM | 329 | N    | ILE | 22 | 4.913  | -1.434 | 3.451  | 1.00 | 0.00 | N   |
| ATOM | 330 | CA   | ILE | 22 | 5.096  | -0.017 | 3.251  | 1.00 | 0.00 | C   |
| ATOM | 331 | C    | ILE | 22 | 5.188  | 0.655  | 4.597  | 1.00 | 0.00 | C   |
| ATOM | 332 | O    | ILE | 22 | 4.267  | 0.522  | 5.401  | 1.00 | 0.00 | O   |
| ATOM | 333 | CB   | ILE | 22 | 3.960  | 0.600  | 2.395  | 1.00 | 0.00 | C   |
| ATOM | 334 | CG2  | ILE | 22 | 4.258  | 2.086  | 2.083  | 1.00 | 0.00 | C   |
| ATOM | 335 | CG1  | ILE | 22 | 3.715  | -0.195 | 1.119  | 1.00 | 0.00 | C   |
| ATOM | 336 | CD1  | ILE | 22 | 2.547  | 0.333  | 0.293  | 1.00 | 0.00 | C   |
| ATOM | 337 | H    | ILE | 22 | 4.153  | -1.691 | 4.073  | 1.00 | 0.00 | H   |
| ATOM | 338 | HA   | ILE | 22 | 6.057  | 0.126  | 2.783  | 1.00 | 0.00 | H   |
| ATOM | 339 | HB   | ILE | 22 | 3.015  | 0.514  | 2.937  | 1.00 | 0.00 | H   |
| ATOM | 340 | HG21 | ILE | 22 | 3.451  | 2.514  | 1.480  | 1.00 | 0.00 | H   |
| ATOM | 341 | HG22 | ILE | 22 | 4.356  | 2.684  | 3.002  | 1.00 | 0.00 | H   |
| ATOM | 342 | HG23 | ILE | 22 | 5.197  | 2.174  | 1.519  | 1.00 | 0.00 | H   |
| ATOM | 343 | HG12 | ILE | 22 | 4.621  | -0.169 | 0.523  | 1.00 | 0.00 | H   |
| ATOM | 344 | HG13 | ILE | 22 | 3.501  | -1.226 | 1.415  | 1.00 | 0.00 | H   |
| ATOM | 345 | HD11 | ILE | 22 | 2.421  | -0.284 | -0.598 | 1.00 | 0.00 | H   |
| ATOM | 346 | HD12 | ILE | 22 | 1.623  | 0.310  | 0.878  | 1.00 | 0.00 | H   |
| ATOM | 347 | HD13 | ILE | 22 | 2.742  | 1.367  | -0.015 | 1.00 | 0.00 | H   |
| ATOM | 348 | N    | HIS | 23 | 6.245  | 1.455  | 4.766  | 1.00 | 0.00 | N   |
| ATOM | 349 | CA   | HIS | 23 | 6.304  | 2.495  | 5.768  | 1.00 | 0.00 | C   |
| ATOM | 350 | C    | HIS | 23 | 5.489  | 3.686  | 5.205  | 1.00 | 0.00 | C   |
| ATOM | 351 | O    | HIS | 23 | 6.021  | 4.463  | 4.416  | 1.00 | 0.00 | O   |
| ATOM | 352 | CB   | HIS | 23 | 7.795  | 2.765  | 6.135  | 1.00 | 0.00 | C   |
| ATOM | 353 | CG   | HIS | 23 | 8.016  | 3.636  | 7.328  | 1.00 | 0.00 | C   |
| ATOM | 354 | ND1  | HIS | 23 | 9.158  | 3.551  | 8.139  | 1.00 | 0.00 | N   |
| ATOM | 355 | CE1  | HIS | 23 | 9.010  | 4.512  | 9.048  | 1.00 | 0.00 | C   |
| ATOM | 356 | NE2  | HIS | 23 | 7.866  | 5.188  | 8.877  | 1.00 | 0.00 | N   |
| ATOM | 357 | CD2  | HIS | 23 | 7.204  | 4.631  | 7.784  | 1.00 | 0.00 | C   |
| ATOM | 358 | H    | HIS | 23 | 6.878  | 1.566  | 3.977  | 1.00 | 0.00 | H   |
| ATOM | 359 | HA   | HIS | 23 | 5.812  | 2.164  | 6.651  | 1.00 | 0.00 | H   |
| ATOM | 360 | HB2  | HIS | 23 | 8.301  | 1.836  | 6.431  | 1.00 | 0.00 | H   |
| ATOM | 361 | HB3  | HIS | 23 | 8.349  | 3.227  | 5.322  | 1.00 | 0.00 | H   |
| ATOM | 362 | HE1  | HIS | 23 | 9.751  | 4.722  | 9.828  | 1.00 | 0.00 | H   |
| ATOM | 363 | HE2  | HIS | 23 | 7.614  | 6.025  | 9.418  | 1.00 | 0.00 | H   |
| ATOM | 364 | HD2  | HIS | 23 | 6.265  | 4.914  | 7.315  | 1.00 | 0.00 | H   |
| ATOM | 365 | N    | HIS | 24 | 4.186  | 3.767  | 5.571  | 1.00 | 0.00 | N   |
| ATOM | 366 | CA   | HIS | 24 | 3.200  | 4.813  | 5.259  | 1.00 | 0.00 | C   |
| ATOM | 367 | C    | HIS | 24 | 3.529  | 6.157  | 5.992  | 1.00 | 0.00 | C   |
| ATOM | 368 | O    | HIS | 24 | 3.729  | 6.089  | 7.197  | 1.00 | 0.00 | O   |
| ATOM | 369 | CB   | HIS | 24 | 1.714  | 4.388  | 5.162  | 1.00 | 0.00 | C   |
| ATOM | 370 | CG   | HIS | 24 | 0.977  | 4.360  | 6.420  | 1.00 | 0.00 | C   |
| ATOM | 371 | ND1  | HIS | 24 | 0.516  | 5.480  | 7.056  | 1.00 | 0.00 | N   |
| ATOM | 372 | CE1  | HIS | 24 | -0.340 | 5.107  | 8.023  | 1.00 | 0.00 | C   |
| ATOM | 373 | NE2  | HIS | 24 | -0.519 | 3.796  | 8.017  | 1.00 | 0.00 | N   |
| ATOM | 374 | CD2  | HIS | 24 | 0.307  | 3.326  | 7.018  | 1.00 | 0.00 | C   |
| ATOM | 375 | H    | HIS | 24 | 3.902  | 3.079  | 6.263  | 1.00 | 0.00 | H   |
| ATOM | 376 | HA   | HIS | 24 | 3.474  | 5.040  | 4.228  | 1.00 | 0.00 | H   |
| ATOM | 377 | HB2  | HIS | 24 | 1.234  | 5.053  | 4.429  | 1.00 | 0.00 | H   |
| ATOM | 378 | HB3  | HIS | 24 | 1.734  | 3.385  | 4.721  | 1.00 | 0.00 | H   |
| ATOM | 379 | HD1  | HIS | 24 | 0.801  | 6.443  | 6.857  | 1.00 | 0.00 | H   |
| ATOM | 380 | HE1  | HIS | 24 | -0.804 | 5.830  | 8.673  | 1.00 | 0.00 | H   |
| ATOM | 381 | HD2  | HIS | 24 | 0.386  | 2.269  | 6.792  | 1.00 | 0.00 | H   |
| ATOM | 382 | N    | ASP | 25 | 3.538  | 7.330  | 5.319  | 1.00 | 0.00 | N   |
| ATOM | 383 | CA   | ASP | 25 | 3.489  | 8.712  | 5.907  | 1.00 | 0.00 | C   |
| ATOM | 384 | C    | ASP | 25 | 2.123  | 8.906  | 6.593  | 1.00 | 0.00 | C   |
| ATOM | 385 | O    | ASP | 25 | 1.213  | 8.113  | 6.314  | 1.00 | 0.00 | O   |
| ATOM | 386 | CB   | ASP | 25 | 3.612  | 9.841  | 4.837  | 1.00 | 0.00 | C   |
| ATOM | 387 | CG   | ASP | 25 | 4.902  | 9.829  | 4.020  | 1.00 | 0.00 | C   |
| ATOM | 388 | OD1  | ASP | 25 | 5.934  | 10.267 | 4.563  | 1.00 | 0.00 | O   |
| ATOM | 389 | OD2  | ASP | 25 | 4.838  | 9.435  | 2.828  | 1.00 | 0.00 | O1- |

|      |     |      |     |    |         |        |        |      |      |   |
|------|-----|------|-----|----|---------|--------|--------|------|------|---|
| ATOM | 390 | H    | ASP | 25 | 3.419   | 7.286  | 4.309  | 1.00 | 0.00 | H |
| ATOM | 391 | HA   | ASP | 25 | 4.274   | 8.877  | 6.652  | 1.00 | 0.00 | H |
| ATOM | 392 | HB2  | ASP | 25 | 2.848   | 9.692  | 4.081  | 1.00 | 0.00 | H |
| ATOM | 393 | HB3  | ASP | 25 | 3.430   | 10.843 | 5.307  | 1.00 | 0.00 | H |
| ATOM | 394 | N    | PRO | 26 | 1.930   | 9.892  | 7.504  | 1.00 | 0.00 | N |
| ATOM | 395 | CA   | PRO | 26 | 0.667   | 10.022 | 8.246  | 1.00 | 0.00 | C |
| ATOM | 396 | C    | PRO | 26 | -0.526  | 10.250 | 7.320  | 1.00 | 0.00 | C |
| ATOM | 397 | O    | PRO | 26 | -0.454  | 11.056 | 6.387  | 1.00 | 0.00 | O |
| ATOM | 398 | CD   | PRO | 26 | 2.908   | 10.869 | 8.011  | 1.00 | 0.00 | C |
| ATOM | 399 | CG   | PRO | 26 | 2.323   | 11.323 | 9.343  | 1.00 | 0.00 | C |
| ATOM | 400 | CB   | PRO | 26 | 0.841   | 11.286 | 9.086  | 1.00 | 0.00 | C |
| ATOM | 401 | HD3  | PRO | 26 | 3.910   | 10.492 | 8.158  | 1.00 | 0.00 | H |
| ATOM | 402 | HD2  | PRO | 26 | 2.953   | 11.750 | 7.340  | 1.00 | 0.00 | H |
| ATOM | 403 | HG3  | PRO | 26 | 2.596   | 10.594 | 10.127 | 1.00 | 0.00 | H |
| ATOM | 404 | HG2  | PRO | 26 | 2.656   | 12.307 | 9.647  | 1.00 | 0.00 | H |
| ATOM | 405 | HB3  | PRO | 26 | 0.267   | 11.246 | 10.003 | 1.00 | 0.00 | H |
| ATOM | 406 | HB2  | PRO | 26 | 0.545   | 12.180 | 8.514  | 1.00 | 0.00 | H |
| ATOM | 407 | HA   | PRO | 26 | 0.511   | 9.116  | 8.849  | 1.00 | 0.00 | H |
| ATOM | 408 | N    | ILE | 27 | -1.611  | 9.538  | 7.609  | 1.00 | 0.00 | N |
| ATOM | 409 | CA   | ILE | 27 | -2.831  | 9.545  | 6.853  | 1.00 | 0.00 | C |
| ATOM | 410 | C    | ILE | 27 | -3.886  | 10.257 | 7.689  | 1.00 | 0.00 | C |
| ATOM | 411 | O    | ILE | 27 | -4.338  | 9.736  | 8.709  | 1.00 | 0.00 | O |
| ATOM | 412 | CB   | ILE | 27 | -3.261  | 8.107  | 6.471  | 1.00 | 0.00 | C |
| ATOM | 413 | CG2  | ILE | 27 | -4.430  | 8.205  | 5.492  | 1.00 | 0.00 | C |
| ATOM | 414 | CG1  | ILE | 27 | -2.119  | 7.298  | 5.838  | 1.00 | 0.00 | C |
| ATOM | 415 | CD1  | ILE | 27 | -2.471  | 5.859  | 5.486  | 1.00 | 0.00 | C |
| ATOM | 416 | H    | ILE | 27 | -1.629  | 9.049  | 8.500  | 1.00 | 0.00 | H |
| ATOM | 417 | HA   | ILE | 27 | -2.653  | 10.123 | 5.966  | 1.00 | 0.00 | H |
| ATOM | 418 | HB   | ILE | 27 | -3.575  | 7.561  | 7.362  | 1.00 | 0.00 | H |
| ATOM | 419 | HG21 | ILE | 27 | -4.766  | 7.209  | 5.207  | 1.00 | 0.00 | H |
| ATOM | 420 | HG22 | ILE | 27 | -5.260  | 8.748  | 5.952  | 1.00 | 0.00 | H |
| ATOM | 421 | HG23 | ILE | 27 | -4.109  | 8.745  | 4.594  | 1.00 | 0.00 | H |
| ATOM | 422 | HG12 | ILE | 27 | -1.800  | 7.787  | 4.922  | 1.00 | 0.00 | H |
| ATOM | 423 | HG13 | ILE | 27 | -1.289  | 7.263  | 6.544  | 1.00 | 0.00 | H |
| ATOM | 424 | HD11 | ILE | 27 | -1.594  | 5.367  | 5.051  | 1.00 | 0.00 | H |
| ATOM | 425 | HD12 | ILE | 27 | -2.773  | 5.317  | 6.383  | 1.00 | 0.00 | H |
| ATOM | 426 | HD13 | ILE | 27 | -3.284  | 5.841  | 4.761  | 1.00 | 0.00 | H |
| ATOM | 427 | N    | ALA | 28 | -4.294  | 11.442 | 7.230  | 1.00 | 0.00 | N |
| ATOM | 428 | CA   | ALA | 28 | -5.219  | 12.307 | 7.935  | 1.00 | 0.00 | C |
| ATOM | 429 | C    | ALA | 28 | -6.671  | 11.859 | 7.835  | 1.00 | 0.00 | C |
| ATOM | 430 | O    | ALA | 28 | -7.424  | 12.053 | 8.787  | 1.00 | 0.00 | O |
| ATOM | 431 | CB   | ALA | 28 | -5.099  | 13.725 | 7.378  | 1.00 | 0.00 | C |
| ATOM | 432 | H    | ALA | 28 | -3.909  | 11.779 | 6.357  | 1.00 | 0.00 | H |
| ATOM | 433 | HA   | ALA | 28 | -4.995  | 12.256 | 8.987  | 1.00 | 0.00 | H |
| ATOM | 434 | HB1  | ALA | 28 | -5.825  | 14.360 | 7.892  | 1.00 | 0.00 | H |
| ATOM | 435 | HB2  | ALA | 28 | -4.096  | 14.145 | 7.532  | 1.00 | 0.00 | H |
| ATOM | 436 | HB3  | ALA | 28 | -5.318  | 13.733 | 6.306  | 1.00 | 0.00 | H |
| ATOM | 437 | N    | ALA | 29 | -7.055  | 11.180 | 6.750  | 1.00 | 0.00 | N |
| ATOM | 438 | CA   | ALA | 29 | -8.418  | 10.698 | 6.550  | 1.00 | 0.00 | C |
| ATOM | 439 | C    | ALA | 29 | -8.836  | 9.587  | 7.530  | 1.00 | 0.00 | C |
| ATOM | 440 | O    | ALA | 29 | -10.017 | 9.252  | 7.579  | 1.00 | 0.00 | O |
| ATOM | 441 | CB   | ALA | 29 | -8.524  | 10.093 | 5.151  | 1.00 | 0.00 | C |
| ATOM | 442 | H    | ALA | 29 | -6.388  | 11.094 | 5.981  | 1.00 | 0.00 | H |
| ATOM | 443 | HA   | ALA | 29 | -9.098  | 11.556 | 6.670  | 1.00 | 0.00 | H |
| ATOM | 444 | HB1  | ALA | 29 | -9.543  | 9.721  | 5.006  | 1.00 | 0.00 | H |
| ATOM | 445 | HB2  | ALA | 29 | -8.298  | 10.821 | 4.370  | 1.00 | 0.00 | H |
| ATOM | 446 | HB3  | ALA | 29 | -7.828  | 9.250  | 5.062  | 1.00 | 0.00 | H |
| ATOM | 447 | N    | VAL | 30 | -7.896  | 9.031  | 8.311  | 1.00 | 0.00 | N |
| ATOM | 448 | CA   | VAL | 30 | -8.119  | 7.963  | 9.289  | 1.00 | 0.00 | C |
| ATOM | 449 | C    | VAL | 30 | -7.345  | 8.180  | 10.585 | 1.00 | 0.00 | C |
| ATOM | 450 | O    | VAL | 30 | -7.333  | 7.332  | 11.475 | 1.00 | 0.00 | O |
| ATOM | 451 | CB   | VAL | 30 | -7.891  | 6.562  | 8.637  | 1.00 | 0.00 | C |
| ATOM | 452 | CG1  | VAL | 30 | -8.939  | 6.166  | 7.568  | 1.00 | 0.00 | C |
| ATOM | 453 | CG2  | VAL | 30 | -6.503  | 6.403  | 8.022  | 1.00 | 0.00 | C |
| ATOM | 454 | H    | VAL | 30 | -6.944  | 9.314  | 8.114  | 1.00 | 0.00 | H |
| ATOM | 455 | HA   | VAL | 30 | -9.178  | 8.098  | 9.534  | 1.00 | 0.00 | H |

|      |     |          |    |        |        |        |      |      |     |
|------|-----|----------|----|--------|--------|--------|------|------|-----|
| ATOM | 456 | HB VAL   | 30 | -7.899 | 5.815  | 9.428  | 1.00 | 0.00 | H   |
| ATOM | 457 | HG11 VAL | 30 | -8.757 | 5.149  | 7.169  | 1.00 | 0.00 | H   |
| ATOM | 458 | HG12 VAL | 30 | -9.948 | 6.185  | 7.991  | 1.00 | 0.00 | H   |
| ATOM | 459 | HG13 VAL | 30 | -8.907 | 6.863  | 6.717  | 1.00 | 0.00 | H   |
| ATOM | 460 | HG21 VAL | 30 | -6.349 | 5.379  | 7.646  | 1.00 | 0.00 | H   |
| ATOM | 461 | HG22 VAL | 30 | -6.375 | 7.101  | 7.196  | 1.00 | 0.00 | H   |
| ATOM | 462 | HG23 VAL | 30 | -5.760 | 6.607  | 8.791  | 1.00 | 0.00 | H   |
| ATOM | 463 | N ASN    | 31 | -6.674 | 9.350  | 10.638 | 1.00 | 0.00 | N   |
| ATOM | 464 | CA ASN   | 31 | -5.987 | 9.690  | 11.852 | 1.00 | 0.00 | C   |
| ATOM | 465 | C ASN    | 31 | -4.944 | 8.563  | 12.204 | 1.00 | 0.00 | C   |
| ATOM | 466 | O ASN    | 31 | -4.781 | 8.201  | 13.354 | 1.00 | 0.00 | O   |
| ATOM | 467 | CB ASN   | 31 | -7.016 | 9.928  | 12.987 | 1.00 | 0.00 | C   |
| ATOM | 468 | CG ASN   | 31 | -6.381 | 10.838 | 14.028 | 1.00 | 0.00 | C   |
| ATOM | 469 | OD1 ASN  | 31 | -6.264 | 12.036 | 13.806 | 1.00 | 0.00 | O   |
| ATOM | 470 | ND2 ASN  | 31 | -5.947 | 10.226 | 15.153 | 1.00 | 0.00 | N   |
| ATOM | 471 | H ASN    | 31 | -6.907 | 10.070 | 9.966  | 1.00 | 0.00 | H   |
| ATOM | 472 | HA ASN   | 31 | -5.450 | 10.625 | 11.618 | 1.00 | 0.00 | H   |
| ATOM | 473 | HB2 ASN  | 31 | -7.950 | 10.418 | 12.594 | 1.00 | 0.00 | H   |
| ATOM | 474 | HB3 ASN  | 31 | -7.320 | 8.954  | 13.385 | 1.00 | 0.00 | H   |
| ATOM | 475 | HD22 ASN | 31 | -5.326 | 10.743 | 15.765 | 1.00 | 0.00 | H   |
| ATOM | 476 | HD21 ASN | 31 | -5.770 | 9.233  | 15.094 | 1.00 | 0.00 | H   |
| ATOM | 477 | N MET    | 32 | -4.257 | 8.021  | 11.141 | 1.00 | 0.00 | N   |
| ATOM | 478 | CA MET   | 32 | -3.113 | 7.111  | 11.328 | 1.00 | 0.00 | C   |
| ATOM | 479 | C MET    | 32 | -1.806 | 7.978  | 11.285 | 1.00 | 0.00 | C   |
| ATOM | 480 | O MET    | 32 | -1.653 | 8.696  | 10.309 | 1.00 | 0.00 | O   |
| ATOM | 481 | CB MET   | 32 | -3.049 | 5.986  | 10.262 | 1.00 | 0.00 | C   |
| ATOM | 482 | CG MET   | 32 | -4.135 | 4.916  | 10.398 | 1.00 | 0.00 | C   |
| ATOM | 483 | SD MET   | 32 | -4.071 | 3.800  | 8.938  | 1.00 | 0.00 | S   |
| ATOM | 484 | CE MET   | 32 | -5.368 | 2.606  | 9.381  | 1.00 | 0.00 | C   |
| ATOM | 485 | H MET    | 32 | -4.258 | 8.554  | 10.270 | 1.00 | 0.00 | H   |
| ATOM | 486 | HA MET   | 32 | -3.287 | 6.576  | 12.260 | 1.00 | 0.00 | H   |
| ATOM | 487 | HB2 MET  | 32 | -3.084 | 6.408  | 9.250  | 1.00 | 0.00 | H   |
| ATOM | 488 | HB3 MET  | 32 | -2.077 | 5.460  | 10.338 | 1.00 | 0.00 | H   |
| ATOM | 489 | HG2 MET  | 32 | -3.979 | 4.275  | 11.269 | 1.00 | 0.00 | H   |
| ATOM | 490 | HG3 MET  | 32 | -5.144 | 5.333  | 10.485 | 1.00 | 0.00 | H   |
| ATOM | 491 | HE1 MET  | 32 | -5.431 | 1.862  | 8.578  | 1.00 | 0.00 | H   |
| ATOM | 492 | HE2 MET  | 32 | -5.126 | 2.110  | 10.325 | 1.00 | 0.00 | H   |
| ATOM | 493 | HE3 MET  | 32 | -6.347 | 3.095  | 9.443  | 1.00 | 0.00 | H   |
| ATOM | 494 | N PRO    | 33 | -0.926 | 7.955  | 12.315 | 1.00 | 0.00 | N   |
| ATOM | 495 | CA PRO   | 33 | 0.438  | 8.504  | 12.251 | 1.00 | 0.00 | C   |
| ATOM | 496 | C PRO    | 33 | 1.217  | 7.658  | 11.215 | 1.00 | 0.00 | C   |
| ATOM | 497 | O PRO    | 33 | 0.667  | 6.754  | 10.588 | 1.00 | 0.00 | O   |
| ATOM | 498 | CD PRO   | 33 | -1.056 | 7.035  | 13.432 | 1.00 | 0.00 | C   |
| ATOM | 499 | CG PRO   | 33 | 0.306  | 6.975  | 14.081 | 1.00 | 0.00 | C   |
| ATOM | 500 | CB PRO   | 33 | 1.006  | 8.245  | 13.659 | 1.00 | 0.00 | C   |
| ATOM | 501 | HD3 PRO  | 33 | -1.803 | 7.440  | 14.098 | 1.00 | 0.00 | H   |
| ATOM | 502 | HD2 PRO  | 33 | -1.360 | 6.061  | 13.064 | 1.00 | 0.00 | H   |
| ATOM | 503 | HG3 PRO  | 33 | 0.215  | 6.939  | 15.158 | 1.00 | 0.00 | H   |
| ATOM | 504 | HG2 PRO  | 33 | 0.866  | 6.114  | 13.721 | 1.00 | 0.00 | H   |
| ATOM | 505 | HB3 PRO  | 33 | 0.757  | 9.053  | 14.357 | 1.00 | 0.00 | H   |
| ATOM | 506 | HB2 PRO  | 33 | 2.096  | 8.097  | 13.679 | 1.00 | 0.00 | H   |
| ATOM | 507 | HA PRO   | 33 | 0.426  | 9.591  | 12.073 | 1.00 | 0.00 | H   |
| ATOM | 508 | N GLU    | 34 | 2.537  | 7.899  | 11.094 | 1.00 | 0.00 | N   |
| ATOM | 509 | CA GLU   | 34 | 3.383  | 7.018  | 10.291 | 1.00 | 0.00 | C   |
| ATOM | 510 | C GLU    | 34 | 3.222  | 5.554  | 10.910 | 1.00 | 0.00 | C   |
| ATOM | 511 | O GLU    | 34 | 3.290  | 5.387  | 12.117 | 1.00 | 0.00 | O   |
| ATOM | 512 | CB GLU   | 34 | 4.790  | 7.669  | 10.157 | 1.00 | 0.00 | C   |
| ATOM | 513 | CG GLU   | 34 | 5.621  | 7.724  | 11.412 | 1.00 | 0.00 | C   |
| ATOM | 514 | CD GLU   | 34 | 7.015  | 8.307  | 11.088 | 1.00 | 0.00 | C   |
| ATOM | 515 | OE1 GLU  | 34 | 7.175  | 9.513  | 11.396 | 1.00 | 0.00 | O   |
| ATOM | 516 | OE2 GLU  | 34 | 7.813  | 7.533  | 10.520 | 1.00 | 0.00 | O1- |
| ATOM | 517 | H GLU    | 34 | 2.998  | 8.580  | 11.685 | 1.00 | 0.00 | H   |
| ATOM | 518 | HA GLU   | 34 | 2.931  | 6.975  | 9.308  | 1.00 | 0.00 | H   |
| ATOM | 519 | HB2 GLU  | 34 | 5.380  | 7.106  | 9.437  | 1.00 | 0.00 | H   |
| ATOM | 520 | HB3 GLU  | 34 | 4.766  | 8.739  | 9.791  | 1.00 | 0.00 | H   |
| ATOM | 521 | HG2 GLU  | 34 | 5.158  | 8.393  | 12.123 | 1.00 | 0.00 | H   |

|      |     |          |    |        |         |        |      |      |     |
|------|-----|----------|----|--------|---------|--------|------|------|-----|
| ATOM | 522 | HG3 GLU  | 34 | 5.687  | 6.720   | 11.824 | 1.00 | 0.00 | H   |
| ATOM | 523 | N MET    | 35 | 2.878  | 4.528   | 10.048 | 1.00 | 0.00 | N   |
| ATOM | 524 | CA MET   | 35 | 2.664  | 3.105   | 10.408 | 1.00 | 0.00 | C   |
| ATOM | 525 | C MET    | 35 | 3.337  | 2.244   | 9.308  | 1.00 | 0.00 | C   |
| ATOM | 526 | O MET    | 35 | 3.072  | 2.467   | 8.134  | 1.00 | 0.00 | O   |
| ATOM | 527 | CB MET   | 35 | 1.185  | 2.607   | 10.494 | 1.00 | 0.00 | C   |
| ATOM | 528 | CG MET   | 35 | 0.301  | 3.294   | 11.526 | 1.00 | 0.00 | C   |
| ATOM | 529 | SD MET   | 35 | -1.309 | 2.404   | 11.489 | 1.00 | 0.00 | S   |
| ATOM | 530 | CE MET   | 35 | -2.219 | 3.142   | 12.878 | 1.00 | 0.00 | C   |
| ATOM | 531 | H MET    | 35 | 2.859  | 4.729   | 9.053  | 1.00 | 0.00 | H   |
| ATOM | 532 | HA MET   | 35 | 3.066  | 2.915   | 11.405 | 1.00 | 0.00 | H   |
| ATOM | 533 | HB2 MET  | 35 | 0.696  | 2.710   | 9.519  | 1.00 | 0.00 | H   |
| ATOM | 534 | HB3 MET  | 35 | 1.170  | 1.518   | 10.736 | 1.00 | 0.00 | H   |
| ATOM | 535 | HG2 MET  | 35 | 0.693  | 3.217   | 12.545 | 1.00 | 0.00 | H   |
| ATOM | 536 | HG3 MET  | 35 | 0.137  | 4.348   | 11.288 | 1.00 | 0.00 | H   |
| ATOM | 537 | HE1 MET  | 35 | -3.145 | 2.572   | 13.018 | 1.00 | 0.00 | H   |
| ATOM | 538 | HE2 MET  | 35 | -1.626 | 3.063   | 13.795 | 1.00 | 0.00 | H   |
| ATOM | 539 | HE3 MET  | 35 | -2.485 | 4.186   | 12.700 | 1.00 | 0.00 | H   |
| ATOM | 540 | N THR    | 36 | 4.171  | 1.225   | 9.676  | 1.00 | 0.00 | N   |
| ATOM | 541 | CA THR   | 36 | 4.607  | 0.187   | 8.718  | 1.00 | 0.00 | C   |
| ATOM | 542 | C THR    | 36 | 3.456  | -0.870  | 8.694  | 1.00 | 0.00 | C   |
| ATOM | 543 | O THR    | 36 | 3.311  | -1.603  | 9.663  | 1.00 | 0.00 | O   |
| ATOM | 544 | CB THR   | 36 | 6.014  | -0.392  | 9.100  | 1.00 | 0.00 | C   |
| ATOM | 545 | CG2 THR  | 36 | 6.443  | -1.444  | 8.105  | 1.00 | 0.00 | C   |
| ATOM | 546 | OG1 THR  | 36 | 6.971  | 0.633   | 8.996  | 1.00 | 0.00 | O   |
| ATOM | 547 | H THR    | 36 | 4.270  | 1.016   | 10.661 | 1.00 | 0.00 | H   |
| ATOM | 548 | HA THR   | 36 | 4.811  | 0.699   | 7.757  | 1.00 | 0.00 | H   |
| ATOM | 549 | HB THR   | 36 | 6.033  | -0.882  | 10.095 | 1.00 | 0.00 | H   |
| ATOM | 550 | HG21 THR | 36 | 7.407  | -1.920  | 8.365  | 1.00 | 0.00 | H   |
| ATOM | 551 | HG22 THR | 36 | 5.675  | -2.208  | 8.073  | 1.00 | 0.00 | H   |
| ATOM | 552 | HG23 THR | 36 | 6.548  | -0.987  | 7.116  | 1.00 | 0.00 | H   |
| ATOM | 553 | HG1 THR  | 36 | 6.903  | 1.256   | 9.742  | 1.00 | 0.00 | H   |
| ATOM | 554 | N MET    | 37 | 2.575  | -0.870  | 7.645  | 1.00 | 0.00 | N   |
| ATOM | 555 | CA MET   | 37 | 1.491  | -1.859  | 7.473  | 1.00 | 0.00 | C   |
| ATOM | 556 | C MET    | 37 | 1.874  | -2.708  | 6.217  | 1.00 | 0.00 | C   |
| ATOM | 557 | O MET    | 37 | 2.489  | -2.168  | 5.320  | 1.00 | 0.00 | O   |
| ATOM | 558 | CB MET   | 37 | 0.070  | -1.219  | 7.397  | 1.00 | 0.00 | C   |
| ATOM | 559 | CG MET   | 37 | -0.196 | -0.130  | 8.438  | 1.00 | 0.00 | C   |
| ATOM | 560 | SD MET   | 37 | -1.913 | 0.516   | 8.295  | 1.00 | 0.00 | S   |
| ATOM | 561 | CE MET   | 37 | -2.788 | -0.600  | 9.425  | 1.00 | 0.00 | C   |
| ATOM | 562 | H MET    | 37 | 2.859  | -0.375  | 6.802  | 1.00 | 0.00 | H   |
| ATOM | 563 | HA MET   | 37 | 1.425  | -2.496  | 8.356  | 1.00 | 0.00 | H   |
| ATOM | 564 | HB2 MET  | 37 | -0.128 | -0.800  | 6.411  | 1.00 | 0.00 | H   |
| ATOM | 565 | HB3 MET  | 37 | -0.704 | -1.997  | 7.538  | 1.00 | 0.00 | H   |
| ATOM | 566 | HG2 MET  | 37 | -0.059 | -0.467  | 9.473  | 1.00 | 0.00 | H   |
| ATOM | 567 | HG3 MET  | 37 | 0.439  | 0.750   | 8.299  | 1.00 | 0.00 | H   |
| ATOM | 568 | HE1 MET  | 37 | -3.852 | -0.342  | 9.404  | 1.00 | 0.00 | H   |
| ATOM | 569 | HE2 MET  | 37 | -2.683 | -1.629  | 9.073  | 1.00 | 0.00 | H   |
| ATOM | 570 | HE3 MET  | 37 | -2.418 | -0.509  | 10.452 | 1.00 | 0.00 | H   |
| ATOM | 571 | N ARG    | 38 | 1.574  | -4.040  | 6.238  | 1.00 | 0.00 | N   |
| ATOM | 572 | CA ARG   | 38 | 1.560  | -4.731  | 4.973  | 1.00 | 0.00 | C   |
| ATOM | 573 | C ARG    | 38 | 0.232  | -4.480  | 4.243  | 1.00 | 0.00 | C   |
| ATOM | 574 | O ARG    | 38 | -0.824 | -4.573  | 4.862  | 1.00 | 0.00 | O   |
| ATOM | 575 | CB ARG   | 38 | 1.694  | -6.261  | 5.144  | 1.00 | 0.00 | C   |
| ATOM | 576 | CG ARG   | 38 | 3.007  | -6.725  | 5.769  | 1.00 | 0.00 | C   |
| ATOM | 577 | CD ARG   | 38 | 3.381  | -8.173  | 5.427  | 1.00 | 0.00 | C   |
| ATOM | 578 | NE ARG   | 38 | 2.425  | -9.145  | 5.984  | 1.00 | 0.00 | N   |
| ATOM | 579 | CZ ARG   | 38 | 2.502  | -10.479 | 5.871  | 1.00 | 0.00 | C   |
| ATOM | 580 | NH1 ARG  | 38 | 3.465  | -11.065 | 5.163  | 1.00 | 0.00 | N   |
| ATOM | 581 | NH2 ARG  | 38 | 1.592  | -11.229 | 6.483  | 1.00 | 0.00 | N1+ |
| ATOM | 582 | H ARG    | 38 | 0.942  | -4.416  | 6.953  | 1.00 | 0.00 | H   |
| ATOM | 583 | HA ARG   | 38 | 2.337  | -4.419  | 4.259  | 1.00 | 0.00 | H   |
| ATOM | 584 | HB2 ARG  | 38 | 0.874  | -6.621  | 5.776  | 1.00 | 0.00 | H   |
| ATOM | 585 | HB3 ARG  | 38 | 1.629  | -6.777  | 4.172  | 1.00 | 0.00 | H   |
| ATOM | 586 | HG2 ARG  | 38 | 3.809  | -6.068  | 5.423  | 1.00 | 0.00 | H   |
| ATOM | 587 | HG3 ARG  | 38 | 2.907  | -6.644  | 6.845  | 1.00 | 0.00 | H   |

|      |     |          |    |        |         |        |      |      |   |
|------|-----|----------|----|--------|---------|--------|------|------|---|
| ATOM | 588 | HD2 ARG  | 38 | 3.500  | -8.264  | 4.339  | 1.00 | 0.00 | H |
| ATOM | 589 | HD3 ARG  | 38 | 4.325  | -8.418  | 5.909  | 1.00 | 0.00 | H |
| ATOM | 590 | HE ARG   | 38 | 1.719  | -8.745  | 6.622  | 1.00 | 0.00 | H |
| ATOM | 591 | HH12 ARG | 38 | 3.493  | -12.097 | 5.037  | 1.00 | 0.00 | H |
| ATOM | 592 | HH11 ARG | 38 | 4.281  | -10.569 | 4.836  | 1.00 | 0.00 | H |
| ATOM | 593 | HH22 ARG | 38 | 1.560  | -12.254 | 6.401  | 1.00 | 0.00 | H |
| ATOM | 594 | HH21 ARG | 38 | 1.228  | -10.904 | 7.384  | 1.00 | 0.00 | H |
| ATOM | 595 | N PHE    | 39 | 0.326  | -4.240  | 2.938  | 1.00 | 0.00 | N |
| ATOM | 596 | CA PHE   | 39 | -0.783 | -3.980  | 2.044  | 1.00 | 0.00 | C |
| ATOM | 597 | C PHE    | 39 | -0.910 | -5.106  | 1.043  | 1.00 | 0.00 | C |
| ATOM | 598 | O PHE    | 39 | 0.083  | -5.579  | 0.492  | 1.00 | 0.00 | O |
| ATOM | 599 | CB PHE   | 39 | -0.621 | -2.611  | 1.362  | 1.00 | 0.00 | C |
| ATOM | 600 | CG PHE   | 39 | -0.669 | -1.450  | 2.323  | 1.00 | 0.00 | C |
| ATOM | 601 | CD1 PHE  | 39 | 0.501  | -1.010  | 2.960  | 1.00 | 0.00 | C |
| ATOM | 602 | CE1 PHE  | 39 | 0.455  | 0.054   | 3.870  | 1.00 | 0.00 | C |
| ATOM | 603 | CZ PHE   | 39 | -0.768 | 0.674   | 4.160  | 1.00 | 0.00 | C |
| ATOM | 604 | CE2 PHE  | 39 | -1.939 | 0.236   | 3.526  | 1.00 | 0.00 | C |
| ATOM | 605 | CD2 PHE  | 39 | -1.887 | -0.821  | 2.608  | 1.00 | 0.00 | C |
| ATOM | 606 | H PHE    | 39 | 1.252  | -4.197  | 2.507  | 1.00 | 0.00 | H |
| ATOM | 607 | HA PHE   | 39 | -1.691 | -4.057  | 2.606  | 1.00 | 0.00 | H |
| ATOM | 608 | HB2 PHE  | 39 | 0.339  | -2.556  | 0.840  | 1.00 | 0.00 | H |
| ATOM | 609 | HB3 PHE  | 39 | -1.425 | -2.455  | 0.631  | 1.00 | 0.00 | H |
| ATOM | 610 | HD1 PHE  | 39 | 1.434  | -1.507  | 2.778  | 1.00 | 0.00 | H |
| ATOM | 611 | HE1 PHE  | 39 | 1.354  | 0.352   | 4.374  | 1.00 | 0.00 | H |
| ATOM | 612 | HZ PHE   | 39 | -0.809 | 1.454   | 4.892  | 1.00 | 0.00 | H |
| ATOM | 613 | HE2 PHE  | 39 | -2.878 | 0.707   | 3.740  | 1.00 | 0.00 | H |
| ATOM | 614 | HD2 PHE  | 39 | -2.785 | -1.170  | 2.145  | 1.00 | 0.00 | H |
| ATOM | 615 | N THR    | 40 | -2.149 | -5.575  | 0.884  | 1.00 | 0.00 | N |
| ATOM | 616 | CA THR   | 40 | -2.464 | -6.768  | 0.141  | 1.00 | 0.00 | C |
| ATOM | 617 | C THR    | 40 | -2.783 | -6.403  | -1.301 | 1.00 | 0.00 | C |
| ATOM | 618 | O THR    | 40 | -3.646 | -5.565  | -1.571 | 1.00 | 0.00 | O |
| ATOM | 619 | CB THR   | 40 | -3.649 | -7.494  | 0.821  | 1.00 | 0.00 | C |
| ATOM | 620 | CG2 THR  | 40 | -4.080 | -8.741  | 0.048  | 1.00 | 0.00 | C |
| ATOM | 621 | OG1 THR  | 40 | -3.247 | -7.857  | 2.137  | 1.00 | 0.00 | O |
| ATOM | 622 | H THR    | 40 | -2.933 | -5.065  | 1.289  | 1.00 | 0.00 | H |
| ATOM | 623 | HA THR   | 40 | -1.605 | -7.414  | 0.116  | 1.00 | 0.00 | H |
| ATOM | 624 | HB THR   | 40 | -4.524 | -6.856  | 0.918  | 1.00 | 0.00 | H |
| ATOM | 625 | HG21 THR | 40 | -4.913 | -9.249  | 0.535  | 1.00 | 0.00 | H |
| ATOM | 626 | HG22 THR | 40 | -4.398 | -8.439  | -0.963 | 1.00 | 0.00 | H |
| ATOM | 627 | HG23 THR | 40 | -3.242 | -9.435  | -0.048 | 1.00 | 0.00 | H |
| ATOM | 628 | HG1 THR  | 40 | -3.075 | -7.027  | 2.575  | 1.00 | 0.00 | H |
| ATOM | 629 | N ILE    | 41 | -2.112 | -7.122  | -2.201 | 1.00 | 0.00 | N |
| ATOM | 630 | CA ILE   | 41 | -2.383 | -7.151  | -3.618 | 1.00 | 0.00 | C |
| ATOM | 631 | C ILE    | 41 | -3.591 | -8.073  | -3.830 | 1.00 | 0.00 | C |
| ATOM | 632 | O ILE    | 41 | -3.635 | -9.185  | -3.296 | 1.00 | 0.00 | O |
| ATOM | 633 | CB ILE   | 41 | -1.151 | -7.670  | -4.401 | 1.00 | 0.00 | C |
| ATOM | 634 | CG2 ILE  | 41 | -1.421 | -7.679  | -5.918 | 1.00 | 0.00 | C |
| ATOM | 635 | CG1 ILE  | 41 | 0.092  | -6.839  | -4.097 | 1.00 | 0.00 | C |
| ATOM | 636 | CD1 ILE  | 41 | 1.364  | -7.455  | -4.649 | 1.00 | 0.00 | C |
| ATOM | 637 | H ILE    | 41 | -1.442 | -7.807  | -1.856 | 1.00 | 0.00 | H |
| ATOM | 638 | HA ILE   | 41 | -2.585 | -6.140  | -3.920 | 1.00 | 0.00 | H |
| ATOM | 639 | HB ILE   | 41 | -0.882 | -8.670  | -4.070 | 1.00 | 0.00 | H |
| ATOM | 640 | HG21 ILE | 41 | -0.542 | -8.042  | -6.463 | 1.00 | 0.00 | H |
| ATOM | 641 | HG22 ILE | 41 | -2.272 | -8.328  | -6.160 | 1.00 | 0.00 | H |
| ATOM | 642 | HG23 ILE | 41 | -1.651 | -6.664  | -6.271 | 1.00 | 0.00 | H |
| ATOM | 643 | HG12 ILE | 41 | -0.020 | -5.850  | -4.530 | 1.00 | 0.00 | H |
| ATOM | 644 | HG13 ILE | 41 | 0.198  | -6.762  | -3.018 | 1.00 | 0.00 | H |
| ATOM | 645 | HD11 ILE | 41 | 2.213  | -6.821  | -4.391 | 1.00 | 0.00 | H |
| ATOM | 646 | HD12 ILE | 41 | 1.510  | -8.448  | -4.224 | 1.00 | 0.00 | H |
| ATOM | 647 | HD13 ILE | 41 | 1.291  | -7.535  | -5.736 | 1.00 | 0.00 | H |
| ATOM | 648 | N THR    | 42 | -4.563 | -7.612  | -4.614 | 1.00 | 0.00 | N |
| ATOM | 649 | CA THR   | 42 | -5.643 | -8.433  | -5.139 | 1.00 | 0.00 | C |
| ATOM | 650 | C THR    | 42 | -5.400 | -8.602  | -6.644 | 1.00 | 0.00 | C |
| ATOM | 651 | O THR    | 42 | -4.571 | -7.886  | -7.224 | 1.00 | 0.00 | O |
| ATOM | 652 | CB THR   | 42 | -7.020 | -7.771  | -4.885 | 1.00 | 0.00 | C |
| ATOM | 653 | CG2 THR  | 42 | -7.143 | -7.240  | -3.460 | 1.00 | 0.00 | C |

|      |     |          |    |         |         |         |      |      |     |
|------|-----|----------|----|---------|---------|---------|------|------|-----|
| ATOM | 654 | OG1 THR  | 42 | -7.314  | -6.707  | -5.778  | 1.00 | 0.00 | O   |
| ATOM | 655 | H THR    | 42 | -4.425  | -6.705  | -5.067  | 1.00 | 0.00 | H   |
| ATOM | 656 | HA THR   | 42 | -5.620  | -9.391  | -4.626  | 1.00 | 0.00 | H   |
| ATOM | 657 | HB THR   | 42 | -7.793  | -8.539  | -5.048  | 1.00 | 0.00 | H   |
| ATOM | 658 | HG21 THR | 42 | -8.125  | -6.793  | -3.315  | 1.00 | 0.00 | H   |
| ATOM | 659 | HG22 THR | 42 | -7.005  | -8.049  | -2.736  | 1.00 | 0.00 | H   |
| ATOM | 660 | HG23 THR | 42 | -6.374  | -6.478  | -3.285  | 1.00 | 0.00 | H   |
| ATOM | 661 | HG1 THR  | 42 | -6.691  | -5.999  | -5.628  | 1.00 | 0.00 | H   |
| ATOM | 662 | N PRO    | 43 | -6.157  | -9.484  | -7.324  | 1.00 | 0.00 | N   |
| ATOM | 663 | CA PRO   | 43 | -5.990  | -9.650  | -8.766  | 1.00 | 0.00 | C   |
| ATOM | 664 | C PRO    | 43 | -6.439  | -8.415  | -9.570  | 1.00 | 0.00 | C   |
| ATOM | 665 | O PRO    | 43 | -6.115  | -8.334  | -10.749 | 1.00 | 0.00 | O   |
| ATOM | 666 | CD PRO   | 43 | -7.072  | -10.488 | -6.768  | 1.00 | 0.00 | C   |
| ATOM | 667 | CG PRO   | 43 | -7.100  | -11.570 | -7.831  | 1.00 | 0.00 | C   |
| ATOM | 668 | CB PRO   | 43 | -6.924  | -10.809 | -9.120  | 1.00 | 0.00 | C   |
| ATOM | 669 | HD3 PRO  | 43 | -6.772  | -10.898 | -5.815  | 1.00 | 0.00 | H   |
| ATOM | 670 | HD2 PRO  | 43 | -8.093  | -10.067 | -6.670  | 1.00 | 0.00 | H   |
| ATOM | 671 | HG3 PRO  | 43 | -6.245  | -12.251 | -7.672  | 1.00 | 0.00 | H   |
| ATOM | 672 | HG2 PRO  | 43 | -8.015  | -12.144 | -7.825  | 1.00 | 0.00 | H   |
| ATOM | 673 | HB3 PRO  | 43 | -6.501  | -11.441 | -9.889  | 1.00 | 0.00 | H   |
| ATOM | 674 | HB2 PRO  | 43 | -7.901  | -10.437 | -9.446  | 1.00 | 0.00 | H   |
| ATOM | 675 | HA PRO   | 43 | -4.937  | -9.855  | -8.975  | 1.00 | 0.00 | H   |
| ATOM | 676 | N GLN    | 44 | -7.186  | -7.478  | -8.954  | 1.00 | 0.00 | N   |
| ATOM | 677 | CA GLN   | 44 | -7.590  | -6.224  | -9.576  | 1.00 | 0.00 | C   |
| ATOM | 678 | C GLN    | 44 | -6.815  | -5.017  | -9.044  | 1.00 | 0.00 | C   |
| ATOM | 679 | O GLN    | 44 | -7.179  | -3.879  | -9.350  | 1.00 | 0.00 | O   |
| ATOM | 680 | CB GLN   | 44 | -9.088  | -5.938  | -9.332  | 1.00 | 0.00 | C   |
| ATOM | 681 | CG GLN   | 44 | -10.073 | -6.859  | -10.062 | 1.00 | 0.00 | C   |
| ATOM | 682 | CD GLN   | 44 | -10.073 | -6.822  | -11.598 | 1.00 | 0.00 | C   |
| ATOM | 683 | OE1 GLN  | 44 | -9.255  | -6.179  | -12.250 | 1.00 | 0.00 | O   |
| ATOM | 684 | NE2 GLN  | 44 | -11.042 | -7.503  | -12.203 | 1.00 | 0.00 | N   |
| ATOM | 685 | H GLN    | 44 | -7.363  | -7.556  | -7.963  | 1.00 | 0.00 | H   |
| ATOM | 686 | HA GLN   | 44 | -7.333  | -6.283  | -10.623 | 1.00 | 0.00 | H   |
| ATOM | 687 | HB2 GLN  | 44 | -9.295  | -5.997  | -8.249  | 1.00 | 0.00 | H   |
| ATOM | 688 | HB3 GLN  | 44 | -9.294  | -4.914  | -9.661  | 1.00 | 0.00 | H   |
| ATOM | 689 | HG2 GLN  | 44 | -9.882  | -7.868  | -9.702  | 1.00 | 0.00 | H   |
| ATOM | 690 | HG3 GLN  | 44 | -11.075 | -6.549  | -9.762  | 1.00 | 0.00 | H   |
| ATOM | 691 | HE22 GLN | 44 | -11.141 | -7.473  | -13.209 | 1.00 | 0.00 | H   |
| ATOM | 692 | HE21 GLN | 44 | -11.776 | -7.941  | -11.666 | 1.00 | 0.00 | H   |
| ATOM | 693 | N THR    | 45 | -5.746  | -5.219  | -8.270  | 1.00 | 0.00 | N   |
| ATOM | 694 | CA THR   | 45 | -4.890  | -4.109  | -7.900  | 1.00 | 0.00 | C   |
| ATOM | 695 | C THR    | 45 | -4.193  | -3.593  | -9.171  | 1.00 | 0.00 | C   |
| ATOM | 696 | O THR    | 45 | -3.593  | -4.373  | -9.915  | 1.00 | 0.00 | O   |
| ATOM | 697 | CB THR   | 45 | -3.829  | -4.565  | -6.899  | 1.00 | 0.00 | C   |
| ATOM | 698 | CG2 THR  | 45 | -2.940  | -3.382  | -6.541  | 1.00 | 0.00 | C   |
| ATOM | 699 | OG1 THR  | 45 | -4.453  | -5.045  | -5.713  | 1.00 | 0.00 | O   |
| ATOM | 700 | H THR    | 45 | -5.414  | -6.155  | -8.085  | 1.00 | 0.00 | H   |
| ATOM | 701 | HA THR   | 45 | -5.479  | -3.328  | -7.421  | 1.00 | 0.00 | H   |
| ATOM | 702 | HB THR   | 45 | -3.197  | -5.328  | -7.350  | 1.00 | 0.00 | H   |
| ATOM | 703 | HG21 THR | 45 | -2.174  | -3.687  | -5.841  | 1.00 | 0.00 | H   |
| ATOM | 704 | HG22 THR | 45 | -2.462  | -2.996  | -7.456  | 1.00 | 0.00 | H   |
| ATOM | 705 | HG23 THR | 45 | -3.547  | -2.586  | -6.106  | 1.00 | 0.00 | H   |
| ATOM | 706 | HG1 THR  | 45 | -4.877  | -4.291  | -5.284  | 1.00 | 0.00 | H   |
| ATOM | 707 | N LYS    | 46 | -4.208  | -2.274  | -9.369  | 1.00 | 0.00 | N   |
| ATOM | 708 | CA LYS   | 46 | -3.502  | -1.644  | -10.461 | 1.00 | 0.00 | C   |
| ATOM | 709 | C LYS    | 46 | -2.035  | -1.436  | -10.111 | 1.00 | 0.00 | C   |
| ATOM | 710 | O LYS    | 46 | -1.615  | -0.391  | -9.608  | 1.00 | 0.00 | O   |
| ATOM | 711 | CB LYS   | 46 | -4.179  | -0.316  | -10.802 | 1.00 | 0.00 | C   |
| ATOM | 712 | CG LYS   | 46 | -5.615  | -0.499  | -11.282 | 1.00 | 0.00 | C   |
| ATOM | 713 | CD LYS   | 46 | -6.010  | 0.572   | -12.287 | 1.00 | 0.00 | C   |
| ATOM | 714 | CE LYS   | 46 | -7.037  | 0.055   | -13.280 | 1.00 | 0.00 | C   |
| ATOM | 715 | NZ LYS   | 46 | -7.531  | 1.117   | -14.176 | 1.00 | 0.00 | N1+ |
| ATOM | 716 | H LYS    | 46 | -4.721  | -1.680  | -8.717  | 1.00 | 0.00 | H   |
| ATOM | 717 | HA LYS   | 46 | -3.496  | -2.335  | -11.291 | 1.00 | 0.00 | H   |
| ATOM | 718 | HB2 LYS  | 46 | -4.183  | 0.328   | -9.923  | 1.00 | 0.00 | H   |
| ATOM | 719 | HB3 LYS  | 46 | -3.609  | 0.164   | -11.600 | 1.00 | 0.00 | H   |

|      |     |          |    |        |        |         |      |      |     |
|------|-----|----------|----|--------|--------|---------|------|------|-----|
| ATOM | 720 | HG2 LYS  | 46 | -5.710 | -1.480 | -11.751 | 1.00 | 0.00 | H   |
| ATOM | 721 | HG3 LYS  | 46 | -6.283 | -0.448 | -10.419 | 1.00 | 0.00 | H   |
| ATOM | 722 | HD2 LYS  | 46 | -6.424 | 1.409  | -11.736 | 1.00 | 0.00 | H   |
| ATOM | 723 | HD3 LYS  | 46 | -5.110 | 0.882  | -12.814 | 1.00 | 0.00 | H   |
| ATOM | 724 | HE2 LYS  | 46 | -6.574 | -0.761 | -13.847 | 1.00 | 0.00 | H   |
| ATOM | 725 | HE3 LYS  | 46 | -7.883 | -0.339 | -12.718 | 1.00 | 0.00 | H   |
| ATOM | 726 | HZ1 LYS  | 46 | -8.444 | 0.814  | -14.525 | 1.00 | 0.00 | H   |
| ATOM | 727 | HZ2 LYS  | 46 | -7.653 | 1.985  | -13.675 | 1.00 | 0.00 | H   |
| ATOM | 728 | HZ3 LYS  | 46 | -6.902 | 1.264  | -14.965 | 1.00 | 0.00 | H   |
| ATOM | 729 | N MET    | 47 | -1.275 | -2.493 | -10.386 | 1.00 | 0.00 | N   |
| ATOM | 730 | CA MET   | 47 | 0.136  | -2.574 | -10.104 | 1.00 | 0.00 | C   |
| ATOM | 731 | C MET    | 47 | 0.948  | -1.848 | -11.168 | 1.00 | 0.00 | C   |
| ATOM | 732 | O MET    | 47 | 0.686  | -1.974 | -12.371 | 1.00 | 0.00 | O   |
| ATOM | 733 | CB MET   | 47 | 0.575  | -4.046 | -10.047 | 1.00 | 0.00 | C   |
| ATOM | 734 | CG MET   | 47 | -0.029 | -4.818 | -8.878  | 1.00 | 0.00 | C   |
| ATOM | 735 | SD MET   | 47 | 0.523  | -4.269 | -7.241  | 1.00 | 0.00 | S   |
| ATOM | 736 | CE MET   | 47 | 2.296  | -4.608 | -7.383  | 1.00 | 0.00 | C   |
| ATOM | 737 | H MET    | 47 | -1.738 | -3.321 | -10.741 | 1.00 | 0.00 | H   |
| ATOM | 738 | HA MET   | 47 | 0.306  | -2.080 | -9.165  | 1.00 | 0.00 | H   |
| ATOM | 739 | HB2 MET  | 47 | 0.287  | -4.557 | -10.970 | 1.00 | 0.00 | H   |
| ATOM | 740 | HB3 MET  | 47 | 1.661  | -4.100 | -9.935  | 1.00 | 0.00 | H   |
| ATOM | 741 | HG2 MET  | 47 | -1.113 | -4.710 | -8.924  | 1.00 | 0.00 | H   |
| ATOM | 742 | HG3 MET  | 47 | 0.230  | -5.875 | -9.000  | 1.00 | 0.00 | H   |
| ATOM | 743 | HE1 MET  | 47 | 2.784  | -4.303 | -6.458  | 1.00 | 0.00 | H   |
| ATOM | 744 | HE2 MET  | 47 | 2.451  | -5.678 | -7.538  | 1.00 | 0.00 | H   |
| ATOM | 745 | HE3 MET  | 47 | 2.748  | -4.062 | -8.221  | 1.00 | 0.00 | H   |
| ATOM | 746 | N SER    | 48 | 1.954  | -1.117 | -10.689 | 1.00 | 0.00 | N   |
| ATOM | 747 | CA SER   | 48 | 3.075  | -0.654 | -11.482 | 1.00 | 0.00 | C   |
| ATOM | 748 | C SER    | 48 | 4.333  | -1.375 | -11.006 | 1.00 | 0.00 | C   |
| ATOM | 749 | O SER    | 48 | 4.321  | -2.004 | -9.944  | 1.00 | 0.00 | O   |
| ATOM | 750 | CB SER   | 48 | 3.255  | 0.863  | -11.338 | 1.00 | 0.00 | C   |
| ATOM | 751 | OG SER   | 48 | 2.002  | 1.506  | -11.528 | 1.00 | 0.00 | O   |
| ATOM | 752 | H SER    | 48 | 2.121  | -1.128 | -9.692  | 1.00 | 0.00 | H   |
| ATOM | 753 | HA SER   | 48 | 2.908  | -0.925 | -12.501 | 1.00 | 0.00 | H   |
| ATOM | 754 | HB2 SER  | 48 | 3.642  | 1.097  | -10.341 | 1.00 | 0.00 | H   |
| ATOM | 755 | HB3 SER  | 48 | 3.990  | 1.202  | -12.084 | 1.00 | 0.00 | H   |
| ATOM | 756 | HG SER   | 48 | 1.445  | 1.165  | -10.833 | 1.00 | 0.00 | H   |
| ATOM | 757 | N GLU    | 49 | 5.411  | -1.256 | -11.789 | 1.00 | 0.00 | N   |
| ATOM | 758 | CA GLU   | 49 | 6.739  | -1.741 | -11.445 | 1.00 | 0.00 | C   |
| ATOM | 759 | C GLU    | 49 | 7.249  | -0.951 | -10.239 | 1.00 | 0.00 | C   |
| ATOM | 760 | O GLU    | 49 | 7.313  | 0.280  | -10.289 | 1.00 | 0.00 | O   |
| ATOM | 761 | CB GLU   | 49 | 7.691  | -1.616 | -12.656 | 1.00 | 0.00 | C   |
| ATOM | 762 | CG GLU   | 49 | 7.196  | -2.309 | -13.926 | 1.00 | 0.00 | C   |
| ATOM | 763 | CD GLU   | 49 | 7.715  | -3.728 | -13.993 | 1.00 | 0.00 | C   |
| ATOM | 764 | OE1 GLU  | 49 | 6.852  | -4.624 | -14.004 | 1.00 | 0.00 | O   |
| ATOM | 765 | OE2 GLU  | 49 | 8.962  | -3.847 | -13.962 | 1.00 | 0.00 | O1- |
| ATOM | 766 | H GLU    | 49 | 5.342  | -0.768 | -12.668 | 1.00 | 0.00 | H   |
| ATOM | 767 | HA GLU   | 49 | 6.637  | -2.771 | -11.152 | 1.00 | 0.00 | H   |
| ATOM | 768 | HB2 GLU  | 49 | 7.849  | -0.576 | -12.917 | 1.00 | 0.00 | H   |
| ATOM | 769 | HB3 GLU  | 49 | 8.658  | -2.078 | -12.410 | 1.00 | 0.00 | H   |
| ATOM | 770 | HG2 GLU  | 49 | 6.107  | -2.296 | -13.960 | 1.00 | 0.00 | H   |
| ATOM | 771 | HG3 GLU  | 49 | 7.593  | -1.815 | -14.813 | 1.00 | 0.00 | H   |
| ATOM | 772 | N ILE    | 50 | 7.517  | -1.669 | -9.147  | 1.00 | 0.00 | N   |
| ATOM | 773 | CA ILE   | 50 | 7.989  | -1.151 | -7.876  | 1.00 | 0.00 | C   |
| ATOM | 774 | C ILE    | 50 | 9.086  | -2.059 | -7.342  | 1.00 | 0.00 | C   |
| ATOM | 775 | O ILE    | 50 | 9.123  | -3.254 | -7.651  | 1.00 | 0.00 | O   |
| ATOM | 776 | CB ILE   | 50 | 6.837  | -0.914 | -6.845  | 1.00 | 0.00 | C   |
| ATOM | 777 | CG2 ILE  | 50 | 5.860  | 0.178  | -7.325  | 1.00 | 0.00 | C   |
| ATOM | 778 | CG1 ILE  | 50 | 6.086  | -2.205 | -6.499  | 1.00 | 0.00 | C   |
| ATOM | 779 | CD1 ILE  | 50 | 5.080  | -2.072 | -5.368  | 1.00 | 0.00 | C   |
| ATOM | 780 | H ILE    | 50 | 7.462  | -2.676 | -9.203  | 1.00 | 0.00 | H   |
| ATOM | 781 | HA ILE   | 50 | 8.486  | -0.224 | -8.120  | 1.00 | 0.00 | H   |
| ATOM | 782 | HB ILE   | 50 | 7.282  | -0.627 | -5.885  | 1.00 | 0.00 | H   |
| ATOM | 783 | HG21 ILE | 50 | 5.075  | 0.354  | -6.582  | 1.00 | 0.00 | H   |
| ATOM | 784 | HG22 ILE | 50 | 6.391  | 1.121  | -7.504  | 1.00 | 0.00 | H   |
| ATOM | 785 | HG23 ILE | 50 | 5.386  | -0.136 | -8.265  | 1.00 | 0.00 | H   |

|      |     |      |     |    |        |        |        |      |      |     |
|------|-----|------|-----|----|--------|--------|--------|------|------|-----|
| ATOM | 786 | HG12 | ILE | 50 | 5.548  | -2.549 | -7.373 | 1.00 | 0.00 | H   |
| ATOM | 787 | HG13 | ILE | 50 | 6.815  | -2.952 | -6.191 | 1.00 | 0.00 | H   |
| ATOM | 788 | HD11 | ILE | 50 | 4.607  | -3.041 | -5.193 | 1.00 | 0.00 | H   |
| ATOM | 789 | HD12 | ILE | 50 | 5.583  | -1.747 | -4.459 | 1.00 | 0.00 | H   |
| ATOM | 790 | HD13 | ILE | 50 | 4.315  | -1.344 | -5.641 | 1.00 | 0.00 | H   |
| ATOM | 791 | N    | LYS | 51 | 9.936  | -1.495 | -6.492 | 1.00 | 0.00 | N   |
| ATOM | 792 | CA   | LYS | 51 | 10.963 | -2.205 | -5.770 | 1.00 | 0.00 | C   |
| ATOM | 793 | C    | LYS | 51 | 11.094 | -1.727 | -4.330 | 1.00 | 0.00 | C   |
| ATOM | 794 | O    | LYS | 51 | 10.514 | -0.726 | -3.924 | 1.00 | 0.00 | O   |
| ATOM | 795 | CB   | LYS | 51 | 12.262 | -2.221 | -6.605 | 1.00 | 0.00 | C   |
| ATOM | 796 | CG   | LYS | 51 | 12.955 | -0.874 | -6.767 | 1.00 | 0.00 | C   |
| ATOM | 797 | CD   | LYS | 51 | 14.193 | -0.989 | -7.650 | 1.00 | 0.00 | C   |
| ATOM | 798 | CE   | LYS | 51 | 14.995 | 0.304  | -7.667 | 1.00 | 0.00 | C   |
| ATOM | 799 | NZ   | LYS | 51 | 16.058 | 0.260  | -8.688 | 1.00 | 0.00 | N1+ |
| ATOM | 800 | H    | LYS | 51 | 9.943  | -0.465 | -6.434 | 1.00 | 0.00 | H   |
| ATOM | 801 | HA   | LYS | 51 | 10.586 | -3.212 | -5.598 | 1.00 | 0.00 | H   |
| ATOM | 802 | HB2  | LYS | 51 | 12.976 | -2.875 | -6.121 | 1.00 | 0.00 | H   |
| ATOM | 803 | HB3  | LYS | 51 | 12.063 | -2.579 | -7.619 | 1.00 | 0.00 | H   |
| ATOM | 804 | HG2  | LYS | 51 | 12.259 | -0.164 | -7.223 | 1.00 | 0.00 | H   |
| ATOM | 805 | HG3  | LYS | 51 | 13.250 | -0.506 | -5.784 | 1.00 | 0.00 | H   |
| ATOM | 806 | HD2  | LYS | 51 | 14.815 | -1.800 | -7.267 | 1.00 | 0.00 | H   |
| ATOM | 807 | HD3  | LYS | 51 | 13.876 | -1.225 | -8.666 | 1.00 | 0.00 | H   |
| ATOM | 808 | HE2  | LYS | 51 | 14.326 | 1.129  | -7.900 | 1.00 | 0.00 | H   |
| ATOM | 809 | HE3  | LYS | 51 | 15.417 | 0.459  | -6.665 | 1.00 | 0.00 | H   |
| ATOM | 810 | HZ1  | LYS | 51 | 16.667 | 1.050  | -8.558 | 1.00 | 0.00 | H   |
| ATOM | 811 | HZ2  | LYS | 51 | 16.567 | -0.626 | -8.637 | 1.00 | 0.00 | H   |
| ATOM | 812 | HZ3  | LYS | 51 | 15.689 | 0.311  | -9.638 | 1.00 | 0.00 | H   |
| ATOM | 813 | N    | THR | 52 | 11.848 | -2.471 | -3.523 | 1.00 | 0.00 | N   |
| ATOM | 814 | CA   | THR | 52 | 12.164 | -2.082 | -2.164 | 1.00 | 0.00 | C   |
| ATOM | 815 | C    | THR | 52 | 13.036 | -0.822 | -2.181 | 1.00 | 0.00 | C   |
| ATOM | 816 | O    | THR | 52 | 14.062 | -0.766 | -2.863 | 1.00 | 0.00 | O   |
| ATOM | 817 | CB   | THR | 52 | 12.879 | -3.261 | -1.469 | 1.00 | 0.00 | C   |
| ATOM | 818 | CG2  | THR | 52 | 13.342 | -2.883 | -0.069 | 1.00 | 0.00 | C   |
| ATOM | 819 | OG1  | THR | 52 | 12.031 | -4.394 | -1.379 | 1.00 | 0.00 | O   |
| ATOM | 820 | H    | THR | 52 | 12.254 | -3.328 | -3.860 | 1.00 | 0.00 | H   |
| ATOM | 821 | HA   | THR | 52 | 11.258 | -1.780 | -1.641 | 1.00 | 0.00 | H   |
| ATOM | 822 | HB   | THR | 52 | 13.752 | -3.570 | -2.038 | 1.00 | 0.00 | H   |
| ATOM | 823 | HG21 | THR | 52 | 13.855 | -3.718 | 0.402  | 1.00 | 0.00 | H   |
| ATOM | 824 | HG22 | THR | 52 | 14.032 | -2.032 | -0.141 | 1.00 | 0.00 | H   |
| ATOM | 825 | HG23 | THR | 52 | 12.485 | -2.590 | 0.539  | 1.00 | 0.00 | H   |
| ATOM | 826 | HG1  | THR | 52 | 12.592 | -5.159 | -1.280 | 1.00 | 0.00 | H   |
| ATOM | 827 | N    | GLY | 53 | 12.588 | 0.174  | -1.415 | 1.00 | 0.00 | N   |
| ATOM | 828 | CA   | GLY | 53 | 13.234 | 1.455  | -1.257 | 1.00 | 0.00 | C   |
| ATOM | 829 | C    | GLY | 53 | 12.542 | 2.551  | -2.040 | 1.00 | 0.00 | C   |
| ATOM | 830 | O    | GLY | 53 | 12.827 | 3.726  | -1.812 | 1.00 | 0.00 | O   |
| ATOM | 831 | H    | GLY | 53 | 11.749 | 0.033  | -0.857 | 1.00 | 0.00 | H   |
| ATOM | 832 | HA2  | GLY | 53 | 13.204 | 1.771  | -0.215 | 1.00 | 0.00 | H   |
| ATOM | 833 | HA3  | GLY | 53 | 14.251 | 1.355  | -1.593 | 1.00 | 0.00 | H   |
| ATOM | 834 | N    | ASP | 54 | 11.626 | 2.167  | -2.935 | 1.00 | 0.00 | N   |
| ATOM | 835 | CA   | ASP | 54 | 10.875 | 3.081  | -3.769 | 1.00 | 0.00 | C   |
| ATOM | 836 | C    | ASP | 54 | 9.922  | 3.918  | -2.934 | 1.00 | 0.00 | C   |
| ATOM | 837 | O    | ASP | 54 | 9.193  | 3.389  | -2.089 | 1.00 | 0.00 | O   |
| ATOM | 838 | CB   | ASP | 54 | 10.051 | 2.341  | -4.830 | 1.00 | 0.00 | C   |
| ATOM | 839 | CG   | ASP | 54 | 10.826 | 1.930  | -6.077 | 1.00 | 0.00 | C   |
| ATOM | 840 | OD1  | ASP | 54 | 12.017 | 2.290  | -6.230 | 1.00 | 0.00 | O   |
| ATOM | 841 | OD2  | ASP | 54 | 10.204 | 1.185  | -6.862 | 1.00 | 0.00 | O1- |
| ATOM | 842 | H    | ASP | 54 | 11.478 | 1.179  | -3.094 | 1.00 | 0.00 | H   |
| ATOM | 843 | HA   | ASP | 54 | 11.585 | 3.734  | -4.249 | 1.00 | 0.00 | H   |
| ATOM | 844 | HB2  | ASP | 54 | 9.680  | 1.396  | -4.426 | 1.00 | 0.00 | H   |
| ATOM | 845 | HB3  | ASP | 54 | 9.190  | 2.973  | -5.090 | 1.00 | 0.00 | H   |
| ATOM | 846 | N    | LYS | 55 | 9.898  | 5.222  | -3.222 | 1.00 | 0.00 | N   |
| ATOM | 847 | CA   | LYS | 55 | 8.927  | 6.134  | -2.667 | 1.00 | 0.00 | C   |
| ATOM | 848 | C    | LYS | 55 | 7.671  | 6.042  | -3.526 | 1.00 | 0.00 | C   |
| ATOM | 849 | O    | LYS | 55 | 7.675  | 6.435  | -4.694 | 1.00 | 0.00 | O   |
| ATOM | 850 | CB   | LYS | 55 | 9.454  | 7.581  | -2.712 | 1.00 | 0.00 | C   |
| ATOM | 851 | CG   | LYS | 55 | 8.481  | 8.600  | -2.122 | 1.00 | 0.00 | C   |

|      |     |      |     |    |        |        |        |      |      |     |
|------|-----|------|-----|----|--------|--------|--------|------|------|-----|
| ATOM | 852 | CD   | LYS | 55 | 8.190  | 8.349  | -0.647 | 1.00 | 0.00 | C   |
| ATOM | 853 | CE   | LYS | 55 | 6.904  | 9.032  | -0.201 | 1.00 | 0.00 | C   |
| ATOM | 854 | NZ   | LYS | 55 | 5.878  | 9.041  | -1.253 | 1.00 | 0.00 | N1+ |
| ATOM | 855 | H    | LYS | 55 | 10.494 | 5.553  | -3.968 | 1.00 | 0.00 | H   |
| ATOM | 856 | HA   | LYS | 55 | 8.716  | 5.840  | -1.646 | 1.00 | 0.00 | H   |
| ATOM | 857 | HB2  | LYS | 55 | 10.381 | 7.660  | -2.146 | 1.00 | 0.00 | H   |
| ATOM | 858 | HB3  | LYS | 55 | 9.638  | 7.868  | -3.749 | 1.00 | 0.00 | H   |
| ATOM | 859 | HG2  | LYS | 55 | 8.902  | 9.598  | -2.228 | 1.00 | 0.00 | H   |
| ATOM | 860 | HG3  | LYS | 55 | 7.536  | 8.545  | -2.668 | 1.00 | 0.00 | H   |
| ATOM | 861 | HD2  | LYS | 55 | 8.107  | 7.272  | -0.471 | 1.00 | 0.00 | H   |
| ATOM | 862 | HD3  | LYS | 55 | 9.019  | 8.740  | -0.047 | 1.00 | 0.00 | H   |
| ATOM | 863 | HE2  | LYS | 55 | 6.572  | 8.583  | 0.741  | 1.00 | 0.00 | H   |
| ATOM | 864 | HE3  | LYS | 55 | 7.078  | 10.086 | -0.067 | 1.00 | 0.00 | H   |
| ATOM | 865 | HZ1  | LYS | 55 | 5.117  | 9.623  | -0.932 | 1.00 | 0.00 | H   |
| ATOM | 866 | HZ2  | LYS | 55 | 6.251  | 9.460  | -2.090 | 1.00 | 0.00 | H   |
| ATOM | 867 | HZ3  | LYS | 55 | 5.527  | 8.108  | -1.456 | 1.00 | 0.00 | H   |
| ATOM | 868 | N    | VAL | 56 | 6.576  | 5.597  | -2.919 | 1.00 | 0.00 | N   |
| ATOM | 869 | CA   | VAL | 56 | 5.333  | 5.299  | -3.597 | 1.00 | 0.00 | C   |
| ATOM | 870 | C    | VAL | 56 | 4.211  | 6.219  | -3.171 | 1.00 | 0.00 | C   |
| ATOM | 871 | O    | VAL | 56 | 4.272  | 6.889  | -2.130 | 1.00 | 0.00 | O   |
| ATOM | 872 | CB   | VAL | 56 | 4.992  | 3.780  | -3.489 | 1.00 | 0.00 | C   |
| ATOM | 873 | CG1  | VAL | 56 | 6.008  | 2.930  | -4.280 | 1.00 | 0.00 | C   |
| ATOM | 874 | CG2  | VAL | 56 | 4.874  | 3.278  | -2.053 | 1.00 | 0.00 | C   |
| ATOM | 875 | H    | VAL | 56 | 6.637  | 5.334  | -1.936 | 1.00 | 0.00 | H   |
| ATOM | 876 | HA   | VAL | 56 | 5.426  | 5.636  | -4.619 | 1.00 | 0.00 | H   |
| ATOM | 877 | HB   | VAL | 56 | 3.983  | 3.595  | -3.859 | 1.00 | 0.00 | H   |
| ATOM | 878 | HG11 | VAL | 56 | 5.762  | 1.861  | -4.223 | 1.00 | 0.00 | H   |
| ATOM | 879 | HG12 | VAL | 56 | 6.027  | 3.222  | -5.339 | 1.00 | 0.00 | H   |
| ATOM | 880 | HG13 | VAL | 56 | 7.019  | 3.070  | -3.869 | 1.00 | 0.00 | H   |
| ATOM | 881 | HG21 | VAL | 56 | 4.625  | 2.209  | -2.034 | 1.00 | 0.00 | H   |
| ATOM | 882 | HG22 | VAL | 56 | 5.812  | 3.433  | -1.524 | 1.00 | 0.00 | H   |
| ATOM | 883 | HG23 | VAL | 56 | 4.078  | 3.833  | -1.554 | 1.00 | 0.00 | H   |
| ATOM | 884 | N    | ALA | 57 | 3.234  | 6.266  | -4.076 | 1.00 | 0.00 | N   |
| ATOM | 885 | CA   | ALA | 57 | 1.902  | 6.768  | -3.897 | 1.00 | 0.00 | C   |
| ATOM | 886 | C    | ALA | 57 | 0.985  | 5.572  | -4.125 | 1.00 | 0.00 | C   |
| ATOM | 887 | O    | ALA | 57 | 1.240  | 4.772  | -5.031 | 1.00 | 0.00 | O   |
| ATOM | 888 | CB   | ALA | 57 | 1.607  | 7.895  | -4.883 | 1.00 | 0.00 | C   |
| ATOM | 889 | H    | ALA | 57 | 3.325  | 5.646  | -4.882 | 1.00 | 0.00 | H   |
| ATOM | 890 | HA   | ALA | 57 | 1.847  | 7.139  | -2.896 | 1.00 | 0.00 | H   |
| ATOM | 891 | HB1  | ALA | 57 | 0.611  | 8.313  | -4.687 | 1.00 | 0.00 | H   |
| ATOM | 892 | HB2  | ALA | 57 | 2.350  | 8.686  | -4.760 | 1.00 | 0.00 | H   |
| ATOM | 893 | HB3  | ALA | 57 | 1.637  | 7.533  | -5.914 | 1.00 | 0.00 | H   |
| ATOM | 894 | N    | PHE | 58 | -0.030 | 5.416  | -3.281 | 1.00 | 0.00 | N   |
| ATOM | 895 | CA   | PHE | 58 | -0.938 | 4.285  | -3.320 | 1.00 | 0.00 | C   |
| ATOM | 896 | C    | PHE | 58 | -2.296 | 4.638  | -2.763 | 1.00 | 0.00 | C   |
| ATOM | 897 | O    | PHE | 58 | -2.442 | 5.578  | -1.977 | 1.00 | 0.00 | O   |
| ATOM | 898 | CB   | PHE | 58 | -0.317 | 3.024  | -2.665 | 1.00 | 0.00 | C   |
| ATOM | 899 | CG   | PHE | 58 | -0.015 | 3.141  | -1.190 | 1.00 | 0.00 | C   |
| ATOM | 900 | CD1  | PHE | 58 | -0.866 | 2.537  | -0.255 | 1.00 | 0.00 | C   |
| ATOM | 901 | CE1  | PHE | 58 | -0.604 | 2.655  | 1.114  | 1.00 | 0.00 | C   |
| ATOM | 902 | CZ   | PHE | 58 | 0.517  | 3.370  | 1.556  | 1.00 | 0.00 | C   |
| ATOM | 903 | CE2  | PHE | 58 | 1.369  | 3.981  | 0.627  | 1.00 | 0.00 | C   |
| ATOM | 904 | CD2  | PHE | 58 | 1.108  | 3.854  | -0.744 | 1.00 | 0.00 | C   |
| ATOM | 905 | H    | PHE | 58 | -0.203 | 6.094  | -2.540 | 1.00 | 0.00 | H   |
| ATOM | 906 | HA   | PHE | 58 | -1.190 | 4.111  | -4.365 | 1.00 | 0.00 | H   |
| ATOM | 907 | HB2  | PHE | 58 | -1.013 | 2.181  | -2.767 | 1.00 | 0.00 | H   |
| ATOM | 908 | HB3  | PHE | 58 | 0.629  | 2.759  | -3.138 | 1.00 | 0.00 | H   |
| ATOM | 909 | HD1  | PHE | 58 | -1.724 | 1.991  | -0.589 | 1.00 | 0.00 | H   |
| ATOM | 910 | HE1  | PHE | 58 | -1.279 | 2.216  | 1.817  | 1.00 | 0.00 | H   |
| ATOM | 911 | HZ   | PHE | 58 | 0.700  | 3.475  | 2.603  | 1.00 | 0.00 | H   |
| ATOM | 912 | HE2  | PHE | 58 | 2.215  | 4.546  | 0.966  | 1.00 | 0.00 | H   |
| ATOM | 913 | HD2  | PHE | 58 | 1.757  | 4.316  | -1.456 | 1.00 | 0.00 | H   |
| ATOM | 914 | N    | ASN | 59 | -3.274 | 3.839  | -3.182 | 1.00 | 0.00 | N   |
| ATOM | 915 | CA   | ASN | 59 | -4.642 | 3.892  | -2.728 | 1.00 | 0.00 | C   |
| ATOM | 916 | C    | ASN | 59 | -5.033 | 2.532  | -2.171 | 1.00 | 0.00 | C   |
| ATOM | 917 | O    | ASN | 59 | -4.678 | 1.499  | -2.745 | 1.00 | 0.00 | O   |

|      |     |      |     |    |         |        |        |      |      |   |
|------|-----|------|-----|----|---------|--------|--------|------|------|---|
| ATOM | 918 | CB   | ASN | 59 | -5.587  | 4.298  | -3.869 | 1.00 | 0.00 | C |
| ATOM | 919 | CG   | ASN | 59 | -5.460  | 5.762  | -4.280 | 1.00 | 0.00 | C |
| ATOM | 920 | OD1  | ASN | 59 | -6.016  | 6.638  | -3.624 | 1.00 | 0.00 | O |
| ATOM | 921 | ND2  | ASN | 59 | -4.760  | 6.046  | -5.366 | 1.00 | 0.00 | N |
| ATOM | 922 | H    | ASN | 59 | -3.044  | 3.126  | -3.870 | 1.00 | 0.00 | H |
| ATOM | 923 | HA   | ASN | 59 | -4.686  | 4.605  | -1.921 | 1.00 | 0.00 | H |
| ATOM | 924 | HB2  | ASN | 59 | -5.425  | 3.629  | -4.724 | 1.00 | 0.00 | H |
| ATOM | 925 | HB3  | ASN | 59 | -6.616  | 4.186  | -3.525 | 1.00 | 0.00 | H |
| ATOM | 926 | HD22 | ASN | 59 | -4.719  | 6.975  | -5.744 | 1.00 | 0.00 | H |
| ATOM | 927 | HD21 | ASN | 59 | -4.285  | 5.270  | -5.877 | 1.00 | 0.00 | H |
| ATOM | 928 | N    | PHE | 60 | -5.787  | 2.521  | -1.073 | 1.00 | 0.00 | N |
| ATOM | 929 | CA   | PHE | 60 | -6.282  | 1.313  | -0.435 | 1.00 | 0.00 | C |
| ATOM | 930 | C    | PHE | 60 | -7.671  | 1.455  | 0.155  | 1.00 | 0.00 | C |
| ATOM | 931 | O    | PHE | 60 | -8.191  | 2.561  | 0.296  | 1.00 | 0.00 | O |
| ATOM | 932 | CB   | PHE | 60 | -5.229  | 0.703  | 0.534  | 1.00 | 0.00 | C |
| ATOM | 933 | CG   | PHE | 60 | -5.041  | 1.456  | 1.837  | 1.00 | 0.00 | C |
| ATOM | 934 | CD1  | PHE | 60 | -5.710  | 1.038  | 3.001  | 1.00 | 0.00 | C |
| ATOM | 935 | CE1  | PHE | 60 | -5.560  | 1.737  | 4.209  | 1.00 | 0.00 | C |
| ATOM | 936 | CZ   | PHE | 60 | -4.721  | 2.861  | 4.262  | 1.00 | 0.00 | C |
| ATOM | 937 | CE2  | PHE | 60 | -4.032  | 3.271  | 3.107  | 1.00 | 0.00 | C |
| ATOM | 938 | CD2  | PHE | 60 | -4.197  | 2.576  | 1.896  | 1.00 | 0.00 | C |
| ATOM | 939 | H    | PHE | 60 | -5.997  | 3.407  | -0.611 | 1.00 | 0.00 | H |
| ATOM | 940 | HA   | PHE | 60 | -6.544  | 0.645  | -1.249 | 1.00 | 0.00 | H |
| ATOM | 941 | HB2  | PHE | 60 | -5.544  | -0.311 | 0.810  | 1.00 | 0.00 | H |
| ATOM | 942 | HB3  | PHE | 60 | -4.238  | 0.642  | 0.067  | 1.00 | 0.00 | H |
| ATOM | 943 | HD1  | PHE | 60 | -6.347  | 0.180  | 2.965  | 1.00 | 0.00 | H |
| ATOM | 944 | HE1  | PHE | 60 | -6.090  | 1.415  | 5.088  | 1.00 | 0.00 | H |
| ATOM | 945 | HZ   | PHE | 60 | -4.613  | 3.406  | 5.184  | 1.00 | 0.00 | H |
| ATOM | 946 | HE2  | PHE | 60 | -3.379  | 4.120  | 3.151  | 1.00 | 0.00 | H |
| ATOM | 947 | HD2  | PHE | 60 | -3.682  | 2.897  | 1.008  | 1.00 | 0.00 | H |
| ATOM | 948 | N    | VAL | 61 | -8.253  | 0.299  | 0.485  | 1.00 | 0.00 | N |
| ATOM | 949 | CA   | VAL | 61 | -9.464  | 0.155  | 1.265  | 1.00 | 0.00 | C |
| ATOM | 950 | C    | VAL | 61 | -9.194  | -0.756 | 2.453  | 1.00 | 0.00 | C |
| ATOM | 951 | O    | VAL | 61 | -8.314  | -1.621 | 2.397  | 1.00 | 0.00 | O |
| ATOM | 952 | CB   | VAL | 61 | -10.669 | -0.297 | 0.399  | 1.00 | 0.00 | C |
| ATOM | 953 | CG1  | VAL | 61 | -10.947 | 0.677  | -0.764 | 1.00 | 0.00 | C |
| ATOM | 954 | CG2  | VAL | 61 | -10.542 | -1.722 | -0.102 | 1.00 | 0.00 | C |
| ATOM | 955 | H    | VAL | 61 | -7.755  | -0.561 | 0.272  | 1.00 | 0.00 | H |
| ATOM | 956 | HA   | VAL | 61 | -9.646  | 1.113  | 1.718  | 1.00 | 0.00 | H |
| ATOM | 957 | HB   | VAL | 61 | -11.548 | -0.400 | 1.035  | 1.00 | 0.00 | H |
| ATOM | 958 | HG11 | VAL | 61 | -11.820 | 0.352  | -1.345 | 1.00 | 0.00 | H |
| ATOM | 959 | HG12 | VAL | 61 | -11.140 | 1.689  | -0.388 | 1.00 | 0.00 | H |
| ATOM | 960 | HG13 | VAL | 61 | -10.081 | 0.718  | -1.438 | 1.00 | 0.00 | H |
| ATOM | 961 | HG21 | VAL | 61 | -11.425 | -1.996 | -0.683 | 1.00 | 0.00 | H |
| ATOM | 962 | HG22 | VAL | 61 | -9.654  | -1.816 | -0.714 | 1.00 | 0.00 | H |
| ATOM | 963 | HG23 | VAL | 61 | -10.466 | -2.382 | 0.765  | 1.00 | 0.00 | H |
| ATOM | 964 | N    | GLN | 62 | -9.978  | -0.562 | 3.514  | 1.00 | 0.00 | N |
| ATOM | 965 | CA   | GLN | 62 | -9.912  | -1.370 | 4.712  | 1.00 | 0.00 | C |
| ATOM | 966 | C    | GLN | 62 | -11.022 | -2.422 | 4.605  | 1.00 | 0.00 | C |
| ATOM | 967 | O    | GLN | 62 | -12.202 | -2.067 | 4.637  | 1.00 | 0.00 | O |
| ATOM | 968 | CB   | GLN | 62 | -10.168 | -0.490 | 5.951  | 1.00 | 0.00 | C |
| ATOM | 969 | CG   | GLN | 62 | -9.369  | 0.823  | 5.995  | 1.00 | 0.00 | C |
| ATOM | 970 | CD   | GLN | 62 | -9.402  | 1.596  | 7.313  | 1.00 | 0.00 | C |
| ATOM | 971 | OE1  | GLN | 62 | -8.577  | 2.477  | 7.520  | 1.00 | 0.00 | O |
| ATOM | 972 | NE2  | GLN | 62 | -10.291 | 1.266  | 8.238  | 1.00 | 0.00 | N |
| ATOM | 973 | H    | GLN | 62 | -10.715 | 0.125  | 3.460  | 1.00 | 0.00 | H |
| ATOM | 974 | HA   | GLN | 62 | -8.939  | -1.824 | 4.765  | 1.00 | 0.00 | H |
| ATOM | 975 | HB2  | GLN | 62 | -11.227 | -0.255 | 5.996  | 1.00 | 0.00 | H |
| ATOM | 976 | HB3  | GLN | 62 | -9.885  | -1.087 | 6.817  | 1.00 | 0.00 | H |
| ATOM | 977 | HG2  | GLN | 62 | -8.322  | 0.606  | 5.822  | 1.00 | 0.00 | H |
| ATOM | 978 | HG3  | GLN | 62 | -9.745  | 1.478  | 5.206  | 1.00 | 0.00 | H |
| ATOM | 979 | HE22 | GLN | 62 | -10.278 | 1.771  | 9.116  | 1.00 | 0.00 | H |
| ATOM | 980 | HE21 | GLN | 62 | -10.941 | 0.507  | 8.098  | 1.00 | 0.00 | H |
| ATOM | 981 | N    | GLN | 63 | -10.671 | -3.701 | 4.460  | 1.00 | 0.00 | N |
| ATOM | 982 | CA   | GLN | 63 | -11.634 | -4.782 | 4.302  | 1.00 | 0.00 | C |
| ATOM | 983 | C    | GLN | 63 | -11.204 | -6.010 | 5.107  | 1.00 | 0.00 | C |

|      |      |      |     |    |         |         |        |      |      |   |
|------|------|------|-----|----|---------|---------|--------|------|------|---|
| ATOM | 984  | O    | GLN | 63 | -10.248 | -6.705  | 4.756  | 1.00 | 0.00 | O |
| ATOM | 985  | CB   | GLN | 63 | -11.872 | -5.093  | 2.802  | 1.00 | 0.00 | C |
| ATOM | 986  | CG   | GLN | 63 | -12.859 | -4.172  | 2.070  | 1.00 | 0.00 | C |
| ATOM | 987  | CD   | GLN | 63 | -13.659 | -4.834  | 0.952  | 1.00 | 0.00 | C |
| ATOM | 988  | OE1  | GLN | 63 | -14.440 | -5.753  | 1.189  | 1.00 | 0.00 | O |
| ATOM | 989  | NE2  | GLN | 63 | -13.539 | -4.322  | -0.266 | 1.00 | 0.00 | N |
| ATOM | 990  | H    | GLN | 63 | -9.687  | -3.966  | 4.490  | 1.00 | 0.00 | H |
| ATOM | 991  | HA   | GLN | 63 | -12.565 | -4.468  | 4.784  | 1.00 | 0.00 | H |
| ATOM | 992  | HB2  | GLN | 63 | -10.915 | -5.035  | 2.272  | 1.00 | 0.00 | H |
| ATOM | 993  | HB3  | GLN | 63 | -12.255 | -6.109  | 2.737  | 1.00 | 0.00 | H |
| ATOM | 994  | HG2  | GLN | 63 | -13.621 | -3.845  | 2.770  | 1.00 | 0.00 | H |
| ATOM | 995  | HG3  | GLN | 63 | -12.318 | -3.313  | 1.680  | 1.00 | 0.00 | H |
| ATOM | 996  | HE22 | GLN | 63 | -14.111 | -4.689  | -1.017 | 1.00 | 0.00 | H |
| ATOM | 997  | HE21 | GLN | 63 | -12.937 | -3.530  | -0.433 | 1.00 | 0.00 | H |
| ATOM | 998  | N    | GLY | 64 | -11.906 | -6.276  | 6.209  | 1.00 | 0.00 | N |
| ATOM | 999  | CA   | GLY | 64 | -11.740 | -7.492  | 6.985  | 1.00 | 0.00 | C |
| ATOM | 1000 | C    | GLY | 64 | -10.756 | -7.205  | 8.083  | 1.00 | 0.00 | C |
| ATOM | 1001 | O    | GLY | 64 | -11.040 | -6.423  | 8.990  | 1.00 | 0.00 | O |
| ATOM | 1002 | H    | GLY | 64 | -12.603 | -5.599  | 6.510  | 1.00 | 0.00 | H |
| ATOM | 1003 | HA2  | GLY | 64 | -12.635 | -7.701  | 7.548  | 1.00 | 0.00 | H |
| ATOM | 1004 | HA3  | GLY | 64 | -11.473 | -8.371  | 6.379  | 1.00 | 0.00 | H |
| ATOM | 1005 | N    | ASN | 65 | -9.587  | -7.819  | 7.950  | 1.00 | 0.00 | N |
| ATOM | 1006 | CA   | ASN | 65 | -8.409  | -7.516  | 8.746  | 1.00 | 0.00 | C |
| ATOM | 1007 | C    | ASN | 65 | -7.257  | -7.118  | 7.833  | 1.00 | 0.00 | C |
| ATOM | 1008 | O    | ASN | 65 | -6.102  | -7.110  | 8.263  | 1.00 | 0.00 | O |
| ATOM | 1009 | CB   | ASN | 65 | -8.057  | -8.664  | 9.731  | 1.00 | 0.00 | C |
| ATOM | 1010 | CG   | ASN | 65 | -9.071  | -8.899  | 10.860 | 1.00 | 0.00 | C |
| ATOM | 1011 | OD1  | ASN | 65 | -10.263 | -9.071  | 10.624 | 1.00 | 0.00 | O |
| ATOM | 1012 | ND2  | ASN | 65 | -8.631  | -8.909  | 12.113 | 1.00 | 0.00 | N |
| ATOM | 1013 | H    | ASN | 65 | -9.459  | -8.401  | 7.136  | 1.00 | 0.00 | H |
| ATOM | 1014 | HA   | ASN | 65 | -8.575  | -6.582  | 9.259  | 1.00 | 0.00 | H |
| ATOM | 1015 | HB2  | ASN | 65 | -7.919  | -9.595  | 9.163  | 1.00 | 0.00 | H |
| ATOM | 1016 | HB3  | ASN | 65 | -7.114  | -8.415  | 10.224 | 1.00 | 0.00 | H |
| ATOM | 1017 | HD22 | ASN | 65 | -9.289  | -9.069  | 12.861 | 1.00 | 0.00 | H |
| ATOM | 1018 | HD21 | ASN | 65 | -7.647  | -8.772  | 12.336 | 1.00 | 0.00 | H |
| ATOM | 1019 | N    | LEU | 66 | -7.577  | -6.790  | 6.573  | 1.00 | 0.00 | N |
| ATOM | 1020 | CA   | LEU | 66 | -6.624  | -6.519  | 5.527  | 1.00 | 0.00 | C |
| ATOM | 1021 | C    | LEU | 66 | -6.810  | -5.134  | 4.937  | 1.00 | 0.00 | C |
| ATOM | 1022 | O    | LEU | 66 | -7.933  | -4.675  | 4.719  | 1.00 | 0.00 | O |
| ATOM | 1023 | CB   | LEU | 66 | -6.753  | -7.560  | 4.395  | 1.00 | 0.00 | C |
| ATOM | 1024 | CG   | LEU | 66 | -6.583  | -9.030  | 4.768  | 1.00 | 0.00 | C |
| ATOM | 1025 | CD1  | LEU | 66 | -6.919  | -9.899  | 3.552  | 1.00 | 0.00 | C |
| ATOM | 1026 | CD2  | LEU | 66 | -5.200  | -9.344  | 5.284  | 1.00 | 0.00 | C |
| ATOM | 1027 | H    | LEU | 66 | -8.551  | -6.670  | 6.318  | 1.00 | 0.00 | H |
| ATOM | 1028 | HA   | LEU | 66 | -5.641  | -6.502  | 5.970  | 1.00 | 0.00 | H |
| ATOM | 1029 | HB2  | LEU | 66 | -7.743  | -7.465  | 3.933  | 1.00 | 0.00 | H |
| ATOM | 1030 | HB3  | LEU | 66 | -5.991  | -7.346  | 3.646  | 1.00 | 0.00 | H |
| ATOM | 1031 | HG   | LEU | 66 | -7.225  | -9.270  | 5.601  | 1.00 | 0.00 | H |
| ATOM | 1032 | HD11 | LEU | 66 | -6.804  | -10.954 | 3.808  | 1.00 | 0.00 | H |
| ATOM | 1033 | HD12 | LEU | 66 | -7.950  | -9.726  | 3.220  | 1.00 | 0.00 | H |
| ATOM | 1034 | HD13 | LEU | 66 | -6.244  | -9.662  | 2.719  | 1.00 | 0.00 | H |
| ATOM | 1035 | HD21 | LEU | 66 | -5.138  | -10.407 | 5.517  | 1.00 | 0.00 | H |
| ATOM | 1036 | HD22 | LEU | 66 | -4.457  | -9.088  | 4.536  | 1.00 | 0.00 | H |
| ATOM | 1037 | HD23 | LEU | 66 | -5.030  | -8.763  | 6.189  | 1.00 | 0.00 | H |
| ATOM | 1038 | N    | SER | 67 | -5.675  | -4.525  | 4.600  | 1.00 | 0.00 | N |
| ATOM | 1039 | CA   | SER | 67 | -5.615  | -3.332  | 3.793  | 1.00 | 0.00 | C |
| ATOM | 1040 | C    | SER | 67 | -5.444  | -3.797  | 2.341  | 1.00 | 0.00 | C |
| ATOM | 1041 | O    | SER | 67 | -4.427  | -4.418  | 2.011  | 1.00 | 0.00 | O |
| ATOM | 1042 | CB   | SER | 67 | -4.412  | -2.490  | 4.239  | 1.00 | 0.00 | C |
| ATOM | 1043 | OG   | SER | 67 | -4.289  | -2.465  | 5.655  | 1.00 | 0.00 | O |
| ATOM | 1044 | H    | SER | 67 | -4.787  | -4.884  | 4.913  | 1.00 | 0.00 | H |
| ATOM | 1045 | HA   | SER | 67 | -6.523  | -2.795  | 3.925  | 1.00 | 0.00 | H |
| ATOM | 1046 | HB2  | SER | 67 | -3.496  | -2.898  | 3.814  | 1.00 | 0.00 | H |
| ATOM | 1047 | HB3  | SER | 67 | -4.555  | -1.469  | 3.875  | 1.00 | 0.00 | H |
| ATOM | 1048 | HG   | SER | 67 | -5.048  | -1.997  | 6.022  | 1.00 | 0.00 | H |
| ATOM | 1049 | N    | LEU | 68 | -6.458  | -3.568  | 1.498  | 1.00 | 0.00 | N |

|      |      |      |     |    |         |        |        |      |      |     |
|------|------|------|-----|----|---------|--------|--------|------|------|-----|
| ATOM | 1050 | CA   | LEU | 68 | -6.464  | -4.007 | 0.108  | 1.00 | 0.00 | C   |
| ATOM | 1051 | C    | LEU | 68 | -6.042  | -2.857 | -0.793 | 1.00 | 0.00 | C   |
| ATOM | 1052 | O    | LEU | 68 | -6.666  | -1.797 | -0.763 | 1.00 | 0.00 | O   |
| ATOM | 1053 | CB   | LEU | 68 | -7.862  | -4.505 | -0.331 | 1.00 | 0.00 | C   |
| ATOM | 1054 | CG   | LEU | 68 | -8.478  | -5.681 | 0.426  | 1.00 | 0.00 | C   |
| ATOM | 1055 | CD1  | LEU | 68 | -9.749  | -6.120 | -0.314 | 1.00 | 0.00 | C   |
| ATOM | 1056 | CD2  | LEU | 68 | -7.532  | -6.844 | 0.598  | 1.00 | 0.00 | C   |
| ATOM | 1057 | H    | LEU | 68 | -7.239  | -2.993 | 1.814  | 1.00 | 0.00 | H   |
| ATOM | 1058 | HA   | LEU | 68 | -5.717  | -4.762 | -0.031 | 1.00 | 0.00 | H   |
| ATOM | 1059 | HB2  | LEU | 68 | -8.584  | -3.693 | -0.253 | 1.00 | 0.00 | H   |
| ATOM | 1060 | HB3  | LEU | 68 | -7.805  | -4.836 | -1.373 | 1.00 | 0.00 | H   |
| ATOM | 1061 | HG   | LEU | 68 | -8.706  | -5.382 | 1.439  | 1.00 | 0.00 | H   |
| ATOM | 1062 | HD11 | LEU | 68 | -10.220 | -6.957 | 0.206  | 1.00 | 0.00 | H   |
| ATOM | 1063 | HD12 | LEU | 68 | -10.471 | -5.295 | -0.380 | 1.00 | 0.00 | H   |
| ATOM | 1064 | HD13 | LEU | 68 | -9.501  | -6.440 | -1.338 | 1.00 | 0.00 | H   |
| ATOM | 1065 | HD21 | LEU | 68 | -8.043  | -7.645 | 1.134  | 1.00 | 0.00 | H   |
| ATOM | 1066 | HD22 | LEU | 68 | -7.206  | -7.199 | -0.373 | 1.00 | 0.00 | H   |
| ATOM | 1067 | HD23 | LEU | 68 | -6.677  | -6.505 | 1.178  | 1.00 | 0.00 | H   |
| ATOM | 1068 | N    | LEU | 69 | -4.969  | -3.072 | -1.564 | 1.00 | 0.00 | N   |
| ATOM | 1069 | CA   | LEU | 69 | -4.410  | -2.096 | -2.480 | 1.00 | 0.00 | C   |
| ATOM | 1070 | C    | LEU | 69 | -5.266  | -1.969 | -3.729 | 1.00 | 0.00 | C   |
| ATOM | 1071 | O    | LEU | 69 | -5.546  | -2.969 | -4.395 | 1.00 | 0.00 | O   |
| ATOM | 1072 | CB   | LEU | 69 | -2.985  | -2.492 | -2.914 | 1.00 | 0.00 | C   |
| ATOM | 1073 | CG   | LEU | 69 | -1.903  | -2.151 | -1.894 | 1.00 | 0.00 | C   |
| ATOM | 1074 | CD1  | LEU | 69 | -0.581  | -2.798 | -2.336 | 1.00 | 0.00 | C   |
| ATOM | 1075 | CD2  | LEU | 69 | -1.752  | -0.666 | -1.659 | 1.00 | 0.00 | C   |
| ATOM | 1076 | H    | LEU | 69 | -4.545  | -3.997 | -1.572 | 1.00 | 0.00 | H   |
| ATOM | 1077 | HA   | LEU | 69 | -4.397  | -1.143 | -1.983 | 1.00 | 0.00 | H   |
| ATOM | 1078 | HB2  | LEU | 69 | -2.922  | -3.569 | -3.108 | 1.00 | 0.00 | H   |
| ATOM | 1079 | HB3  | LEU | 69 | -2.727  | -1.956 | -3.835 | 1.00 | 0.00 | H   |
| ATOM | 1080 | HG   | LEU | 69 | -2.216  | -2.472 | -0.911 | 1.00 | 0.00 | H   |
| ATOM | 1081 | HD11 | LEU | 69 | 0.213   | -2.574 | -1.621 | 1.00 | 0.00 | H   |
| ATOM | 1082 | HD12 | LEU | 69 | -0.688  | -3.889 | -2.414 | 1.00 | 0.00 | H   |
| ATOM | 1083 | HD13 | LEU | 69 | -0.281  | -2.414 | -3.323 | 1.00 | 0.00 | H   |
| ATOM | 1084 | HD21 | LEU | 69 | -0.967  | -0.491 | -0.920 | 1.00 | 0.00 | H   |
| ATOM | 1085 | HD22 | LEU | 69 | -1.502  | -0.164 | -2.585 | 1.00 | 0.00 | H   |
| ATOM | 1086 | HD23 | LEU | 69 | -2.698  | -0.278 | -1.272 | 1.00 | 0.00 | H   |
| ATOM | 1087 | N    | GLN | 70 | -5.614  | -0.723 | -4.057 | 1.00 | 0.00 | N   |
| ATOM | 1088 | CA   | GLN | 70 | -6.344  | -0.388 | -5.264 | 1.00 | 0.00 | C   |
| ATOM | 1089 | C    | GLN | 70 | -5.361  | -0.103 | -6.392 | 1.00 | 0.00 | C   |
| ATOM | 1090 | O    | GLN | 70 | -5.538  | -0.574 | -7.517 | 1.00 | 0.00 | O   |
| ATOM | 1091 | CB   | GLN | 70 | -7.266  | 0.831  | -5.037 | 1.00 | 0.00 | C   |
| ATOM | 1092 | CG   | GLN | 70 | -8.243  | 0.676  | -3.854 | 1.00 | 0.00 | C   |
| ATOM | 1093 | CD   | GLN | 70 | -9.191  | -0.528 | -3.932 | 1.00 | 0.00 | C   |
| ATOM | 1094 | OE1  | GLN | 70 | -8.775  | -1.678 | -3.907 | 1.00 | 0.00 | O   |
| ATOM | 1095 | NE2  | GLN | 70 | -10.496 | -0.290 | -3.994 | 1.00 | 0.00 | N   |
| ATOM | 1096 | H    | GLN | 70 | -5.289  | 0.046  | -3.474 | 1.00 | 0.00 | H   |
| ATOM | 1097 | HA   | GLN | 70 | -6.911  | -1.240 | -5.547 | 1.00 | 0.00 | H   |
| ATOM | 1098 | HB2  | GLN | 70 | -6.664  | 1.738  | -4.873 | 1.00 | 0.00 | H   |
| ATOM | 1099 | HB3  | GLN | 70 | -7.870  | 0.982  | -5.941 | 1.00 | 0.00 | H   |
| ATOM | 1100 | HG2  | GLN | 70 | -7.640  | 0.596  | -2.943 | 1.00 | 0.00 | H   |
| ATOM | 1101 | HG3  | GLN | 70 | -8.856  | 1.574  | -3.798 | 1.00 | 0.00 | H   |
| ATOM | 1102 | HE22 | GLN | 70 | -11.118 | -1.084 | -4.001 | 1.00 | 0.00 | H   |
| ATOM | 1103 | HE21 | GLN | 70 | -10.870 | 0.645  | -3.964 | 1.00 | 0.00 | H   |
| ATOM | 1104 | N    | ASP | 71 | -4.294  | 0.621  | -6.071 | 1.00 | 0.00 | N   |
| ATOM | 1105 | CA   | ASP | 71 | -3.242  | 1.004  | -6.985 | 1.00 | 0.00 | C   |
| ATOM | 1106 | C    | ASP | 71 | -2.005  | 1.343  | -6.169 | 1.00 | 0.00 | C   |
| ATOM | 1107 | O    | ASP | 71 | -2.088  | 1.645  | -4.974 | 1.00 | 0.00 | O   |
| ATOM | 1108 | CB   | ASP | 71 | -3.708  | 2.134  | -7.944 | 1.00 | 0.00 | C   |
| ATOM | 1109 | CG   | ASP | 71 | -4.183  | 3.446  | -7.321 | 1.00 | 0.00 | C   |
| ATOM | 1110 | OD1  | ASP | 71 | -3.451  | 4.024  | -6.494 | 1.00 | 0.00 | O   |
| ATOM | 1111 | OD2  | ASP | 71 | -5.283  | 3.911  | -7.696 | 1.00 | 0.00 | O1- |
| ATOM | 1112 | H    | ASP | 71 | -4.171  | 0.949  | -5.120 | 1.00 | 0.00 | H   |
| ATOM | 1113 | HA   | ASP | 71 | -2.953  | 0.108  | -7.549 | 1.00 | 0.00 | H   |
| ATOM | 1114 | HB2  | ASP | 71 | -2.868  | 2.407  | -8.578 | 1.00 | 0.00 | H   |
| ATOM | 1115 | HB3  | ASP | 71 | -4.525  | 1.756  | -8.564 | 1.00 | 0.00 | H   |

|      |      |      |     |    |        |        |         |      |      |     |
|------|------|------|-----|----|--------|--------|---------|------|------|-----|
| ATOM | 1116 | N    | ILE | 72 | -0.856 | 1.236  | -6.831  | 1.00 | 0.00 | N   |
| ATOM | 1117 | CA   | ILE | 72 | 0.451  | 1.579  | -6.319  | 1.00 | 0.00 | C   |
| ATOM | 1118 | C    | ILE | 72 | 1.360  | 1.889  | -7.504  | 1.00 | 0.00 | C   |
| ATOM | 1119 | O    | ILE | 72 | 1.313  | 1.219  | -8.542  | 1.00 | 0.00 | O   |
| ATOM | 1120 | CB   | ILE | 72 | 0.974  | 0.495  | -5.331  | 1.00 | 0.00 | C   |
| ATOM | 1121 | CG2  | ILE | 72 | 1.118  | -0.865 | -6.047  | 1.00 | 0.00 | C   |
| ATOM | 1122 | CG1  | ILE | 72 | 2.285  | 0.920  | -4.673  | 1.00 | 0.00 | C   |
| ATOM | 1123 | CD1  | ILE | 72 | 2.705  | 0.058  | -3.500  | 1.00 | 0.00 | C   |
| ATOM | 1124 | H    | ILE | 72 | -0.880 | 0.943  | -7.801  | 1.00 | 0.00 | H   |
| ATOM | 1125 | HA   | ILE | 72 | 0.366  | 2.542  | -5.824  | 1.00 | 0.00 | H   |
| ATOM | 1126 | HB   | ILE | 72 | 0.301  | 0.403  | -4.476  | 1.00 | 0.00 | H   |
| ATOM | 1127 | HG21 | ILE | 72 | 1.484  | -1.631 | -5.358  | 1.00 | 0.00 | H   |
| ATOM | 1128 | HG22 | ILE | 72 | 0.154  | -1.198 | -6.458  | 1.00 | 0.00 | H   |
| ATOM | 1129 | HG23 | ILE | 72 | 1.831  | -0.777 | -6.880  | 1.00 | 0.00 | H   |
| ATOM | 1130 | HG12 | ILE | 72 | 3.081  | 0.886  | -5.403  | 1.00 | 0.00 | H   |
| ATOM | 1131 | HG13 | ILE | 72 | 2.160  | 1.933  | -4.297  | 1.00 | 0.00 | H   |
| ATOM | 1132 | HD11 | ILE | 72 | 3.639  | 0.447  | -3.090  | 1.00 | 0.00 | H   |
| ATOM | 1133 | HD12 | ILE | 72 | 1.936  | 0.079  | -2.729  | 1.00 | 0.00 | H   |
| ATOM | 1134 | HD13 | ILE | 72 | 2.857  | -0.968 | -3.835  | 1.00 | 0.00 | H   |
| ATOM | 1135 | N    | LYS | 73 | 2.184  | 2.919  | -7.335  | 1.00 | 0.00 | N   |
| ATOM | 1136 | CA   | LYS | 73 | 3.194  | 3.345  | -8.273  | 1.00 | 0.00 | C   |
| ATOM | 1137 | C    | LYS | 73 | 4.242  | 4.165  | -7.542  | 1.00 | 0.00 | C   |
| ATOM | 1138 | O    | LYS | 73 | 3.958  | 4.735  | -6.483  | 1.00 | 0.00 | O   |
| ATOM | 1139 | CB   | LYS | 73 | 2.525  | 4.057  | -9.472  | 1.00 | 0.00 | C   |
| ATOM | 1140 | CG   | LYS | 73 | 1.798  | 5.363  | -9.168  | 1.00 | 0.00 | C   |
| ATOM | 1141 | CD   | LYS | 73 | 1.572  | 6.169  | -10.453 | 1.00 | 0.00 | C   |
| ATOM | 1142 | CE   | LYS | 73 | 0.842  | 7.477  | -10.151 | 1.00 | 0.00 | C   |
| ATOM | 1143 | NZ   | LYS | 73 | 0.679  | 8.391  | -11.290 | 1.00 | 0.00 | N1+ |
| ATOM | 1144 | H    | LYS | 73 | 2.128  | 3.461  | -6.476  | 1.00 | 0.00 | H   |
| ATOM | 1145 | HA   | LYS | 73 | 3.759  | 2.471  | -8.595  | 1.00 | 0.00 | H   |
| ATOM | 1146 | HB2  | LYS | 73 | 3.282  | 4.298  | -10.212 | 1.00 | 0.00 | H   |
| ATOM | 1147 | HB3  | LYS | 73 | 1.779  | 3.392  | -9.915  | 1.00 | 0.00 | H   |
| ATOM | 1148 | HG2  | LYS | 73 | 0.835  | 5.133  | -8.704  | 1.00 | 0.00 | H   |
| ATOM | 1149 | HG3  | LYS | 73 | 2.401  | 5.946  | -8.468  | 1.00 | 0.00 | H   |
| ATOM | 1150 | HD2  | LYS | 73 | 2.549  | 6.372  | -10.898 | 1.00 | 0.00 | H   |
| ATOM | 1151 | HD3  | LYS | 73 | 0.987  | 5.552  | -11.139 | 1.00 | 0.00 | H   |
| ATOM | 1152 | HE2  | LYS | 73 | -0.128 | 7.228  | -9.731  | 1.00 | 0.00 | H   |
| ATOM | 1153 | HE3  | LYS | 73 | 1.431  | 8.034  | -9.434  | 1.00 | 0.00 | H   |
| ATOM | 1154 | HZ1  | LYS | 73 | -0.071 | 9.043  | -11.037 | 1.00 | 0.00 | H   |
| ATOM | 1155 | HZ2  | LYS | 73 | 1.550  | 8.893  | -11.416 | 1.00 | 0.00 | H   |
| ATOM | 1156 | HZ3  | LYS | 73 | 0.408  | 7.918  | -12.133 | 1.00 | 0.00 | H   |
| ATOM | 1157 | N    | VAL | 74 | 5.441  | 4.257  | -8.129  | 1.00 | 0.00 | N   |
| ATOM | 1158 | CA   | VAL | 74 | 6.468  | 5.186  | -7.694  | 1.00 | 0.00 | C   |
| ATOM | 1159 | C    | VAL | 74 | 5.942  | 6.625  | -7.827  | 1.00 | 0.00 | C   |
| ATOM | 1160 | O    | VAL | 74 | 5.309  | 6.987  | -8.829  | 1.00 | 0.00 | O   |
| ATOM | 1161 | CB   | VAL | 74 | 7.804  | 4.970  | -8.455  | 1.00 | 0.00 | C   |
| ATOM | 1162 | CG1  | VAL | 74 | 8.842  | 6.004  | -8.012  | 1.00 | 0.00 | C   |
| ATOM | 1163 | CG2  | VAL | 74 | 8.386  | 3.580  | -8.238  | 1.00 | 0.00 | C   |
| ATOM | 1164 | H    | VAL | 74 | 5.621  | 3.749  | -8.982  | 1.00 | 0.00 | H   |
| ATOM | 1165 | HA   | VAL | 74 | 6.630  | 4.993  | -6.636  | 1.00 | 0.00 | H   |
| ATOM | 1166 | HB   | VAL | 74 | 7.662  | 5.041  | -9.534  | 1.00 | 0.00 | H   |
| ATOM | 1167 | HG11 | VAL | 74 | 9.785  | 5.869  | -8.546  | 1.00 | 0.00 | H   |
| ATOM | 1168 | HG12 | VAL | 74 | 8.460  | 7.008  | -8.209  | 1.00 | 0.00 | H   |
| ATOM | 1169 | HG13 | VAL | 74 | 9.029  | 5.903  | -6.936  | 1.00 | 0.00 | H   |
| ATOM | 1170 | HG21 | VAL | 74 | 9.340  | 3.470  | -8.776  | 1.00 | 0.00 | H   |
| ATOM | 1171 | HG22 | VAL | 74 | 8.568  | 3.413  | -7.174  | 1.00 | 0.00 | H   |
| ATOM | 1172 | HG23 | VAL | 74 | 7.689  | 2.828  | -8.606  | 1.00 | 0.00 | H   |
| ATOM | 1173 | N    | SER | 75 | 6.203  | 7.423  | -6.786  | 1.00 | 0.00 | N   |
| ATOM | 1174 | CA   | SER | 75 | 5.757  | 8.796  | -6.698  | 1.00 | 0.00 | C   |
| ATOM | 1175 | C    | SER | 75 | 6.835  | 9.765  | -7.137  | 1.00 | 0.00 | C   |
| ATOM | 1176 | O    | SER | 75 | 6.554  | 10.689 | -7.906  | 1.00 | 0.00 | O   |
| ATOM | 1177 | CB   | SER | 75 | 5.291  | 9.104  | -5.261  | 1.00 | 0.00 | C   |
| ATOM | 1178 | OG   | SER | 75 | 4.637  | 10.344 | -5.079  | 1.00 | 0.00 | O   |
| ATOM | 1179 | H    | SER | 75 | 6.784  | 7.044  | -6.037  | 1.00 | 0.00 | H   |
| ATOM | 1180 | HA   | SER | 75 | 4.993  | 8.885  | -7.420  | 1.00 | 0.00 | H   |
| ATOM | 1181 | HB2  | SER | 75 | 4.614  | 8.322  | -4.924  | 1.00 | 0.00 | H   |

|        |      |      |     |     |        |        |        |      |      |      |
|--------|------|------|-----|-----|--------|--------|--------|------|------|------|
| ATOM   | 1182 | HB3  | SER | 75  | 6.161  | 9.142  | -4.607 | 1.00 | 0.00 | H    |
| ATOM   | 1183 | HG   | SER | 75  | 3.901  | 10.413 | -5.676 | 1.00 | 0.00 | H    |
| ATOM   | 1184 | N    | GLN | 76  | 8.055  | 9.538  | -6.658 | 1.00 | 0.00 | N    |
| ATOM   | 1185 | CA   | GLN | 76  | 9.214  | 10.321 | -6.982 | 1.00 | 0.00 | C    |
| ATOM   | 1186 | C    | GLN | 76  | 10.465 | 9.489  | -6.642 | 1.00 | 0.00 | C    |
| ATOM   | 1187 | O    | GLN | 76  | 10.346 | 8.507  | -5.912 | 1.00 | 0.00 | O    |
| ATOM   | 1188 | CB   | GLN | 76  | 9.137  | 11.697 | -6.288 | 1.00 | 0.00 | C    |
| ATOM   | 1189 | CG   | GLN | 76  | 10.320 | 12.575 | -6.710 | 1.00 | 0.00 | C    |
| ATOM   | 1190 | CD   | GLN | 76  | 10.321 | 13.951 | -6.040 | 1.00 | 0.00 | C    |
| ATOM   | 1191 | OE1  | GLN | 76  | 9.701  | 14.158 | -5.000 | 1.00 | 0.00 | O    |
| ATOM   | 1192 | NE2  | GLN | 76  | 11.011 | 14.923 | -6.622 | 1.00 | 0.00 | N    |
| ATOM   | 1193 | H    | GLN | 76  | 8.261  | 8.702  | -6.122 | 1.00 | 0.00 | H    |
| ATOM   | 1194 | HA   | GLN | 76  | 9.149  | 10.488 | -8.048 | 1.00 | 0.00 | H    |
| ATOM   | 1195 | HB2  | GLN | 76  | 8.194  | 12.203 | -6.553 | 1.00 | 0.00 | H    |
| ATOM   | 1196 | HB3  | GLN | 76  | 9.151  | 11.555 | -5.200 | 1.00 | 0.00 | H    |
| ATOM   | 1197 | HG2  | GLN | 76  | 11.237 | 12.025 | -6.448 | 1.00 | 0.00 | H    |
| ATOM   | 1198 | HG3  | GLN | 76  | 10.280 | 12.673 | -7.802 | 1.00 | 0.00 | H    |
| ATOM   | 1199 | HE22 | GLN | 76  | 10.988 | 15.834 | -6.189 | 1.00 | 0.00 | H    |
| ATOM   | 1200 | HE21 | GLN | 76  | 11.536 | 14.766 | -7.471 | 1.00 | 0.00 | H    |
| ATOM   | 1201 | N    | NMA | 76A | 11.647 | 9.935  | -7.096 | 1.00 | 0.00 | N    |
| ATOM   | 1202 | CA   | NMA | 76A | 12.960 | 9.624  | -6.545 | 1.00 | 0.00 | C    |
| ATOM   | 1203 | H    | NMA | 76A | 11.615 | 10.676 | -7.778 | 1.00 | 0.00 | H    |
| ATOM   | 1204 | 1HA  | NMA | 76A | 12.732 | 8.691  | -6.042 | 1.00 | 0.00 | H    |
| ATOM   | 1205 | 2HA  | NMA | 76A | 13.560 | 9.496  | -7.449 | 1.00 | 0.00 | H    |
| ATOM   | 1206 | 3HA  | NMA | 76A | 13.519 | 10.319 | -5.835 | 1.00 | 0.00 | H    |
| TER    | 1207 |      | NMA | 76A |        |        |        |      |      |      |
| HETATM | 1208 | CU   | CU  | 77  | -1.928 | 2.763  | 9.180  | 1.00 | 0.00 | Cu1+ |
| END    |      |      |     |     |        |        |        |      |      |      |

## Cu(I) Calculation File 2VB2 : Gaussian09 Format

```
%chk=cusf-mp2.chk  
%mem=24GB  
%nprocshared=12  
#p mp2/aug-cc-pvdz nosymm maxdisk=400GB counterpoise=2
```

cusf-gb3

1 1 1 1 0 1

|                |             |            |             |
|----------------|-------------|------------|-------------|
| Cu(Fragment=1) | 7.80699800  | 5.17999900 | 17.58599900 |
| C(Fragment=1)  | 10.28300000 | 7.09200000 | 14.84300000 |
| N(Fragment=1)  | 9.79900000  | 8.07000000 | 15.68400000 |
| H(Fragment=1)  | 10.00486400 | 9.05688900 | 15.59190900 |
| C(Fragment=1)  | 9.10399900  | 7.51000000 | 16.66400000 |
| H(Fragment=1)  | 8.62871000  | 8.04797800 | 17.46931100 |
| N(Fragment=1)  | 9.07200100  | 6.20300000 | 16.46200000 |
| C(Fragment=1)  | 9.79700000  | 5.91800000 | 15.32300000 |
| H(Fragment=1)  | 9.90512800  | 4.91917300 | 14.93329600 |
| C(Fragment=1)  | 9.79300000  | 6.08800000 | 20.09000000 |
| H(Fragment=1)  | 10.05379300 | 5.99944400 | 21.14766900 |
| H(Fragment=1)  | 9.76344200  | 7.14242300 | 19.80127800 |
| S(Fragment=1)  | 8.18000100  | 5.28000000 | 19.79900000 |
| C(Fragment=1)  | 7.17900200  | 6.30000000 | 20.85200100 |
| H(Fragment=1)  | 6.14945000  | 5.94097300 | 20.79952100 |
| H(Fragment=1)  | 7.52902300  | 6.21175500 | 21.88500200 |
| H(Fragment=1)  | 7.18976600  | 7.34699300 | 20.54338100 |
| C(Fragment=1)  | 9.30600000  | 2.64600100 | 16.87200100 |
| H(Fragment=1)  | 9.58000700  | 2.67834600 | 17.93139100 |
| H(Fragment=1)  | 9.96115400  | 3.32199200 | 16.32201300 |
| S(Fragment=1)  | 7.60399500  | 3.15400300 | 16.62999900 |
| C(Fragment=1)  | 6.79701000  | 1.98998900 | 17.72200400 |
| H(Fragment=1)  | 5.73441200  | 2.24297300 | 17.74535300 |
| H(Fragment=1)  | 6.90994900  | 0.96978200 | 17.34395000 |
| H(Fragment=1)  | 7.19939100  | 2.05774200 | 18.73714600 |
| H(Fragment=1)  | 10.88664000 | 7.33303000 | 13.98139100 |
| C(Fragment=2)  | 4.96200100  | 8.08699900 | 19.02100100 |
| C(Fragment=2)  | 3.97800000  | 7.92200000 | 19.96000000 |
| H(Fragment=2)  | 3.69872200  | 8.56105700 | 20.78671300 |
| N(Fragment=2)  | 3.28299800  | 6.76100000 | 19.71899900 |
| H(Fragment=2)  | 2.48455000  | 6.44060500 | 20.24630100 |
| C(Fragment=2)  | 3.80900000  | 6.15199900 | 18.61500000 |
| C(Fragment=2)  | 3.43599900  | 4.95600200 | 17.97899800 |
| H(Fragment=2)  | 2.59952700  | 4.36618300 | 18.34437300 |
| C(Fragment=2)  | 4.14999500  | 4.57400700 | 16.87899700 |
| H(Fragment=2)  | 3.86766800  | 3.67152000 | 16.34308000 |
| C(Fragment=2)  | 5.21500400  | 5.35399900 | 16.38100400 |
| H(Fragment=2)  | 5.70107900  | 5.06413200 | 15.45536600 |
| C(Fragment=2)  | 5.59199900  | 6.55600200 | 17.01799900 |
| H(Fragment=2)  | 6.33402200  | 7.20589200 | 16.56347600 |
| C(Fragment=2)  | 4.87599900  | 6.96100100 | 18.15199900 |
| H(Fragment=2)  | 5.64010500  | 8.92662900 | 18.95352900 |
| H(Fragment=1)  | 10.54493600 | 5.57048700 | 19.49054400 |
| H(Fragment=1)  | 9.46504600  | 1.63081400 | 16.49420800 |

## Ag(I) Calculation File 2QCP : Gaussian09 Format

```
%chk=t_gyg.chk
%mem=12GB
%nprocshared=8
#MP2/genECP NoSymm MaxDisk=400GB counterpoise=2

cusf-gb3

1 1 0 1 1 1
C(Fragment=2) 10.71400000 7.33600000 14.76900000
H(Fragment=2) 11.43631300 7.52304900 13.98950800
C(Fragment=2) 10.10200100 6.19800000 15.19900100
H(Fragment=2) 10.19663600 5.19159800 14.82039700
N(Fragment=2) 9.24999600 6.50800100 16.23599800
C(Fragment=2) 9.36899700 7.81500000 16.45300000
H(Fragment=2) 8.83999500 8.38642900 17.20084000
N(Fragment=2) 10.24700000 8.34500000 15.59200000
H(Fragment=2) 10.50971000 9.31995300 15.53339800
C(Fragment=1) 5.21899800 8.26699700 18.96500300
C(Fragment=1) 4.26597000 8.06201700 19.92799400
C(Fragment=1) 5.04700000 7.22500000 18.02400000
C(Fragment=1) 3.96699700 6.43700100 18.44599800
C(Fragment=1) 5.68800500 6.91800200 16.81199900
N(Fragment=1) 3.52500600 6.95499700 19.62900200
C(Fragment=1) 3.51599900 5.35199900 17.71600000
C(Fragment=1) 5.25299600 5.85200100 16.10899600
C(Fragment=1) 4.13600000 5.09800100 16.52800200
H(Fragment=1) 3.79237900 4.28072800 15.90125800
H(Fragment=1) 5.93161200 9.07960800 18.93747600
H(Fragment=1) 4.04895300 8.63956300 20.81654500
H(Fragment=1) 6.47138200 7.56527300 16.42558100
H(Fragment=1) 2.72520400 6.63182200 20.15266200
H(Fragment=1) 2.65800600 4.76846200 18.04139000
H(Fragment=1) 5.69817600 5.61655100 15.14584200
C(Fragment=2) 10.20000000 4.98799900 19.92100200
S(Fragment=2) 8.39199900 4.84600100 19.73199900
C(Fragment=2) 8.07003000 6.46698800 20.33800300
H(Fragment=2) 8.63208000 7.22020000 19.77625600
H(Fragment=2) 10.66890500 4.05224400 19.60664300
H(Fragment=2) 8.34554800 6.54331900 21.39561100
H(Fragment=2) 10.43180800 5.16240300 20.97503000
H(Fragment=2) 7.00565200 6.69850100 20.24512900
H(Fragment=2) 10.58357100 5.80767300 19.30803000
C(Fragment=2) 7.97200000 1.71800000 16.32500000
S(Fragment=2) 6.72000000 3.01200000 16.60299900
C(Fragment=2) 5.95200000 2.40700000 18.10800000
H(Fragment=2) 5.15978700 3.11174300 18.36994300
H(Fragment=2) 8.50972600 1.97563300 15.40924300
H(Fragment=2) 6.66626400 2.34568000 18.93386000
H(Fragment=2) 7.48134700 0.75097200 16.18387500
H(Fragment=2) 5.50540300 1.42350700 17.93315800
H(Fragment=2) 8.67949100 1.65503400 17.15663000
Ag(Fragment=2) 7.84600500 5.19399700 17.36800400

C S H N O
aug-cc-pvdz
****
```

Ag 0  
LANL2DZ  
\*\*\*

Ag 0  
LANL2DZ

## Ag(I) Calculation File 2VB3 : Gaussian09 Format

```
%chk=2vb3_b3lyp_hyd_opt.chk
%mem=12GB
%nprocshared=8
#p mp2/genecp nosymm maxdisk=100GB counterpoise=2

test

1 1 0 1 1 1
C(Fragment=2) 7.50900000 -14.19900000 -9.92200000
N(Fragment=2) 8.27800000 -15.04100000 -9.15300000
C(Fragment=2) 6.22700000 -14.59600000 -9.74800000
C(Fragment=2) 7.49900000 -15.91600000 -8.54700000
N(Fragment=2) 6.24600000 -15.66000000 -8.88100000
C(Fragment=1) 6.90500000 -18.61700200 -4.62600400
C(Fragment=1) 6.38099700 -19.68999800 -3.99100400
C(Fragment=1) 5.93301300 -17.57499000 -4.52497200
N(Fragment=1) 5.15100700 -19.38199700 -3.47298300
C(Fragment=1) 4.84697700 -18.09001700 -3.79604800
C(Fragment=1) 5.87699800 -16.25300100 -4.97100400
C(Fragment=1) 3.71801100 -17.33199200 -3.50397900
C(Fragment=1) 4.75599800 -15.50700100 -4.68200300
C(Fragment=1) 3.69099500 -16.04699900 -3.95400800
C(Fragment=2) 6.45400000 -18.96900000 -9.59700000
S(Fragment=2) 5.06000000 -19.28900000 -8.47500000
C(Fragment=2) 5.36600000 -21.02000000 -8.12700000
C(Fragment=2) 1.46800100 -16.95399900 -8.86600000
S(Fragment=2) 2.05799500 -16.81000100 -7.16500500
C(Fragment=2) 1.48300700 -15.17600200 -6.77599100
Ag(Fragment=2) 4.72400000 -16.91600000 -7.65999800
H(Fragment=2) 5.31181100 -14.20481000 -10.16227900
H(Fragment=2) 7.84122400 -16.69367800 -7.87915100
H(Fragment=1) 6.80607700 -20.67093600 -3.83016000
H(Fragment=1) 4.56955600 -20.00623200 -2.93546200
H(Fragment=1) 6.71997800 -15.80302600 -5.49175700
H(Fragment=1) 4.70978100 -14.46769700 -4.99657500
H(Fragment=1) 2.89712500 -17.74746200 -2.92717000
H(Fragment=1) 2.84050900 -15.41681300 -3.71074300
H(Fragment=2) 7.40556900 -19.03427900 -9.06321100
H(Fragment=2) 6.32950200 -17.97067500 -10.01690800
H(Fragment=2) 6.33575400 -21.15763700 -7.64397100
H(Fragment=2) 5.32144600 -21.58637600 -9.05918700
H(Fragment=2) 0.37594700 -16.94358000 -8.88824100
H(Fragment=2) 1.82170800 -17.91005800 -9.25775800
H(Fragment=2) 1.84952000 -14.92598600 -5.77908600
H(Fragment=2) 0.39071500 -15.15362900 -6.76616200
H(Fragment=2) 1.85852700 -14.43577000 -7.48694100
H(Fragment=2) 4.58066800 -21.37220600 -7.45626600
H(Fragment=2) 6.44199400 -19.69987500 -10.40924900
H(Fragment=2) 1.85624300 -16.14291100 -9.48702300
H(Fragment=2) 7.95361100 -13.41143300 -10.50977700
H(Fragment=2) 9.28591200 -14.99203500 -9.08356900
H(Fragment=1) 7.87485900 -18.56634100 -5.09984100

C S H N O
aug-cc-pvdz
****
```

Ag 0  
LANL2DZ  
\*\*\*

Ag 0  
LANL2DZ

## Cu(I) Calculation File W44M from QM/MM : Gaussian09 Format

```
%nprocshared=8
%mem=12GB
%chk=metal_centre_lacvp3p_p_hopt_b3lyp.chk
#p MP2/aug-cc-pvdz nosymm maxdisk=400GB counterpoise=2
```

Title Card Required

```
1 1 0 1 1 1
C(Fragment=2) 0.95299800 4.35500200 6.41000100
N(Fragment=2) 0.49700700 5.47499700 7.04600600
C(Fragment=2) -0.35401500 5.10400400 8.01499000
N(Fragment=2) -0.53397900 3.79399900 8.01801600
C(Fragment=2) 0.27999200 3.32199700 7.00799100
H(Fragment=2) 0.79532900 6.42397100 6.86219300
H(Fragment=2) -0.84157300 5.81122300 8.66986800
H(Fragment=2) 0.32499300 2.27475500 6.75680900
C(Fragment=1) -4.14899900 4.89100000 10.38300000
S(Fragment=1) -4.08900100 3.79100000 8.92399900
C(Fragment=1) -5.37200000 2.60300000 9.37900000
H(Fragment=1) -4.06122500 4.31669000 11.30513400
H(Fragment=1) -5.08416800 5.45790500 10.38668900
H(Fragment=1) -5.44230900 1.87178900 8.56948800
H(Fragment=1) -5.13151300 2.08858300 10.31365100
H(Fragment=1) -6.33689900 3.10920100 9.47167100
C(Fragment=2) 0.27000000 3.29200000 11.53900000
S(Fragment=2) -1.33700000 2.41400000 11.49600000
C(Fragment=2) -2.22600000 3.14500000 12.88400000
H(Fragment=2) 0.79172100 3.08526300 12.47721300
H(Fragment=2) 0.13336600 4.36947600 11.41621700
H(Fragment=2) -3.22254700 2.69664100 12.90536000
H(Fragment=2) -1.71939600 2.89809900 13.82140700
H(Fragment=2) -2.31499600 4.23070500 12.79436900
C(Fragment=2) -0.22800000 -0.10099900 8.45500100
S(Fragment=2) -1.92600100 0.55499900 8.33299800
C(Fragment=2) -2.79100000 -0.59800000 9.42900100
H(Fragment=2) 0.13230800 -0.06967200 9.48712000
H(Fragment=2) 0.42186200 0.50984300 7.82827600
H(Fragment=2) -3.85251000 -0.34031400 9.40549800
H(Fragment=2) -2.67212100 -1.62023600 9.05997200
H(Fragment=2) -2.42148400 -0.52462200 10.45576700
Cu(Fragment=2) -1.94400200 2.78700100 9.18699800
H(Fragment=1) -3.31331600 5.59043600 10.30626800
H(Fragment=2) -0.20626600 -1.12981600 8.08579500
H(Fragment=2) 0.85801200 2.90629100 10.70426400
H(Fragment=2) 1.65542200 4.38794000 5.59229400
```

## AMBER force field files

### Cusf.prep

1 1 2

1FWJ fragment set created by MTK++/MCPB

HISTIDINE DELTAH

H36 INT 1

CORR OMIT DU BEG

0.00000

```
1 DUMM DU M 0 -1 -2 0.000 .0 .0 .00000
2 DUMM DU M 1 0 -1 1.449 .0 .0 .00000
3 DUMM DU M 2 1 0 1.522 111.1 .0 .00000
4 N N M 3 2 1 1.335 116.600 180.000 -0.41570
5 H H E 4 3 2 1.010 119.800 0.000 0.27190
6 CA CT M 4 3 2 1.449 121.900 180.000 0.01880
7 HA H1 E 6 4 3 1.090 109.500 300.000 0.08810
8 CB CT 3 6 4 3 1.525 111.100 60.000 0.07583
9 HB2 HC E 8 6 4 1.090 109.500 300.000 0.03086
10 HB3 HC E 8 6 4 1.090 109.500 60.000 0.03086
11 CG CC S 8 6 4 1.510 115.000 180.000 -0.03950
12 ND1 NA B 11 8 6 1.390 122.000 180.000 -0.08946
13 HD1 H E 12 11 8 1.010 126.000 0.000 0.31650
14 CE1 CR B 12 11 8 1.320 108.000 180.000 -0.14057
15 HE1 H5 E 14 12 11 1.090 120.000 180.000 0.24139
16 NE2 NU S 14 12 11 1.310 109.000 0.000 -0.31035
17 CD2 CV S 16 14 12 1.360 110.000 0.000 -0.15026
18 HD2 H4 E 17 16 14 1.090 120.000 180.000 0.22812
19 C C M 6 4 3 1.522 111.100 180.000 0.59730
20 O O E 19 6 4 1.229 120.500 0.000 -0.56790
```

LOOP

CG CD2

IMPROPER

-M CA N H

CA +M C O

CG CE1 ND1 HD1

CG NE2 CD2 HD2

ND1 NE2 CE1 HE1

ND1 CD2 CG CB

DONE

METHIONINE

M47 INT 1

CORR OMIT DU BEG

0.00000

```
1 DUMM DU M 0 -1 -2 0.000 .0 .0 .00000
2 DUMM DU M 1 0 -1 1.449 .0 .0 .00000
3 DUMM DU M 2 1 0 1.522 111.1 .0 .00000
4 N N M 3 2 1 1.335 116.600 180.000 -0.41570
5 H H E 4 3 2 1.010 119.800 0.000 0.27190
6 CA CT M 4 3 2 1.449 121.900 180.000 -0.02370
7 HA H1 E 6 4 3 1.090 109.500 300.000 0.08800
8 CB CT 3 6 4 3 1.525 111.100 60.000 0.25244
9 HB2 HC E 8 6 4 1.090 109.500 300.000 -0.02415
10 HB3 HC E 8 6 4 1.090 109.500 60.000 -0.02415
11 CG CT 3 8 6 4 1.525 109.470 180.000 -0.05816
12 HG2 H1 E 11 8 6 1.090 109.500 300.000 0.06575
```

|    |     |    |   |    |    |    |       |         |         |          |
|----|-----|----|---|----|----|----|-------|---------|---------|----------|
| 13 | HG3 | H1 | E | 11 | 8  | 6  | 1.090 | 109.500 | 60.000  | 0.06575  |
| 14 | SD  | SV | S | 11 | 8  | 6  | 1.810 | 110.000 | 180.000 | -0.21913 |
| 15 | CE  | CT | 3 | 14 | 11 | 8  | 1.780 | 100.000 | 180.000 | -0.29002 |
| 16 | HE1 | H1 | E | 15 | 14 | 11 | 1.090 | 109.500 | 60.000  | 0.14567  |
| 17 | HE2 | H1 | E | 15 | 14 | 11 | 1.090 | 109.500 | 180.000 | 0.14567  |
| 18 | HE3 | H1 | E | 15 | 14 | 11 | 1.090 | 109.500 | 300.000 | 0.14567  |
| 19 | C   | C  | M | 6  | 4  | 3  | 1.522 | 111.100 | 180.000 | 0.59730  |
| 20 | O   | O  | E | 19 | 6  | 4  | 1.229 | 120.500 | 0.000   | -0.56790 |

IMPROPER

-M CA N H

CA +M C O

DONE

METHIONINE

M49 INT 1

CORR OMIT DU BEG

0.00000

|    |      |    |   |    |    |    |       |         |         |          |
|----|------|----|---|----|----|----|-------|---------|---------|----------|
| 1  | DUMM | DU | M | 0  | -1 | -2 | 0.000 | .0      | .0      | .00000   |
| 2  | DUMM | DU | M | 1  | 0  | -1 | 1.449 | .0      | .0      | .00000   |
| 3  | DUMM | DU | M | 2  | 1  | 0  | 1.522 | 111.1   | .0      | .00000   |
| 4  | N    | N  | M | 3  | 2  | 1  | 1.335 | 116.600 | 180.000 | -0.41570 |
| 5  | H    | H  | E | 4  | 3  | 2  | 1.010 | 119.800 | 0.000   | 0.27190  |
| 6  | CA   | CT | M | 4  | 3  | 2  | 1.449 | 121.900 | 180.000 | -0.02370 |
| 7  | HA   | H1 | E | 6  | 4  | 3  | 1.090 | 109.500 | 300.000 | 0.08800  |
| 8  | CB   | CT | 3 | 6  | 4  | 3  | 1.525 | 111.100 | 60.000  | 0.41857  |
| 9  | HB2  | HC | E | 8  | 6  | 4  | 1.090 | 109.500 | 300.000 | -0.06067 |
| 10 | HB3  | HC | E | 8  | 6  | 4  | 1.090 | 109.500 | 60.000  | -0.06067 |
| 11 | CG   | CT | 3 | 8  | 6  | 4  | 1.525 | 109.470 | 180.000 | -0.20683 |
| 12 | HG2  | H1 | E | 11 | 8  | 6  | 1.090 | 109.500 | 300.000 | 0.06685  |
| 13 | HG3  | H1 | E | 11 | 8  | 6  | 1.090 | 109.500 | 60.000  | 0.06685  |
| 14 | SD   | SW | S | 11 | 8  | 6  | 1.810 | 110.000 | 180.000 | -0.30243 |
| 15 | CE   | CT | 3 | 14 | 11 | 8  | 1.780 | 100.000 | 180.000 | -0.02241 |
| 16 | HE1  | H1 | E | 15 | 14 | 11 | 1.090 | 109.500 | 60.000  | 0.08468  |
| 17 | HE2  | H1 | E | 15 | 14 | 11 | 1.090 | 109.500 | 180.000 | 0.08468  |
| 18 | HE3  | H1 | E | 15 | 14 | 11 | 1.090 | 109.500 | 300.000 | 0.08468  |
| 19 | C    | C  | M | 6  | 4  | 3  | 1.522 | 111.100 | 180.000 | 0.59730  |
| 20 | O    | O  | E | 19 | 6  | 4  | 1.229 | 120.500 | 0.000   | -0.56790 |

IMPROPER

-M CA N H

CA +M C O

DONE

Copper(II) Ion

CU4 INT 1

CORR OMIT DU BEG

0.00000

|   |      |    |   |   |    |    |       |        |         |         |
|---|------|----|---|---|----|----|-------|--------|---------|---------|
| 1 | DUMM | DU | M | 0 | -1 | -2 | 0.000 | .0     | .0      | .00000  |
| 2 | DUMM | DU | M | 1 | 0  | -1 | 1.449 | .0     | .0      | .00000  |
| 3 | DUMM | DU | M | 2 | 1  | 0  | 1.522 | 111.1  | .0      | .00000  |
| 4 | CU   | Z4 | M | 3 | 2  | 1  | 1.000 | 90.000 | 180.000 | 0.55561 |

DONE

STOP

## Cusf.frcmod

1FWJ parameter set created by MTK++/MCPB

### MASS

NU 14.010  
SV 32.060  
SW 32.060  
Z4 63.550

### BOND

CB-NU 414.00 1.391  
CK-NU 529.00 1.304  
CC-NU 410.00 1.394  
CR-NU 488.00 1.335  
CV-NU 410.00 1.394  
LP-NU 600.00 0.200  
CT-SV 227.00 1.810  
SV-SV 166.00 2.038  
LP-SV 600.00 0.700  
CT-SW 227.00 1.810  
SW-SW 166.00 2.038  
LP-SW 600.00 0.700  
Z4-NU 89.95 2.002  
Z4-SV 55.11 2.334  
Z4-SW 46.26 2.379

### ANGLE

C-CB-NU 70.000 130.000  
CA-CB-NU 70.000 132.400  
CB-CB-NU 70.000 110.400  
H5-CK-NU 50.000 123.050  
N\*-CK-NU 70.000 113.900  
CT-CC-NU 70.000 120.000  
CW-CC-NU 70.000 120.000  
H5-CR-NU 50.000 120.000  
NA-CR-NU 70.000 120.000  
CC-CV-NU 70.000 120.000  
H4-CV-NU 50.000 120.000  
CB-NU-CK 70.000 103.800  
CC-NU-CR 70.000 117.000  
CR-NU-CV 70.000 117.000  
CB-NU-LP 50.000 126.000  
CC-NU-LP 50.000 126.000  
CK-NU-LP 50.000 126.000  
CR-NU-LP 50.000 126.000  
CV-NU-LP 50.000 126.000  
H1-CT-SV 50.000 109.500  
CT-CT-SV 50.000 114.700  
CT-SV-CT 62.000 98.900  
CT-SV-SV 68.000 103.700  
CT-SV-LP 50.000 90.000  
LP-SV-LP 50.000 180.000  
H1-CT-SW 50.000 109.500  
CT-CT-SW 50.000 114.700  
CT-SW-CT 62.000 98.900  
CT-SW-SW 68.000 103.700  
CT-SW-LP 50.000 90.000  
LP-SW-LP 50.000 180.000  
CT-SW-Z4 30.359 107.047  
NU-Z4-SV 35.691 130.959

|          |        |         |
|----------|--------|---------|
| NU-Z4-SW | 35.048 | 118.571 |
| SV-Z4-SW | 54.630 | 110.436 |
| CT-SV-Z4 | 51.650 | 107.878 |
| CR-NU-Z4 | 48.547 | 128.232 |
| CV-NU-Z4 | 50.207 | 125.689 |

#### DIHE

|             |   |        |         |        |
|-------------|---|--------|---------|--------|
| X -CB-NU-X  | 2 | 5.100  | 180.000 | 2.000  |
| X -CC-NU-X  | 2 | 4.800  | 180.000 | 2.000  |
| X -CK-NU-X  | 2 | 20.000 | 180.000 | 2.000  |
| X -CR-NU-X  | 2 | 10.000 | 180.000 | 2.000  |
| X -CV-NU-X  | 2 | 4.800  | 180.000 | 2.000  |
| X -CT-SV-X  | 3 | 1.000  | 0.000   | 3.000  |
| CT-SV-SV-CT | 1 | 3.500  | 0.000   | -2.000 |
| CT-SV-SV-CT | 1 | 0.600  | 0.000   | 3.000  |
| X -CT-SW-X  | 3 | 1.000  | 0.000   | 3.000  |
| CT-SW-SW-CT | 1 | 3.500  | 0.000   | -2.000 |
| CT-SW-SW-CT | 1 | 0.600  | 0.000   | 3.000  |
| CV-NU-Z4-SV | 3 | 0.000  | 0.000   | 3.000  |
| CV-NU-Z4-SW | 3 | 0.000  | 0.000   | 3.000  |
| CT-SV-Z4-SW | 3 | 0.000  | 0.000   | 3.000  |
| NU-Z4-SV-CT | 3 | 0.000  | 0.000   | 3.000  |
| NU-Z4-SW-CT | 3 | 0.000  | 0.000   | 3.000  |
| CR-NU-Z4-SV | 3 | 0.000  | 0.000   | 3.000  |
| CR-NU-Z4-SW | 3 | 0.000  | 0.000   | 3.000  |
| SV-Z4-SW-CT | 3 | 0.000  | 0.000   | 3.000  |

#### IMPR

|             |       |         |       |
|-------------|-------|---------|-------|
| CT-CW-CC-NU | 1.100 | 180.000 | 2.000 |
|-------------|-------|---------|-------|

#### NONB

|    |      |       |
|----|------|-------|
| NU | 1.82 | 0.170 |
| SV | 2.00 | 0.250 |
| SW | 2.00 | 0.250 |
| Z4 | 1.20 | 0.050 |





SI.53















[illegible]



SI.63

SI.64

[illegible]

[illegible]

SI.67

SI.68

SI.69



SI.71













22308 48 22317 22314 49 22320 22314 48  
22320 22317  
48 22326 22323 49 22327 22323 48 22329  
22326 48  
22335 22332 49 22338 22332 49 22338 22335  
48 22344  
22341 49 22347 22341 49 22347 22344 48  
22353 22350  
49 22356 22350 49 22356 22353 48 22362  
22359 49  
22365 22359 49 22365 22362 48 22371 22368  
49 22375  
22368 49 22374 22371 49 22380 22377 49  
49 22383 22380 48 22389 22386 49 22392  
22386 49  
22392 22389 48 22398 22395 49 22401 22395  
49 22401  
22398 48 22407 22404 49 22410 22404 49  
22410 22407  
48 22416 22413 49 22419 22413 49 22419  
22416 48  
22425 22422 48 22428 22422 49 22428 22425  
48 22438  
22431 49 22437 22431 49 22437 22434 48  
22443 22440  
49 22446 22440 48 22446 22443 48 22452  
22458 48  
22455 22449 48 22455 22453 48 22461 22458  
49 22464  
22458 49 22464 22461 48 22467 22467 48  
22473 22467  
49 22473 22470 48 22479 22476 49 22480  
22476 49  
22482 22478 48 22488 22485 49 22491 22485  
49 22491  
22488 48 22497 22494 49 22500 22494 49  
22500 22497  
48 22506 22503 49 22509 22503 49 22509  
22506 48  
22515 22512 49 22518 22512 49 22518 22515  
48 22524  
22521 49 22527 22521 49 22527 22524 48  
22533 22530  
49 22536 22530 49 22536 22533 48 22542  
22539 49  
22545 22539 49 22545 22542 48 22551 22548  
49 22554  
22548 49 22554 22551 48 22560 22557 49  
22564 22557  
49 22563 22560 48 22569 22560 48 22572  
22566 49  
22572 22569 48 22578 22575 49 22581 22575  
49 22581  
22578 48 22587 22584 49 22590 22584 49  
22590 22587  
48 22596 22593 49 22599 22593 49 22599  
22596 48  
22605 22602 48 22608 22607 49 22608 22605  
48 22614  
22611 49 22617 22611 49 22617 22614 48  
22623 22620  
49 22626 22620 49 22626 22623 48 22632  
22629 49  
22635 22629 49 22635 22632 48 22641 22638  
49 22644  
22638 49 22644 22641 48 22650 22647 49  
22653 22647  
49 22653 22650 48 22659 22656 48 22662  
22656 49  
22662 22659 48 22668 22665 49 22671 22665  
49 22671  
22668 48 22677 22674 49 22680 22674 49  
22680 22677  
48 22686 22683 49 22689 22683 49 22689  
22686 48  
22695 22692 48 22698 22692 49 22698 22695  
49 22695  
22701 49 22707 22701 49 22707 22704 48  
22713 22710  
49 22716 22710 49 22716 22713 48 22722  
22719 49  
22723 22719 49 22725 22722 48 22731 22728  
49 22734  
22728 49 22734 22718 48 22740 22737 49  
22743 22737  
49 22743 22740 48 22749 22746 49 22752  
22746 49  
22752 22749 48 22758 22755 49 22761 22755  
49 22761  
22758 48 22767 22764 49 22770 22764 49  
22773 22767  
48 22776 22773 49 22779 22773 49 22779  
22776 49  
22785 22782 49 22788 22782 49 22788 22785  
48 22794  
22791 49 22797 22791 49 22797 22794 48  
22803 22800  
49 22806 22800 49 22806 22803 48 22812  
22809 49  
22815 22809 49 22815 22812 48 22821 22818  
49 22824  
22818 49 22824 22821 48 22830 22827 49  
49 22833 22830 48 22839 22836 49 22842  
22836 49  
22842 22838 48 22848 22845 49 22851 22845  
49 22851  
22848 48 22857 22854 49 22860 22854 49  
22860 22857  
48 22866 22863 48 22869 22863 48 22869  
22866 48  
22875 22872 49 22878 22872 49 22878 22875  
48 22884  
22881 49 22887 22881 49 22887 22884 48  
22893 22890  
49 22896 22890 49 22896 22893 48 22902  
22899 49  
22905 22899 49 22905 22902 48 22911 22908  
49 22914  
22908 49 22914 22911 48 22920 22917  
22913 22917  
49 22923 22920 48 22929 22926 48 22932  
22926 49  
22932 22929 48 22938 22935 49 22941 22935  
49 22941  
22938 48 22947 22944 49 22950 22944 49  
22950 22947  
48 22956 22953 49 22959 22953 49 22959  
22956 48  
22965 22962 49 22968 22962 49 22968 22965  
48 22971  
22971 49 22977 22971 49 22977 22974 48  
22983 22980  
49 22986 22980 49 22986 22983 48 22992  
22989 49  
22995 22989 49 22995 22992 48 23001 22998  
49 23004  
22998 49 23004 23001 48 23010 23007  
23013 23007  
49 23013 23010 48 23019 23016 49 23022  
23016 49  
23022 23019 48 23028 2025 49 23031 23025  
49 23031  
23028 48 23037 23034 49 23040 23034 49  
23040 23037  
48 23046 23043 49 23049 23043 49 23049  
23046 48  
23055 23052 49 23058 23052 49 23058 23055  
48 23064  
23061 49 23067 23061 49 23067 23064 48  
23073 23070  
49 23076 23070 49 23076 23073 48 23082  
23079 49  
23085 23079 49 23085 23082 48 23091 23088  
49 23091  
23088 49 23094 23091 48 23100 23097 49  
23103 23097  
49 23103 23100 48

49 24156 24150 49 24165 24161 49 24173 24168  
24159 49  
24165 24159 49 24165 24162 49 24173 24160  
49 24174  
24168 49 24174 24171 49 24180 24177 49  
24181 24177  
49 24183 24180 49 24189 24186 49 24192  
24186 49  
24192 24189 49 24196 24195 49 24201 24195  
49 24201  
24198 49 24207 24204 49 24210 24204 49  
24210 24207  
49 24216 24213 49 24219 24213 49 24219  
24216 49  
24225 24222 49 24228 24222 49 24228 24225  
49 24228  
24223 49 24237 24231 49 24237 24234 49  
24243 24240  
49 24246 24240 49 24246 24243 49 24252  
24249 49  
24252 49 24254 24252 49 24254 24258  
49 24264  
24258 49 24264 24261 49 24270 24267 49  
24271 24267  
49 24273 24270 49 24279 24276 49 24282  
24280 49  
24282 24279 49 24288 24285 49 24291 24285  
49 24291  
24288 49 24297 24294 49 24300 24294 49  
24300 24297  
49 24306 24303 49 24309 24303 49 24309  
24306 49  
24315 24312 49 24318 24312 49 24318 24312  
49 24324  
24321 49 24327 24321 49 24327 24324 49  
24331 24330  
49 24336 24330 49 24336 24333 49 24342  
24339 49  
24355 24339 49 24355 24342 49 24355 24348  
49 24358  
24348 49 24354 24351 49 24360 24357 49  
24361 24357  
49 24363 24360 49 24369 24366 49 24372  
24366 49  
24372 24369 49 24378 24375 49 24381 24375  
49 24381  
24378 49 24387 24384 49 24390 24384 49  
24390 24387  
49 24396 24393 49 24399 24393 49 24399  
24396 49  
24405 24402 49 24408 24402 49 24408 24405  
49 24414  
24411 49 24417 24411 49 24417 24414 49  
24421 24420  
49 24426 24420 49 24426 24421 49 24432  
24429 49  
24435 24429 49 24435 24432 49 24441 24438  
49 24444  
24438 49 24444 24441 49 24450 24447 49  
24453 24447  
49 24453 24450 49 24459 24456 49 24462  
24456 49  
24462 24459 49 24468 24465 49 24471 24465  
49 24471  
24468 49 24477 24474 49 24480 24474 49  
24480 24477  
49 24486 24483 49 24489 24483 49 24489  
24486 49  
24495 24492 49 24498 24492 49 24498 24495  
49 24504  
24501 49 24507 24501 49 24507 24504 49  
24511 24508  
49 24516 24510 49 24516 24513 49 24522  
24519 49  
24525 24519 49 24525 24522 49 24531 24528  
49 24534  
24528 49 24534 24531 49 24540 24537 49  
24541 24537  
49 24543 24540 49 24549 24546 49 24552  
24546 49  
24552 24549 49 24558 24555 49 24561 24555  
49 24561  
24558 49 24567 24564 49 24570 24564 49  
24570 24567  
49 24576 24573 49 24579 24573 49 24579  
24576 49  
24585 24582 49 24588 24585 49 24588 24585  
49 24594  
24591 49 24597 24591 49 24597 24594 49  
24601 24600  
49 24606 24600 49 24606 24603 49 24612  
24609 49  
24615 24609 49 24615 24612 49 24621 24618  
49 24624  
24618 49 24624 24621 49 24630 24627 49  
24633 24627  
49 24633 24630 49 24639 24636 49 24642  
24636 49  
24642 24639 49 24648 24645 49 24651 24645  
49 24651  
24648 49 24657 24654 49 24660 24654 49  
24660 24657  
49 24666 24663 49 24669 24663 49 24669  
24666 49  
24675 24672 49 24678 24672 49 24687 24675  
49 24688  
24681 49 24687 24681 49 24687 24688 49  
24689 49  
49 24696 24690 49 24696 24693 49 24702  
24699 49  
24705 24699 49 24705 24702 49 24711 24708  
49 24714  
24708 49 24714 24711 49 24720 24717 49  
24723 24717  
49 24723 24720 49 24729 24726 49 24732  
24726 49  
49 24732 24738 49 24738 24735 49 24741 24735  
24741 49  
24738 49 24747 24744 49 24750 24744 49  
24750 24747  
49 24756 24753 49 24759 24753 49 24759  
24756 49  
24765 24762 49 24768 24762 49 24768 24765  
49 24774  
24771 49 24777 24771 49 24777 24774 49  
24781 24780  
49 24786 24780 49 24786 24783 49 24792  
24789 49  
24795 24789 49 24795 24792 49 24801 24798  
49 24804  
24798 49 24804 24801 49 24810 24807 49  
49 24813 24810 49 24819 24816 49 24822  
24816 49  
24822 24819 49 24828 24825 49 24831 24825  
49 24831  
24828 49 24837 24834 49 24840 24834 49  
24840 24837  
49 24846 24843 49 24849 24843 49 24849  
24846 49  
24855 24852 49 24858 24852 49 24858 24855  
49 24864  
24861 49 24867 24861 49 24887 24864 49  
24887 24870  
49 24876 24870 49 24876 24873 49 24882  
24879 49  
24885 24887 49 24885 24882 49 24891 24888  
49 24894  
24888 49 24894 24891 49 24900 24897 49  
24903 24897  
49 24903 24900 49 24909 24904 49 24912  
24906 49  
24912 24909 49 24918 24915 49 24921 24915  
49 24921  
24918 49 24927 24924 49 24930 24924 49  
24930 24927  
49 24936 24933 49 24939 24933 49 24939  
24936 49  
2















[illegible]

1476 1436 1461 1467 1473 3 1461 1467 1473  
1478 1438 1455 1462 1479 3 1458 1455 1461  
1484 1438 3  
1485 1455 1461 1467 3 1455 1461 1467  
1478 1438 3  
1476 35 3  
1489 1446 1462 1455 36 1449 1446 1462  
1478 1438 3  
1486 1445 1455 1458 3 1443 1440 1446  
1478 1438 3  
1483 1440 1446 1449 26 1440 1440 1446  
1452 26 3  
1486 1440 1446 1449 26 1437 1479 1473  
1476 35 3  
1485 1428 1422 1462 10 1434 1428 1462  
1444 3  
1484 1428 1437 1479 3 1431 1428 1422 1482 10  
1431 1428 1437 1440 3 1431 1428 1437 1479 3  
3 1428 1437 1440 1443 37 1425 1422 1428  
1485 1428 1437 1440 1443 37 1425 1422 1428  
1477 10 3  
1485 1422 1482 1485 18 1425 1422 1482  
1485 19 3  
1425 1422 1482 1485 3 1419 1416 1422 1425 3  
1419 1416 1422 1428 3 1419 1416 1422 1482 3  
3 1416 1422 1428 1431 10 1416 1422 1428  
1485 1428 1431 10 1416 1422 1428  
1527 1524 1530 1533 3 1527 1524 1530 1533 3  
1524 1530 1536 1539 3 1524 1530 1536 1539 3  
1521 1518 1524 1527 19 1521 1518 1524 1527 19  
1520 3  
1515 1509 1530 1533 2 1515 1509 1530 1533 2  
1515 1509 1538 1524 10 1512 1509 1538  
1521 1509 1538 1524 10 1512 1509 1538 1524 10  
1506 1500 1509 1515 13 1506 1500 1509 1515  
1506 1500 1509 1515 13 1506 1500 1509 1515  
1515 13 3  
1501 1500 1509 1518 14 1501 1500 1518  
1521 10 3  
1497 1491 1480 1518 3 1497 1491 1500 1503 10  
3 1497 1491 1500 1506 10 1497 1491 1500  
1494 1491 1480 1518 3 1494 1491 1500 1503 10  
1494 1491 1500 1506 10 1494 1491 1500  
1491 1488 1518 1521 3 1491 1500 1509 1512 14  
1491 1500 1509 1515 14 1488 1491 1500  
1480 10 3  
1488 1491 1500 1506 10 1488 1518 1509  
1512 10 3  
1488 1518 1509 1515 10 1572 1569 1575  
1578 14 3  
1572 1569 1575 1578 2 1569 1575 1581 1584 3  
1575 1569 1575 1578 2 1569 1575 1581 1584 3  
1554 1551 1560 1563 3 1554 1551 1560 1566 3  
1554 1560 1563 1566 3 1554 1560 1566 3  
1548 1542 1536 1569 10 1548 1542 1551  
1554 13 3  
1548 1542 1551 1557 3 1548 1542 1551  
1554 1542 1551 1557 3 1548 1542 1551  
1539 1536 1542 1545 10 1539 1536 1542  
1548 10 3  
1539 1536 1542 1551 10 1539 1536 1542  
1572 18 3  
1539 1536 1569 1572 19 1539 1536 1569  
1575 3  
1548 1542 1551 1554 14 1536 1542 1551  
1557 3  
1536 1569 1575 1578 2 1536 1536 1536 1539 3  
3 1533 1530 1536 1542 3 1533 1530 1536 1569 2  
1530 1536 1542 1545 10 1530 1536 1542  
1548 10 3  
1620 1620 1626 1629 1 1623 1620 1626 1629 2  
1620 1626 1632 1635 3 1617 1608 1605 3612 39  
1644 1608 1605 3612 39 1611 1608 1605  
1602 1596 1605 1608 39 1602 1596 1605  
3612 25 3  
1599 1596 1605 1608 39 1599 1596 1605  
1596 1605 1608 1611 39 1593 1587 1608  
1614 39 3  
1596 1605 1608 1617 39 1596 1587 1581  
1599 1587 1596 1599 10 1593 1587 1596  
1620 10 3  
1590 1587 1596 1605 10 1590 1587 1596  
1590 1587 1596 1599 10 1590 1587 1596  
1602 1590 1587 1596 1605 10 1584 1581 1587  
1584 1581 1587 1593 10 1584 1581 1587  
1584 1581 1587 1620 1623 13 1584 1581 1620  
1623 19 3  
1584 1581 1620 1626 3 1584 1581 1596 1599 19  
3 1581 1587 1596 1602 10 1581 1620 1626  
1629 2 3  
1578 1575 1581 1584 3 1578 1575 1581 1587  
1587 3  
1578 1575 181 1584 3 1578 1575 1581 1587  
1671 1 3  
1662 1662 1668 1671 2 1662 1668 1674 1677 3  
3 1663 1644 1638 1656 24 1653 1644 1638  
1656 25 3  
1608 1644 1638 1656 24 1650 1644 1638  
1662 1644 1638 1656 24 1650 1644 1638  
1656 1644 1638 1656 1659 24 1644 1638 1656  
1659 24 3  
1641 1638 1632 1662 10 1641 1638 1644  
1647 10 3  
1641 1638 1644 1659 24 1641 1638 1644  
1663 10 3  
1635 1632 1638 1656 1659 24 1635 1632 1638  
1656 24 3  
1635 1632 1638 1656 25 1635 1632 1638  
1635 1632 1662 1665 25 1635 1632 1662  
1668 1638 1644 1647 14 1632 1638 1644  
1632 14 3  
1632 1638 1644 1653 14 1632 1638 1656  
1671 2 3  
1629 1626 1632 1635 3 1629 1626 1632 1638 31  
1629 1626 1632 1662 3 1629 1632 1638 1641 3  
17 3  
1716 1713 1719 1722 1 1716 1713 1719 1722 3  
1713 1719 1722 1728 3 1716 1713 1719 1728 3612 39  
1707 1701 1698 3612 39 1704 1701 1698  
3612 39 3  
1692 1699 1698 1701 39 1692 1698 1698  
3612 39 3  
1689 1698 1701 1704 39 1689 1698 1701  
1707 3  
1689 1698 1701 1710 39 1686 1690 1698  
1703 10 3  
1680 1680 1689 1692 10 1683 1680 1689  
1713 10 3  
1680 1680 1689 1698 10 1683 1680 1674  
1695 10 3  
1680 1680 1689 1692 10 16

[illegible][illegible]





[illegible]

|      |      |      |      |    |      |      |      |      |    |
|------|------|------|------|----|------|------|------|------|----|
| 1410 | 1416 | 1422 | 1482 | 7  | 1410 | 1416 | 1422 | 1482 | 7  |
| 1412 | 1418 | 1424 | 1484 | 8  | 1412 | 1418 | 1424 | 1484 | 8  |
| 1414 | 1420 | 1426 | 1486 | 9  | 1414 | 1420 | 1426 | 1486 | 9  |
| 1416 | 1422 | 1428 | 1488 | 10 | 1416 | 1422 | 1428 | 1488 | 10 |
| 1418 | 1424 | 1430 | 1490 | 11 | 1418 | 1424 | 1430 | 1490 | 11 |
| 1420 | 1426 | 1432 | 1492 | 12 | 1420 | 1426 | 1432 | 1492 | 12 |
| 1422 | 1428 | 1434 | 1494 | 13 | 1422 | 1428 | 1434 | 1494 | 13 |
| 1424 | 1430 | 1436 | 1496 | 14 | 1424 | 1430 | 1436 | 1496 | 14 |
| 1426 | 1432 | 1438 | 1498 | 15 | 1426 | 1432 | 1438 | 1498 | 15 |
| 1428 | 1434 | 1440 | 1500 | 16 | 1428 | 1434 | 1440 | 1500 | 16 |
| 1430 | 1436 | 1442 | 1502 | 17 | 1430 | 1436 | 1442 | 1502 | 17 |
| 1432 | 1438 | 1444 | 1504 | 18 | 1432 | 1438 | 1444 | 1504 | 18 |
| 1434 | 1440 | 1446 | 1506 | 19 | 1434 | 1440 | 1446 | 1506 | 19 |
| 1436 | 1442 | 1448 | 1508 | 20 | 1436 | 1442 | 1448 | 1508 | 20 |
| 1438 | 1444 | 1450 | 1510 | 21 | 1438 | 1444 | 1450 | 1510 | 21 |
| 1440 | 1446 | 1452 | 1512 | 22 | 1440 | 1446 | 1452 | 1512 | 22 |
| 1442 | 1448 | 1454 | 1514 | 23 | 1442 | 1448 | 1454 | 1514 | 23 |
| 1444 | 1450 | 1456 | 1516 | 24 | 1444 | 1450 | 1456 | 1516 | 24 |
| 1446 | 1452 | 1458 | 1518 | 25 | 1446 | 1452 | 1458 | 1518 | 25 |
| 1448 | 1454 | 1460 | 1520 | 26 | 1448 | 1454 | 1460 | 1520 | 26 |
| 1450 | 1456 | 1462 | 1522 | 27 | 1450 | 1456 | 1462 | 1522 | 27 |
| 1452 | 1458 | 1464 | 1524 | 28 | 1452 | 1458 | 1464 | 1524 | 28 |
| 1454 | 1460 | 1466 | 1526 | 29 | 1454 | 1460 | 1466 | 1526 | 29 |
| 1456 | 1462 | 1468 | 1528 | 30 | 1456 | 1462 | 1468 | 1528 | 30 |
| 1458 | 1464 | 1470 | 1530 | 31 | 1458 | 1464 | 1470 | 1530 | 31 |
| 1460 | 1466 | 1472 | 1532 | 32 | 1460 | 1466 | 1472 | 1532 | 32 |
| 1462 | 1468 | 1474 | 1534 | 33 | 1462 | 1468 | 1474 | 1534 | 33 |
| 1464 | 1470 | 1476 | 1536 | 34 | 1464 | 1470 | 1476 | 1536 | 34 |
| 1466 | 1472 | 1478 | 1538 | 35 | 1466 | 1472 | 1478 | 1538 | 35 |
| 1468 | 1474 | 1480 | 1540 | 36 | 1468 | 1474 | 1480 | 1540 | 36 |
| 1470 | 1476 | 1482 | 1542 | 37 | 1470 | 1476 | 1482 | 1542 | 37 |
| 1472 | 1478 | 1484 | 1544 | 38 | 1472 | 1478 | 1484 | 1544 | 38 |
| 1474 | 1480 | 1486 | 1546 | 39 | 1474 | 1480 | 1486 | 1546 | 39 |
| 1476 | 1482 | 1488 | 1548 | 40 | 1476 | 1482 | 1488 | 1548 | 40 |
| 1478 | 1484 | 1490 | 1550 | 41 | 1478 | 1484 | 1490 | 1550 | 41 |
| 1480 | 1486 | 1492 | 1552 | 42 | 1480 | 1486 | 1492 | 1552 | 42 |
| 1482 | 1488 | 1494 | 1554 | 43 | 1482 | 1488 | 1494 | 1554 | 43 |
| 1484 | 1490 | 1496 | 1556 | 44 | 1484 | 1490 | 1496 | 1556 | 44 |
| 1486 | 1492 | 1498 | 1558 | 45 | 1486 | 1492 | 1498 | 1558 | 45 |
| 1488 | 1494 | 1500 | 1560 | 46 | 1488 | 1494 | 1500 | 1560 | 46 |
| 1490 | 1496 | 1502 | 1562 | 47 | 1490 | 1496 | 1502 | 1562 | 47 |
| 1492 | 1498 | 1504 | 1564 | 48 | 1492 | 1498 | 1504 | 1564 | 48 |
| 1494 | 1500 | 1506 | 1566 | 49 | 1494 | 1500 | 1506 | 1566 | 49 |
| 1496 | 1502 | 1508 | 1568 | 50 | 1496 | 1502 | 1508 | 1568 | 50 |
| 1498 | 1504 | 1510 | 1570 | 51 | 1498 | 1504 | 1510 | 1570 | 51 |
| 1500 | 1506 | 1512 | 1572 | 52 | 150  |      |      |      |    |

|    |      |      |      |      |    |      |      |      |      |
|----|------|------|------|------|----|------|------|------|------|
| 1  | 1713 | 1719 | 1725 | 1785 | 9  | 1713 | 1719 | 1725 | 1785 |
| 2  | 1716 | 1719 | 1725 | 1785 | 10 | 1713 | 1719 | 1725 | 1785 |
| 3  | 1716 | 1719 | 1725 | 1785 | 11 | 1716 | 1719 | 1725 | 1785 |
| 4  | 1716 | 1719 | 1725 | 1785 | 12 | 1716 | 1719 | 1725 | 1785 |
| 5  | 1716 | 1719 | 1725 | 1785 | 13 | 1716 | 1719 | 1725 | 1785 |
| 6  | 1716 | 1719 | 1725 | 1785 | 14 | 1716 | 1719 | 1725 | 1785 |
| 7  | 1716 | 1719 | 1725 | 1785 | 15 | 1716 | 1719 | 1725 | 1785 |
| 8  | 1716 | 1719 | 1725 | 1785 | 16 | 1716 | 1719 | 1725 | 1785 |
| 9  | 1716 | 1719 | 1725 | 1785 | 17 | 1716 | 1719 | 1725 | 1785 |
| 10 | 1716 | 1719 | 1725 | 1785 | 18 | 1716 | 1719 | 1725 | 1785 |
| 11 | 1716 | 1719 | 1725 | 1785 | 19 | 1716 | 1719 | 1725 | 1785 |
| 12 | 1716 | 1719 | 1725 | 1785 | 20 | 1716 | 1719 | 1725 | 1785 |
| 13 | 1716 | 1719 | 1725 | 1785 | 21 | 1716 | 1719 | 1725 | 1785 |
| 14 | 1716 | 1719 | 1725 | 1785 | 22 | 1716 | 1719 | 1725 | 1785 |
| 15 | 1716 | 1719 | 1725 | 1785 | 23 | 1716 | 1719 | 1725 | 1785 |
| 16 | 1716 | 1719 | 1725 | 1785 | 24 | 1716 | 1719 | 1725 | 1785 |
| 17 | 1716 | 1719 | 1725 | 1785 | 25 | 1716 | 1719 | 1725 | 1785 |
| 18 | 1716 | 1719 | 1725 | 1785 | 26 | 1716 | 1719 | 1725 | 1785 |
| 19 | 1716 | 1719 | 1725 | 1785 | 27 | 1716 | 1719 | 1725 | 1785 |
| 20 | 1716 | 1719 | 1725 | 1785 | 28 | 1716 | 1719 | 1725 | 1785 |
| 21 | 1716 | 1719 | 1725 | 1785 | 29 | 1716 | 1719 | 1725 | 1785 |
| 22 | 1716 | 1719 | 1725 | 1785 | 30 | 1716 | 1719 | 1725 | 1785 |
| 23 | 1716 | 1719 | 1725 | 1785 | 31 | 1716 | 1719 | 1725 | 1785 |
| 24 | 1716 | 1719 | 1725 | 1785 | 32 | 1716 | 1719 | 1725 | 1785 |
| 25 | 1716 | 1719 | 1725 | 1785 | 33 | 1716 | 1719 | 1725 | 1785 |
| 26 | 1716 | 1719 | 1725 | 1785 | 34 | 1716 | 1719 | 1725 | 1785 |
| 27 | 1716 | 1719 | 1725 | 1785 | 35 | 1716 | 1719 | 1725 | 1785 |
| 28 | 1716 | 1719 | 1725 | 1785 | 36 | 1716 | 1719 | 1725 | 1785 |
| 29 | 1716 | 1719 | 1725 | 1785 | 37 | 1716 | 1719 | 1725 | 1785 |
| 30 | 1716 | 1719 | 1725 | 1785 | 38 | 1716 | 1719 | 1725 | 1785 |
| 31 | 1716 | 1719 | 1725 | 1785 | 39 | 1716 | 1719 | 1725 | 1785 |
| 32 | 1716 | 1719 | 1725 | 1785 | 40 | 1716 | 1719 | 1725 | 1785 |
| 33 | 1716 | 1719 | 1725 | 1785 | 41 | 1716 | 1719 | 1725 | 1785 |
| 34 | 1716 | 1719 | 1725 | 1785 | 42 | 1716 | 1719 | 1725 | 1785 |
| 35 | 1716 | 1719 | 1725 | 1785 | 43 | 1716 | 1719 | 1725 | 1785 |
| 36 | 1716 | 1719 | 1725 | 1785 | 44 | 1716 | 1719 | 1725 | 1785 |
| 37 | 1716 | 1719 | 1725 | 1785 | 45 | 1716 | 1719 | 1725 | 1785 |
| 38 | 1716 | 1719 | 1725 | 1785 | 46 | 1716 | 1719 | 1725 | 1785 |
| 39 | 1716 | 1719 | 1725 | 1785 | 47 | 1716 | 1719 | 1725 | 1785 |
| 40 | 1716 | 1719 | 1725 | 1785 | 48 | 1716 | 1719 | 1725 | 1785 |
| 41 | 1716 | 1719 | 1725 | 1785 | 49 | 1716 | 1719 | 1725 | 1785 |
| 42 | 1716 | 1719 | 1725 | 1785 | 50 | 1716 | 1719 | 1725 | 1785 |
| 43 | 1716 | 1719 | 1725 | 1785 | 51 | 1716 | 1719 | 1725 | 1785 |
| 44 | 1716 | 1719 | 1725 | 1785 | 52 | 1716 | 1719 | 1725 | 1785 |
| 45 | 1716 | 1719 | 1725 | 1785 | 53 | 1716 | 1719 | 1725 | 1785 |
| 46 | 1716 | 1719 | 1725 | 1785 | 54 |      |      |      |      |

[illegible]





















SI.100

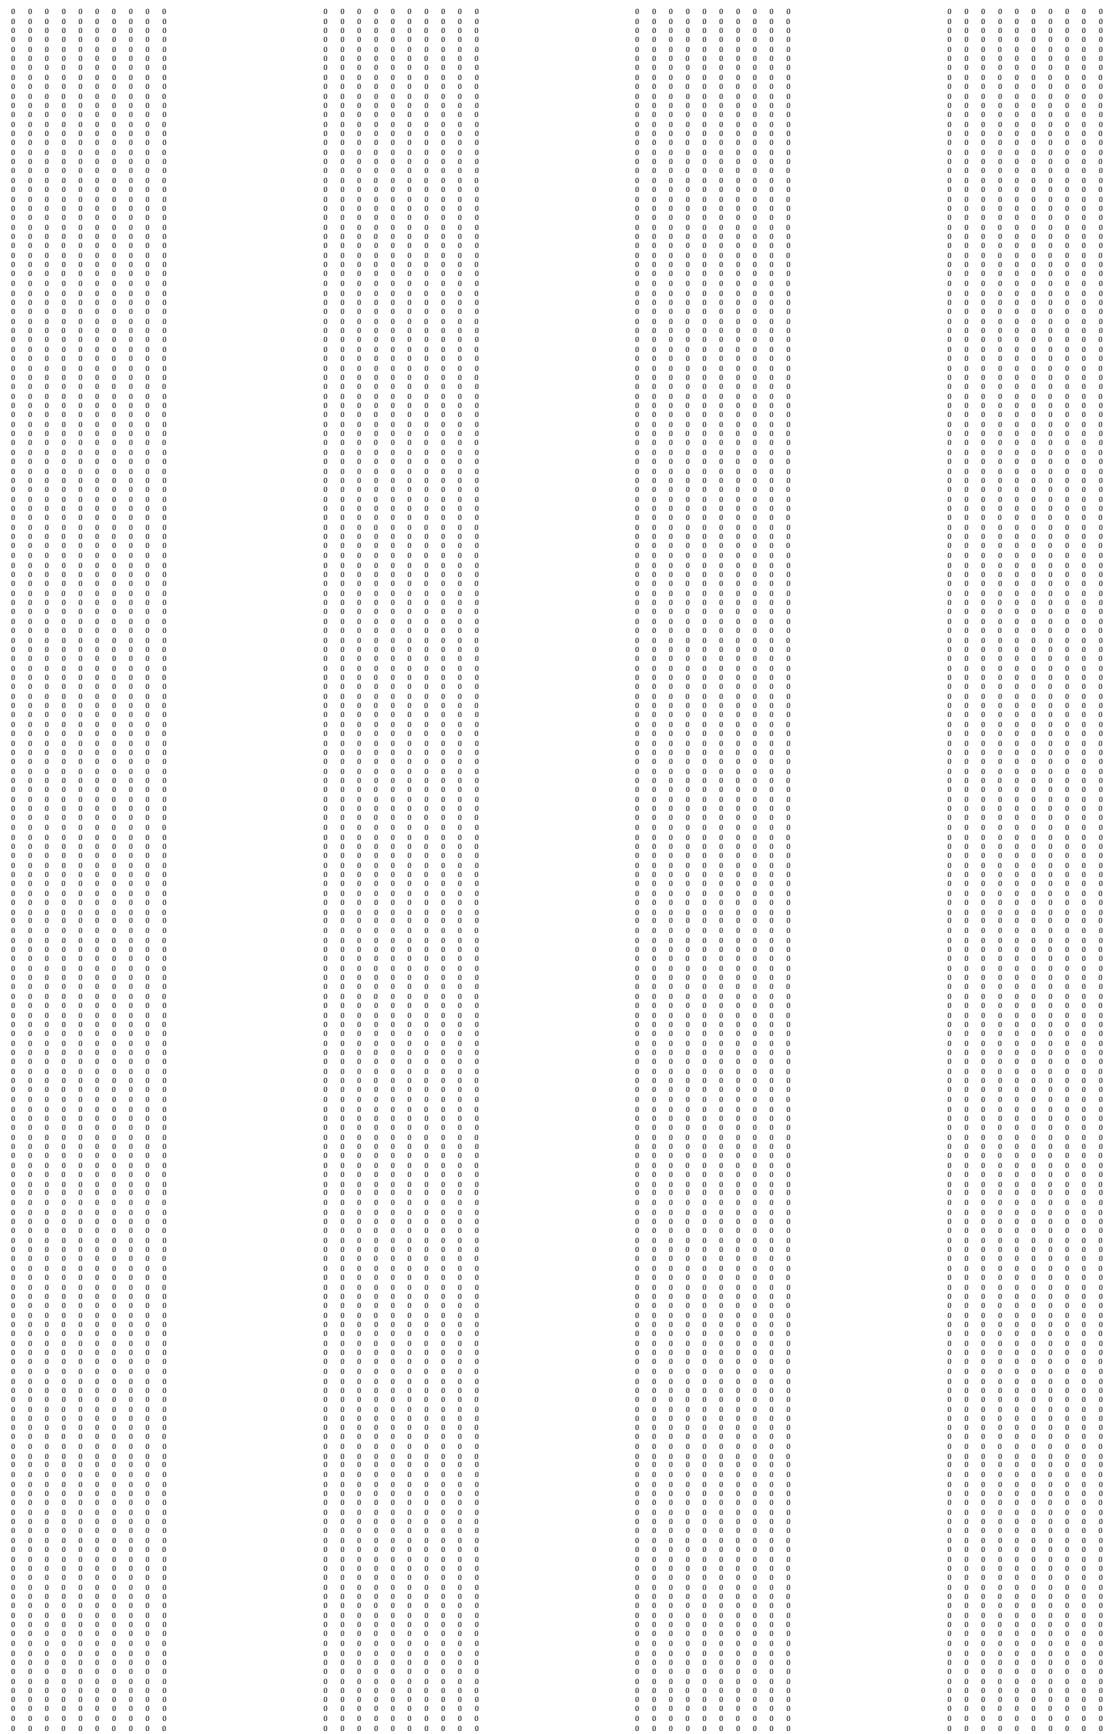



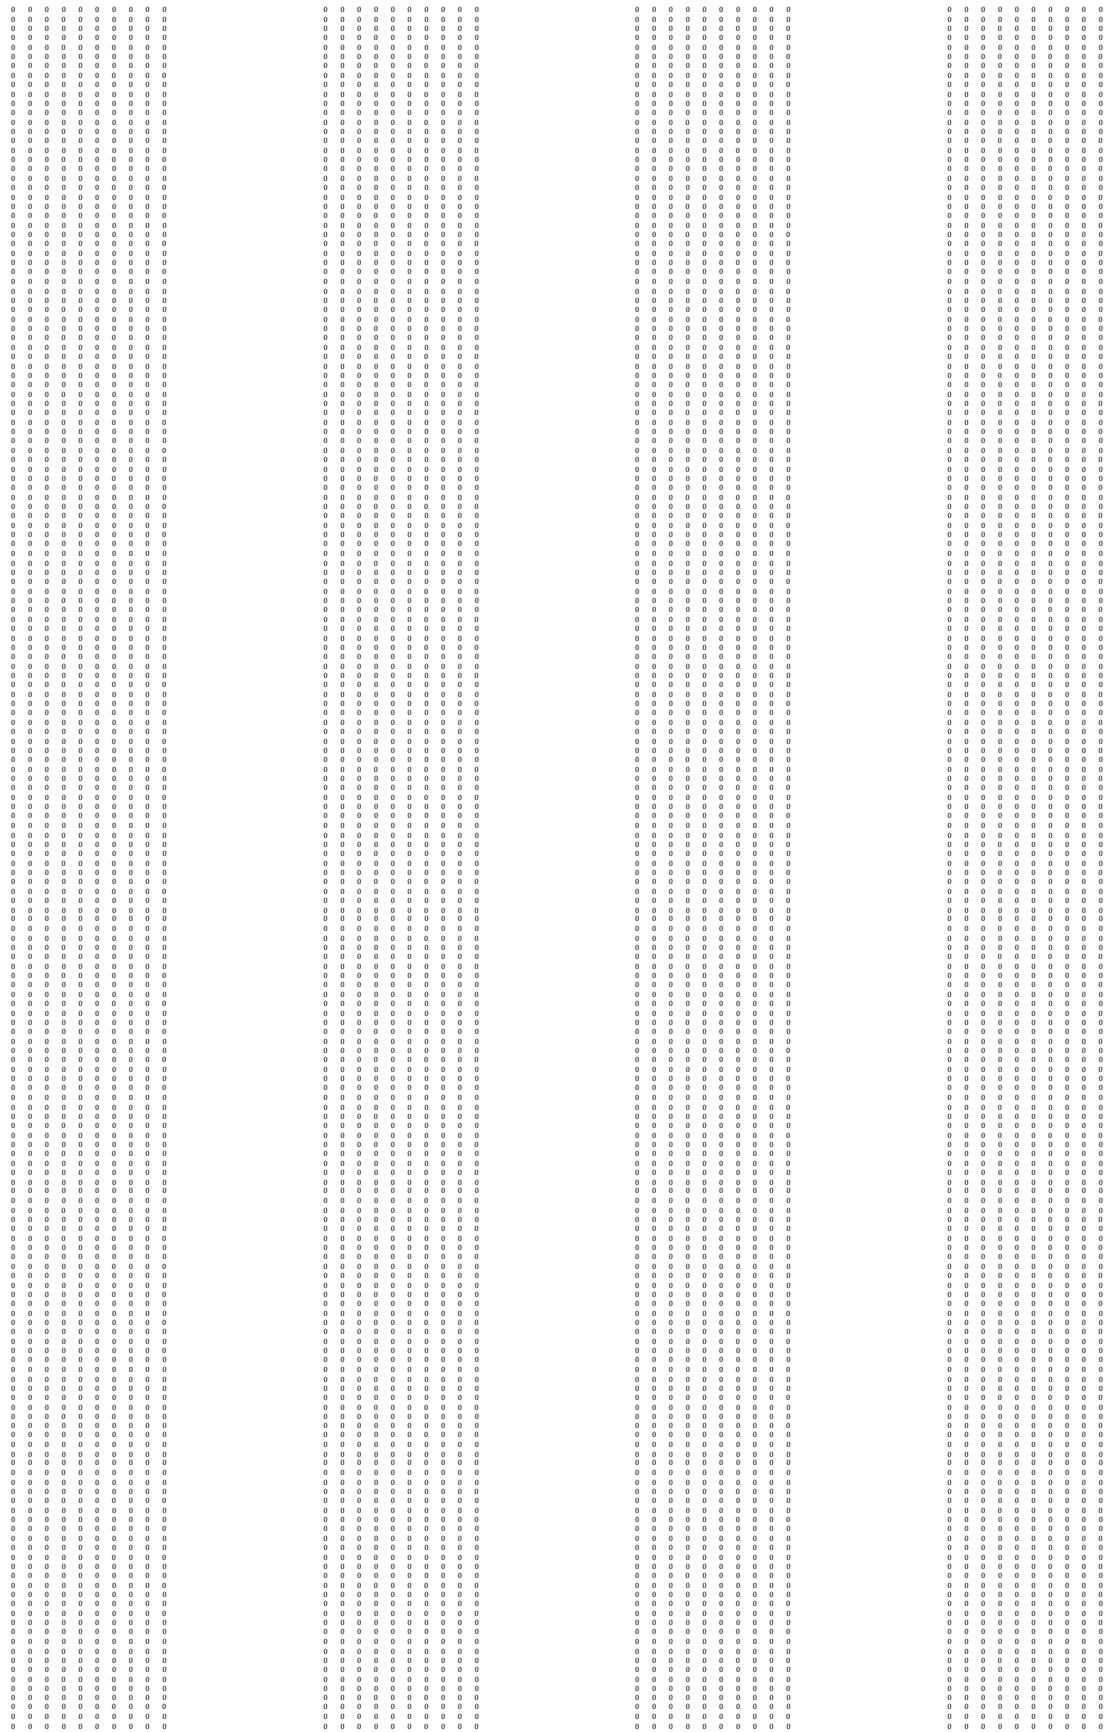























[illegible]

[illegible]
